# Supplementary material for: Phosphomolybdic and phosphotungstic acids as efficient catalysts for the synthesis of bridged 1,2,4,5-tetraoxanes from β-diketones and hydrogen peroxide
Source: Royal Society of Chemistry journal article supplement (doi:10.1039/c3ob27239g), 2013-01-01

## SUPPORTING INFORMATION

### **Phosphomolybdic and phosphotungstic acids as efficient catalysts for the synthesis of bridged 1,2,4,5-tetraoxanes from $\beta$ -diketones and hydrogen peroxide**

*AUTHOR NAMES* Alexander O. Terent'ev,<sup>\*a</sup> Ivan A. Yaremenko<sup>a</sup>, Vera A. Vil',<sup>a</sup> Igor K. Moiseev,<sup>b</sup>  
Sergey A. Kon'kov,<sup>b</sup> Valery M. Dembitsky,<sup>c</sup> Dmitri O. Levitsky,<sup>d</sup> and Gennady I. Nikishin<sup>a</sup>

#### AUTHOR ADDRESSES

<sup>a</sup> N.D. Zelinsky Institute of Organic Chemistry, Russian Academy of Sciences, 47 Leninsky prosp., 119991 Moscow, Russian Federation

<sup>b</sup> Samara State Technical University, Molodogvardeyskaya Str. 244, 443100 Samara, Russian Federation

<sup>c</sup> Institute for Drug Research, P.O. Box 12065, Hebrew University, Jerusalem 91120, Israel

<sup>d</sup> Université de Nantes, 44322 Nantes Cedex 03, France.

CORRESPONDING AUTHOR E-MAIL ADDRESS terentev@ioc.ac.ru

## Table of contents

| <b>NMR spectra of <math>\beta</math>-diketones (1a-r)</b>                                     |     |
|-----------------------------------------------------------------------------------------------|-----|
| <sup>1</sup> H NMR of 6-Methylheptane-2,4-dione ( <b>1b</b> )                                 | S7  |
| <sup>1</sup> H NMR of 7-Methyloctane-3,5-dione ( <b>1c</b> )                                  | S8  |
| <sup>1</sup> H NMR of 1-(1-Adamantyl)butane-1,3-dione ( <b>1e</b> )                           | S9  |
| <sup>1</sup> H NMR of 1-(1-Adamantyl)pentane-1,3-dione ( <b>1f</b> )                          | S10 |
| <sup>1</sup> H NMR of 3-Hexyl-2,4-pentanedione ( <b>1g</b> )                                  | S11 |
| <sup>1</sup> H NMR of 3-Allylpentane-2,4-dione ( <b>1h</b> )                                  | S12 |
| <sup>1</sup> H NMR of 3-(1-Adamantyl)pentane-2,4-dione ( <b>1i</b> )                          | S13 |
| <sup>1</sup> H NMR of 3-(1-Adamantyl)-6-methylheptane-2,4-dione ( <b>1j</b> )                 | S14 |
| <sup>13</sup> C NMR of 3-(1-Adamantyl)-6-methylheptane-2,4-dione ( <b>1j</b> )                | S15 |
| <sup>1</sup> H NMR of 3-Benzylpentane-2,4-dione ( <b>1k</b> )                                 | S16 |
| <sup>1</sup> H NMR of 3-(1-Phenylethyl)pentane-2,4-dione ( <b>1l</b> )                        | S17 |
| <sup>1</sup> H NMR of 3-[1-(4-Methylphenyl)ethyl]pentane-2,4-dione ( <b>1m</b> )              | S18 |
| <sup>1</sup> H NMR of 3-[1-(4-Bromophenyl)ethyl]pentane-2,4-dione ( <b>1n</b> )               | S19 |
| <sup>1</sup> H NMR of 2-Methyl-1-phenylbutane-1,3-dione ( <b>1o</b> )                         | S20 |
| <sup>1</sup> H NMR of 2-Benzyl-1-phenylbutane-1,3-dione ( <b>1p</b> )                         | S21 |
| <sup>1</sup> H NMR of 2-Methyl-1,3-diphenylpropane-1,3-dione ( <b>1q</b> )                    | S22 |
| <sup>1</sup> H NMR of 2-Benzyl-1,3-diphenylpropane-1,3-dione ( <b>1r</b> )                    | S23 |
| <b>NMR spectra of tetraoxanes (2a-r)</b>                                                      |     |
| <sup>1</sup> H NMR of 1,4-Dimethyl-2,3,5,6-tetraoxabicyclo[2.2.1]heptane ( <b>2a</b> )        | S24 |
| <sup>13</sup> C NMR of 1,4-Dimethyl-2,3,5,6-tetraoxabicyclo[2.2.1]heptane ( <b>2a</b> )       | S25 |
| <sup>1</sup> H NMR of 1-Isobutyl-4-methyl-2,3,5,6-tetraoxabicyclo[2.2.1]heptane ( <b>2b</b> ) | S26 |

|                                                                                                                     |     |
|---------------------------------------------------------------------------------------------------------------------|-----|
| <sup>13</sup> C NMR of 1-Isobutyl-4-methyl-2,3,5,6-tetraoxabicyclo[2.2.1]heptane ( <b>2b</b> )                      | S27 |
| <sup>1</sup> H NMR of 1-Ethyl-4-isobutyl-2,3,5,6-tetraoxabicyclo[2.2.1]heptane ( <b>2c</b> )                        | S28 |
| <sup>13</sup> C NMR of 1-Ethyl-4-isobutyl-2,3,5,6-tetraoxabicyclo[2.2.1]heptane ( <b>2c</b> )                       | S29 |
| <sup>1</sup> H NMR of 1,4-Di- <i>tert</i> -butyl-2,3,5,6-tetraoxabicyclo[2.2.1]heptane ( <b>2d</b> )                | S30 |
| <sup>13</sup> C NMR of 1,4-Di- <i>tert</i> -butyl-2,3,5,6-tetraoxabicyclo[2.2.1]heptane ( <b>2d</b> )               | S31 |
| <sup>1</sup> H NMR of 1-(1-Adamantyl)-4-methyl-2,3,5,6-tetraoxabicyclo[2.2.1]heptane ( <b>2e</b> )                  | S32 |
| <sup>13</sup> C NMR of 1-(1-Adamantyl)-4-methyl-2,3,5,6-tetraoxabicyclo[2.2.1]heptane ( <b>2e</b> )                 | S33 |
| <sup>1</sup> H NMR of 1-(1-Adamantyl)-4-ethyl-2,3,5,6-tetraoxabicyclo[2.2.1]heptane ( <b>2f</b> )                   | S34 |
| <sup>13</sup> C NMR of 1-(1-Adamantyl)-4-ethyl-2,3,5,6-tetraoxabicyclo[2.2.1]heptane ( <b>2f</b> )                  | S35 |
| <sup>1</sup> H NMR of 1,4-Dimethyl-7-hexyl-2,3,5,6-tetraoxabicyclo[2.2.1]heptane ( <b>2g</b> )                      | S36 |
| <sup>13</sup> C NMR of 1,4-Dimethyl-7-hexyl-2,3,5,6-tetraoxabicyclo[2.2.1]heptane ( <b>2g</b> )                     | S37 |
| <sup>1</sup> H NMR of 7-Allyl-1,4-dimethyl-2,3,5,6-tetraoxabicyclo[2.2.1]heptane ( <b>2h</b> )                      | S38 |
| <sup>1</sup> H NMR of 7-(1-Adamantyl)-1,4-dimethyl-2,3,5,6-tetraoxabicyclo[2.2.1]heptane ( <b>2i</b> )              | S39 |
| <sup>1</sup> H NMR of 7-(1-Adamantyl)-1-isobutyl-4-methyl-2,3,5,6-tetraoxabicyclo[2.2.1]heptane ( <b>2j</b> )       | S40 |
| <sup>13</sup> C NMR of 7-(1-Adamantyl)-1-isobutyl-4-methyl-2,3,5,6-tetraoxabicyclo[2.2.1]heptane ( <b>2j</b> )      | S41 |
| <sup>1</sup> H NMR of 7-Benzyl-1,4-dimethyl-2,3,5,6-tetraoxabicyclo[2.2.1]heptane ( <b>2k</b> )                     | S42 |
| <sup>1</sup> H NMR of 1,4-Dimethyl-7-(1-phenylethyl)-2,3,5,6-tetraoxabicyclo[2.2.1]heptane ( <b>2l</b> )            | S43 |
| <sup>13</sup> C NMR of 1,4-Dimethyl-7-(1-phenylethyl)-2,3,5,6-tetraoxabicyclo[2.2.1]heptane ( <b>2l</b> )           | S44 |
| <sup>1</sup> H NMR of 1,4-Dimethyl-7-[1-(4-methylphenyl)ethyl]-2,3,5,6-tetraoxabicyclo[2.2.1]heptane ( <b>2m</b> )  | S45 |
| <sup>13</sup> C NMR of 1,4-Dimethyl-7-[1-(4-methylphenyl)ethyl]-2,3,5,6-tetraoxabicyclo[2.2.1]heptane ( <b>2m</b> ) | S46 |

|                                                                                                                    |     |
|--------------------------------------------------------------------------------------------------------------------|-----|
| <sup>1</sup> H NMR of 7-[1-(4-Bromophenyl)ethyl]-1,4-dimethyl-2,3,5,6-tetraoxabicyclo[2.2.1]heptane ( <b>2n</b> )  | S47 |
| <sup>13</sup> C NMR of 7-[1-(4-Bromophenyl)ethyl]-1,4-dimethyl-2,3,5,6-tetraoxabicyclo[2.2.1]heptane ( <b>2n</b> ) | S48 |
| <sup>1</sup> H NMR of 1,7-Dimethyl-4-phenyl-2,3,5,6-tetraoxabicyclo[2.2.1]heptane ( <b>2o</b> )                    | S49 |
| <sup>13</sup> C NMR of 1,7-Dimethyl-4-phenyl-2,3,5,6-tetraoxabicyclo[2.2.1]heptane ( <b>2o</b> )                   | S50 |
| <sup>1</sup> H NMR of 7-Benzyl-1-methyl-4-phenyl-2,3,5,6-tetraoxabicyclo[2.2.1]heptane ( <b>2p</b> )               | S51 |
| <sup>13</sup> C NMR of 7-Benzyl-1-methyl-4-phenyl-2,3,5,6-tetraoxabicyclo[2.2.1]heptane ( <b>2p</b> )              | S52 |
| <sup>1</sup> H NMR of 1,4-Diphenyl-7-methyl-2,3,5,6-tetraoxabicyclo[2.2.1]heptane ( <b>2q</b> )                    | S53 |
| <sup>13</sup> C NMR of 1,4-Diphenyl-7-methyl-2,3,5,6-tetraoxabicyclo[2.2.1]heptane ( <b>2q</b> )                   | S54 |
| <sup>1</sup> H NMR of 7-Benzyl-1,4-diphenyl-2,3,5,6-tetraoxabicyclo[2.2.1]heptane ( <b>2r</b> )                    | S55 |
| <sup>13</sup> C NMR of 7-Benzyl-1,4-diphenyl-2,3,5,6-tetraoxabicyclo[2.2.1]heptane ( <b>2r</b> )                   | S56 |
| <b>HRMS of β-diketone (1j)</b>                                                                                     |     |
| 3-(1-Adamantyl)-6-methylheptane-2,4-dione ( <b>1j</b> )                                                            | S57 |
| <b>HRMS of tetraoxanes (2a-r)</b>                                                                                  |     |
| 1,4-Dimethyl-2,3,5,6-tetraoxabicyclo[2.2.1]heptane ( <b>2a</b> )                                                   | S58 |
| 1-Isobutyl-4-methyl-2,3,5,6-tetraoxabicyclo[2.2.1]heptane ( <b>2b</b> )                                            | S59 |
| 1-Ethyl-4-isobutyl-2,3,5,6-tetraoxabicyclo[2.2.1]heptane ( <b>2c</b> )                                             | S60 |
| 1,4-Di- <i>tert</i> -butyl-2,3,5,6-tetraoxabicyclo[2.2.1]heptane ( <b>2d</b> )                                     | S61 |
| 1-(1-Adamantyl)-4-methyl-2,3,5,6-tetraoxabicyclo[2.2.1]heptane ( <b>2e</b> )                                       | S62 |
| 1-(1-Adamantyl)-4-ethyl-2,3,5,6-tetraoxabicyclo[2.2.1]heptane ( <b>2f</b> )                                        | S63 |
| 1,4-Dimethyl-7-hexyl-2,3,5,6-tetraoxabicyclo[2.2.1]heptane ( <b>2g</b> )                                           | S64 |
| 7-(1-Adamantyl)-1-isobutyl-4-methyl-2,3,5,6-tetraoxabicyclo[2.2.1]heptane ( <b>2j</b> )                            | S65 |
| 1,4-Dimethyl-7-(1-phenylethyl)-2,3,5,6-tetraoxabicyclo[2.2.1]heptane ( <b>2l</b> )                                 | S66 |

|                                                                                                    |     |
|----------------------------------------------------------------------------------------------------|-----|
| 1,4-Dimethyl-7-[1-(4-methylphenyl)ethyl]-2,3,5,6-tetraoxabicyclo[2.2.1]heptane ( <b>2m</b> )       | S67 |
| 7-[1-(4-Bromophenyl)ethyl]-1,4-dimethyl-2,3,5,6-tetraoxabicyclo[2.2.1]heptane ( <b>2n</b> )        | S68 |
| 1,7-Dimethyl-4-phenyl-2,3,5,6-tetraoxabicyclo[2.2.1]heptane ( <b>2o</b> )                          | S69 |
| 7-Benzyl-1-methyl-4-phenyl-2,3,5,6-tetraoxabicyclo[2.2.1]heptane ( <b>2p</b> )                     | S70 |
| 1,4-Diphenyl-7-methyl-2,3,5,6-tetraoxabicyclo[2.2.1]heptane ( <b>2q</b> )                          | S71 |
| 7-Benzyl-1,4-diphenyl-2,3,5,6-tetraoxabicyclo[2.2.1]heptanes ( <b>2r</b> )                         | S72 |
| <b>IR spectrum of diketone</b>                                                                     |     |
| IR of 3-(1-Adamantyl)-6-methylheptane-2,4-dione ( <b>1j</b> )                                      | S73 |
| <b>IR spectra of tetraoxanes (2a-r)</b>                                                            |     |
| IR of 1,4-Dimethyl-2,3,5,6-tetraoxabicyclo[2.2.1]heptane ( <b>2a</b> )                             | S74 |
| IR of 1-Isobutyl-4-methyl-2,3,5,6-tetraoxabicyclo[2.2.1]heptane ( <b>2b</b> )                      | S75 |
| IR of 1-Ethyl-4-isobutyl-2,3,5,6-tetraoxabicyclo[2.2.1]heptane ( <b>2c</b> )                       | S76 |
| IR of 1,4-Di- <i>tert</i> -butyl-2,3,5,6-tetraoxabicyclo[2.2.1]heptane ( <b>2d</b> )               | S77 |
| IR of 1-(1-Adamantyl)-4-methyl-2,3,5,6-tetraoxabicyclo[2.2.1]heptane ( <b>2e</b> )                 | S78 |
| IR of 1-(1-Adamantyl)-4-ethyl-2,3,5,6-tetraoxabicyclo[2.2.1]heptane ( <b>2f</b> )                  | S79 |
| IR of 1,4-Dimethyl-7-hexyl-2,3,5,6-tetraoxabicyclo[2.2.1]heptane ( <b>2g</b> )                     | S80 |
| IR of 7-Allyl-1,4-dimethyl-2,3,5,6-tetraoxabicyclo[2.2.1]heptane ( <b>2h</b> )                     | S81 |
| IR of 7-(1-Adamantyl)-1,4-dimethyl-2,3,5,6-tetraoxabicyclo[2.2.1]heptane ( <b>2i</b> )             | S82 |
| IR of 7-(1-Adamantyl)-1-isobutyl-4-methyl-2,3,5,6-tetraoxabicyclo[2.2.1]heptane ( <b>2j</b> )      | S83 |
| IR of 7-Benzyl-1,4-dimethyl-2,3,5,6-tetraoxabicyclo[2.2.1]heptane ( <b>2k</b> )                    | S84 |
| IR of 1,4-Dimethyl-7-(1-phenylethyl)-2,3,5,6-tetraoxabicyclo[2.2.1]heptane ( <b>2l</b> )           | S85 |
| IR of 1,4-Dimethyl-7-[1-(4-methylphenyl)ethyl]-2,3,5,6-tetraoxabicyclo[2.2.1]heptane ( <b>2m</b> ) | S86 |
| IR of 7-[1-(4-Bromophenyl)ethyl]-1,4-dimethyl-2,3,5,6-tetraoxabicyclo[2.2.1]heptane                | S87 |

|                                                                                                                 |     |
|-----------------------------------------------------------------------------------------------------------------|-----|
| <b>(2n)</b>                                                                                                     |     |
| IR of 1,7-Dimethyl-4-phenyl-2,3,5,6-tetraoxabicyclo[2.2.1]heptane ( <b>2o</b> )                                 | S88 |
| IR of 7-Benzyl-1-methyl-4-phenyl-2,3,5,6-tetraoxabicyclo[2.2.1]heptane ( <b>2p</b> )                            | S89 |
| IR of 1,4-Diphenyl-7-methyl-2,3,5,6-tetraoxabicyclo[2.2.1]heptane ( <b>2q</b> )                                 | S90 |
| IR of 7-Benzyl-1,4-diphenyl-2,3,5,6-tetraoxabicyclo[2.2.1]heptanes ( <b>2r</b> )                                | S91 |
| <b>Monitoring of the PMA-catalyzed reaction of pentane-2,4-dione 1a with H<sub>2</sub>O<sub>2</sub></b>         | S92 |
| <b>Monitoring of the PMA-catalyzed reaction of 3-benzylpentane-2,4-dione 1k with H<sub>2</sub>O<sub>2</sub></b> | S96 |

# NMR spectra of $\beta$ -diketones

## 6-Methylheptane-2,4-dione (1b)

|                        |                |                      |              |                       |                      |
|------------------------|----------------|----------------------|--------------|-----------------------|----------------------|
| Acquisition Time (sec) | 0.6759         | Comment              | NMR.50059953 | Date                  | 13 Mar 2012 12:41:36 |
| File Name              |                |                      |              | Frequency (MHz)       | 300.13               |
| Nucleus                | <sup>1</sup> H | Number of Transients | 1            | Original Points Count | 8124                 |
| Pulse Sequence         | zg             | Solvent              | CHLOROFORM-D | Points Count          | 8192                 |
| Temperature (degree C) | 27.000         |                      |              | Sweep Width (Hz)      | 6009.62              |

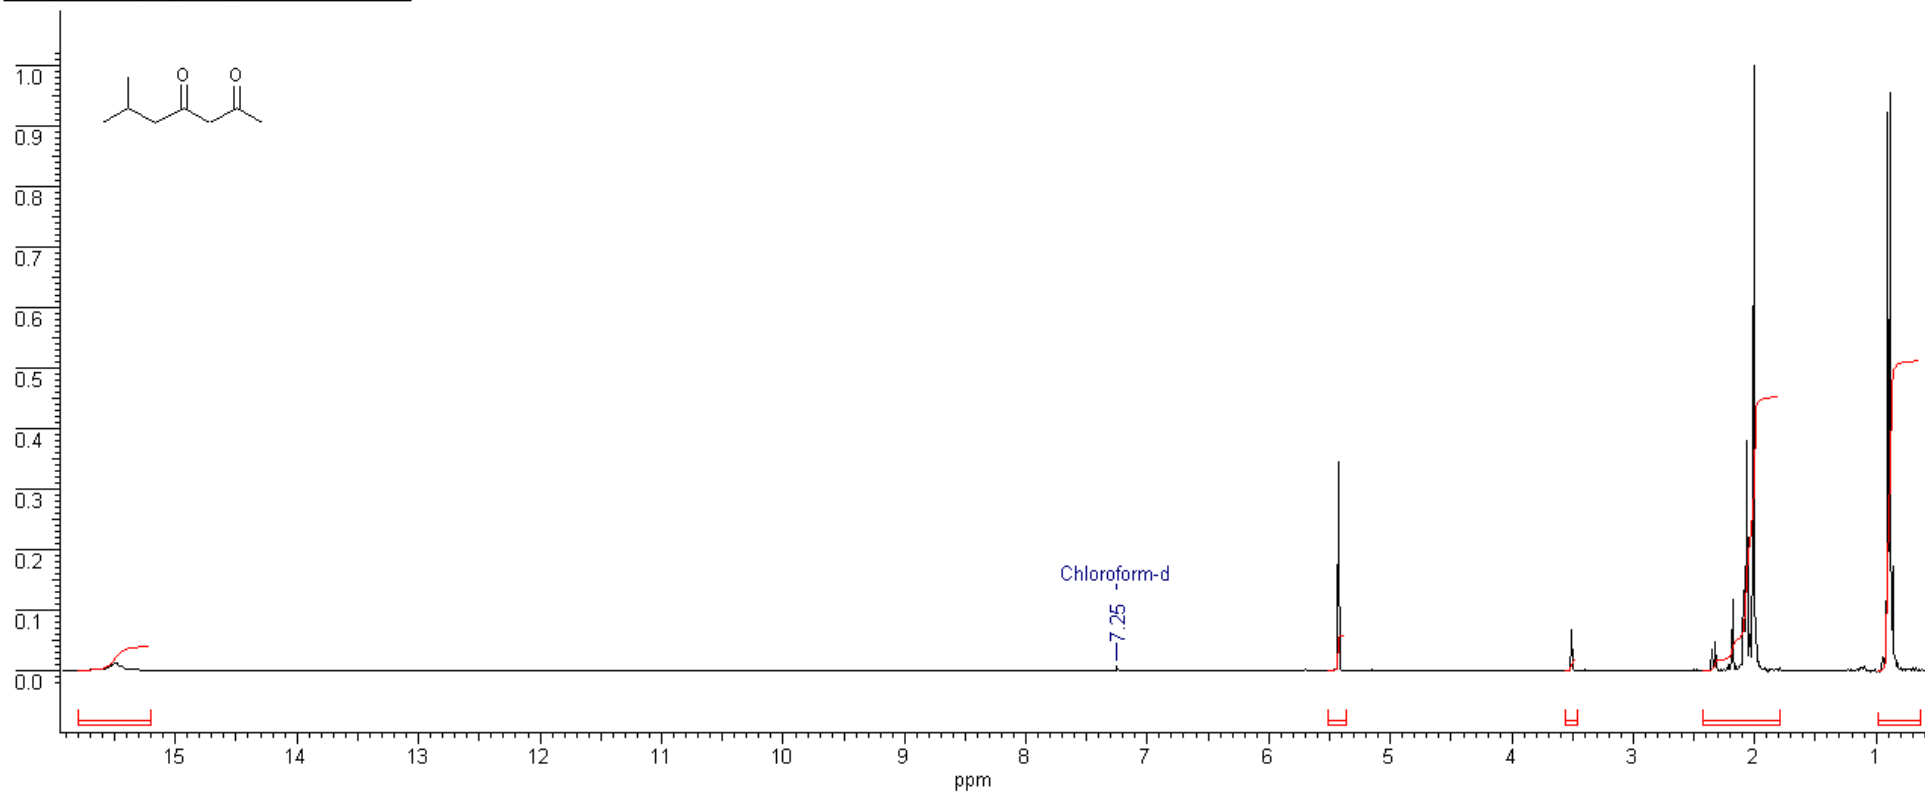

| No. | Annotation   | (ppm) |
|-----|--------------|-------|
| 1   | Chloroform-d | 7.25  |

### 7-Methyloctane-3,5-dione (1c)

|                               |                |                             |              |                              |                                 |
|-------------------------------|----------------|-----------------------------|--------------|------------------------------|---------------------------------|
| <b>Acquisition Time (sec)</b> | 0.6759         | <b>Comment</b>              | NMR50059953  | <b>Date</b>                  | 27 Mar 2012 12:16:00            |
| <b>File Name</b>              |                |                             |              | <b>Frequency (MHz)</b>       | 300.13                          |
| <b>Nucleus</b>                | <sup>1</sup> H | <b>Number of Transients</b> | 1            | <b>Original Points Count</b> | 8124                            |
| <b>Pulse Sequence</b>         | zg             | <b>Solvent</b>              | CHLOROFORM-D | <b>Points Count</b>          | 8192                            |
| <b>Temperature (degree C)</b> | 25.400         |                             |              |                              | <b>Sweep Width (Hz)</b> 6009.62 |

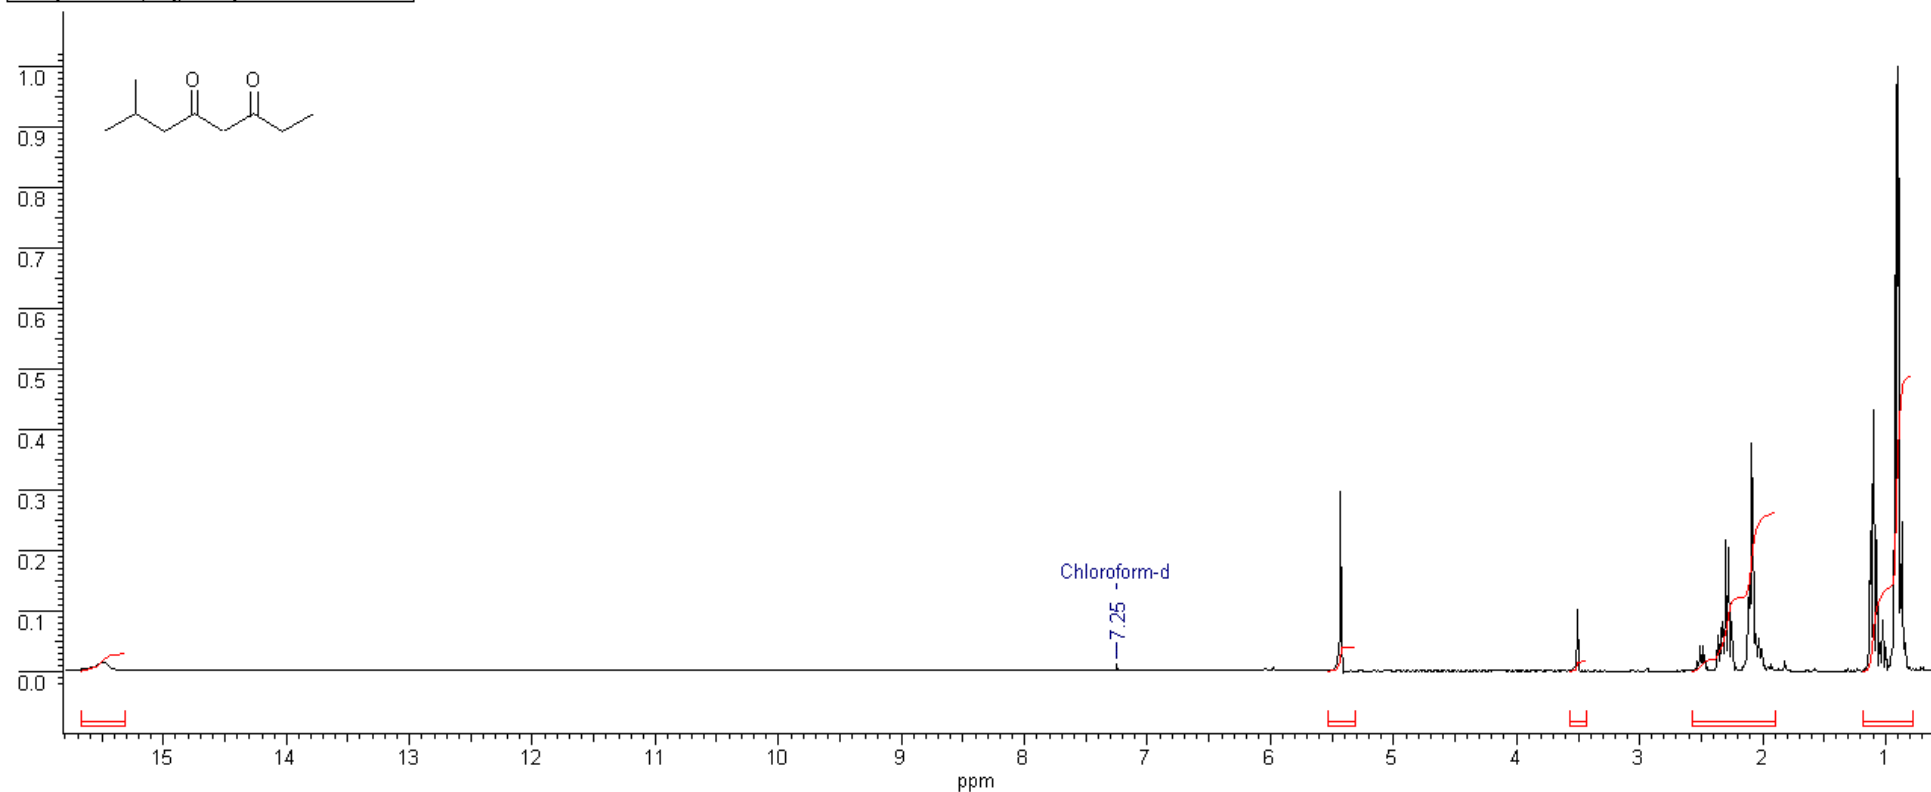

| No. | Annotation   | (ppm) |
|-----|--------------|-------|
| 1   | Chloroform-d | 7.25  |



### 1-(1-Adamantyl)butane-1,3-dione (1e)

|                               |                |                             |              |                              |                                 |
|-------------------------------|----------------|-----------------------------|--------------|------------------------------|---------------------------------|
| <b>Acquisition Time (sec)</b> | 0.6759         | <b>Comment</b>              | /VMIG S520   | <b>Date</b>                  | 24 Nov 2011 14:21:52            |
| <b>File Name</b>              |                |                             |              | <b>Frequency (MHz)</b>       | 300.13                          |
| <b>Nucleus</b>                | <sup>1</sup> H | <b>Number of Transients</b> | 1            | <b>Original Points Count</b> | 8124                            |
| <b>Pulse Sequence</b>         | zg             | <b>Solvent</b>              | CHLOROFORM-D | <b>Points Count</b>          | 8192                            |
| <b>Temperature (degree C)</b> | 26.800         |                             |              |                              | <b>Sweep Width (Hz)</b> 6009.62 |

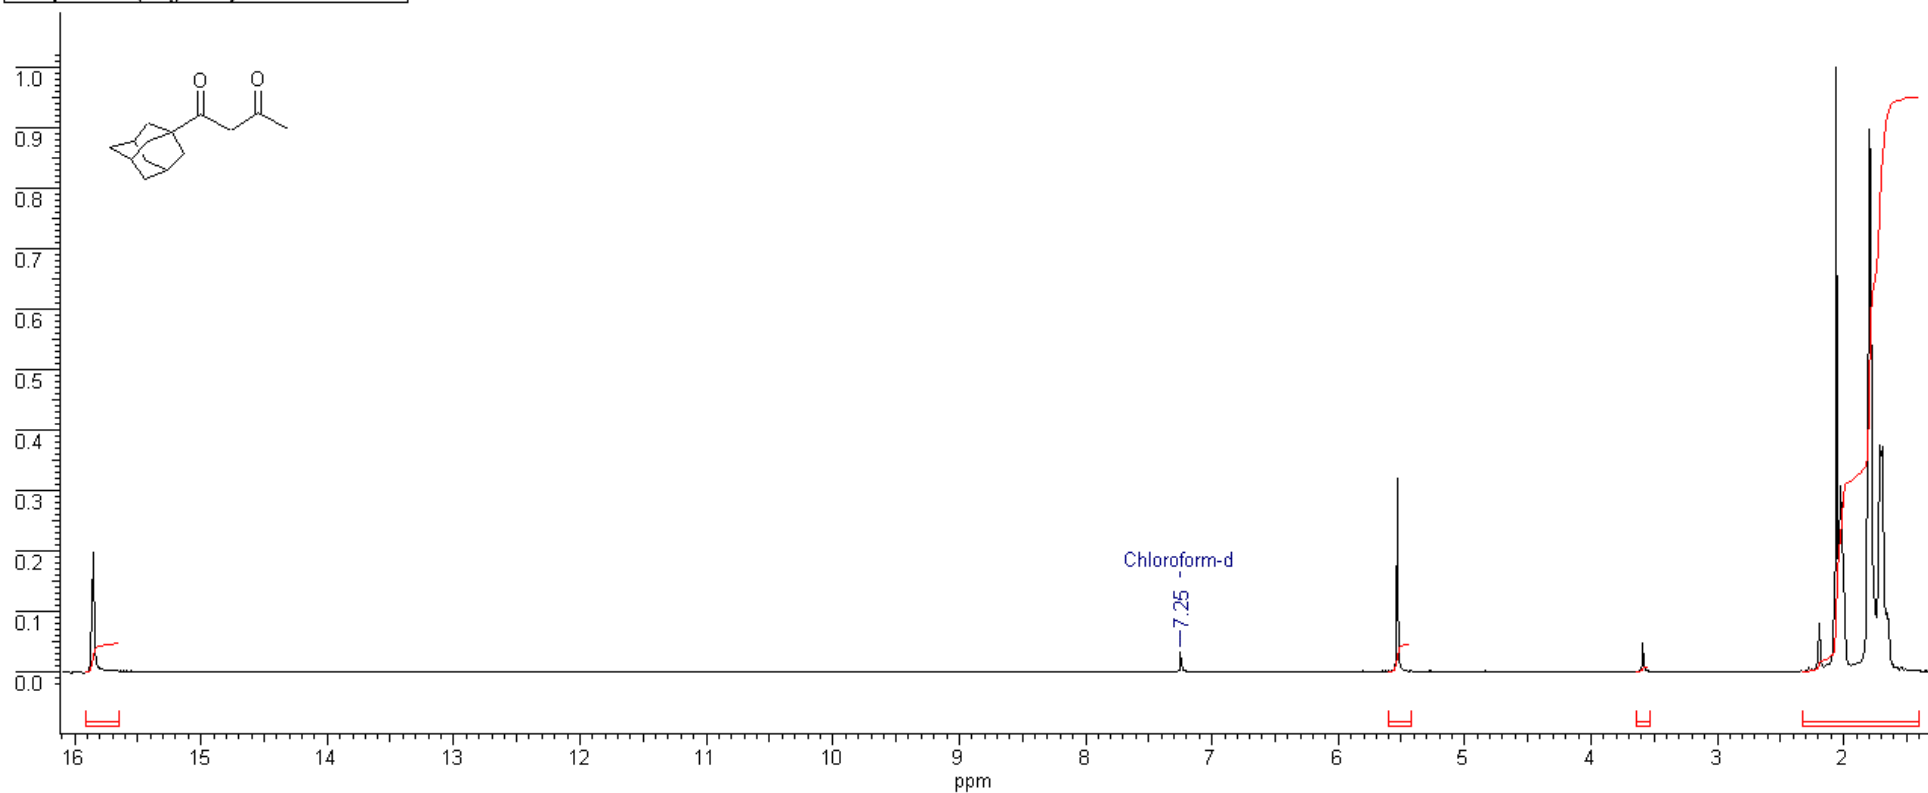

| No. | Annotation   | (ppm) |
|-----|--------------|-------|
| 1   | Chloroform-d | 7.25  |

# 1-(1-Adamantyl)pentane-1,3-dione (1f)

|                               |                |                             |              |                              |                                 |
|-------------------------------|----------------|-----------------------------|--------------|------------------------------|---------------------------------|
| <b>Acquisition Time (sec)</b> | 0.6759         | <b>Comment</b>              | /VMIG S520   | <b>Date</b>                  | 10 Jan 2012 14:36:48            |
| <b>File Name</b>              |                |                             |              | <b>Frequency (MHz)</b>       | 300.13                          |
| <b>Nucleus</b>                | <sup>1</sup> H | <b>Number of Transients</b> | 1            | <b>Original Points Count</b> | 8124                            |
| <b>Pulse Sequence</b>         | zg             | <b>Solvent</b>              | CHLOROFORM-D | <b>Points Count</b>          | 8192                            |
| <b>Temperature (degree C)</b> | 27.000         |                             |              |                              | <b>Sweep Width (Hz)</b> 6009.62 |

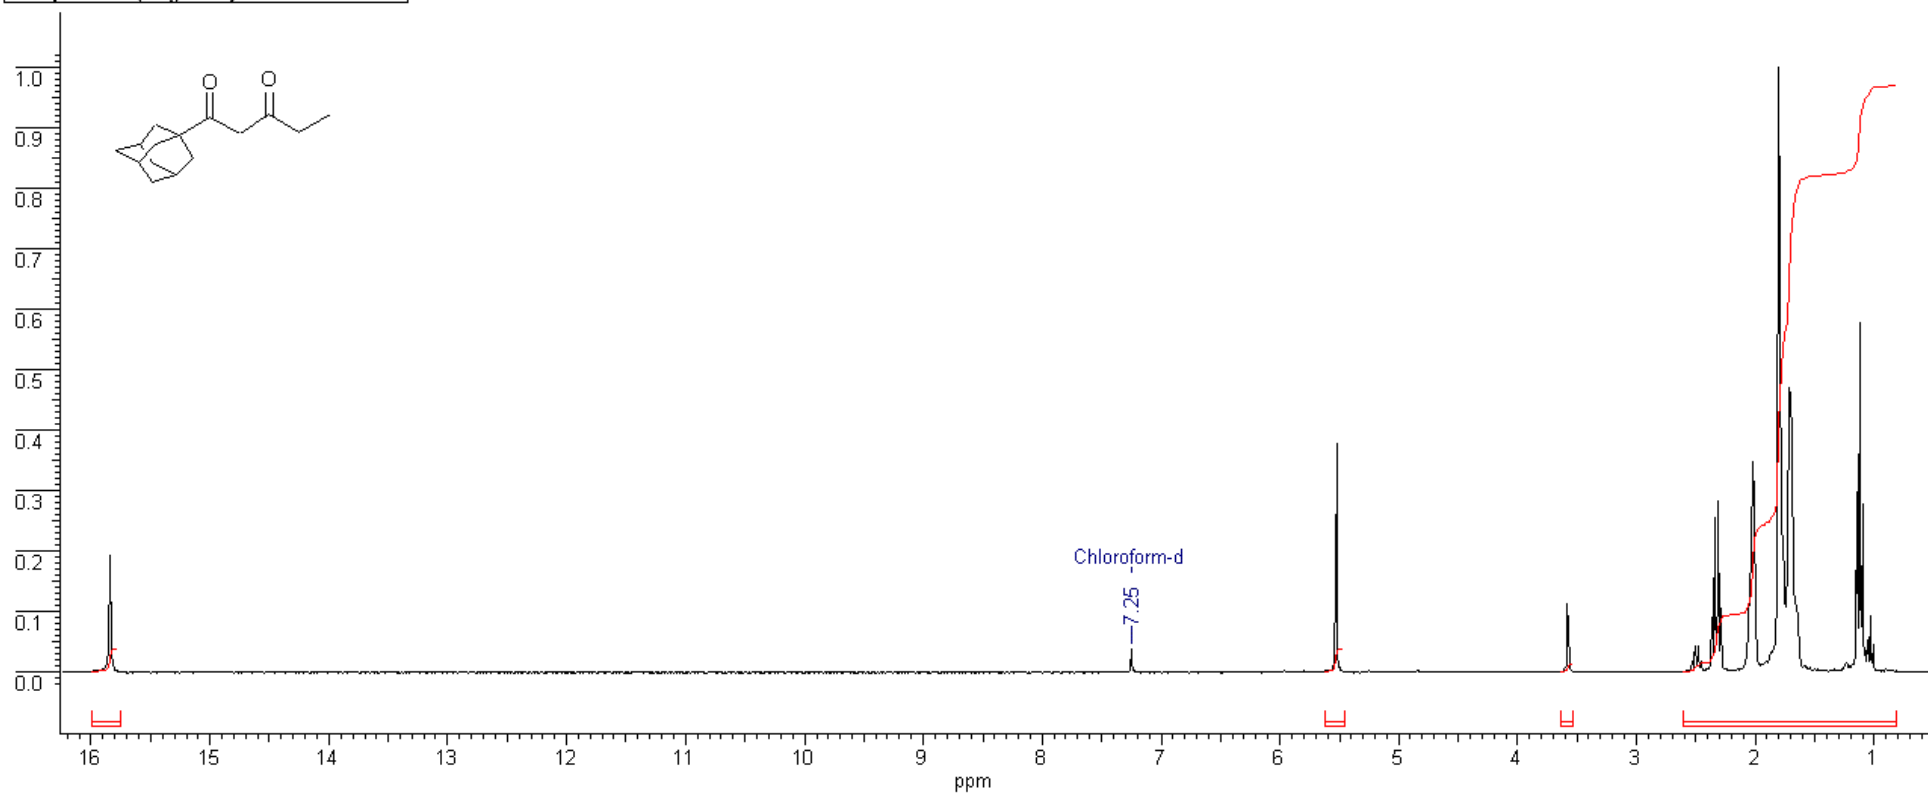

| No. | Annotation   | (ppm) |
|-----|--------------|-------|
| 1   | Chloroform-d | 7.25  |

### 3-Hexyl-2,4-pentanedione (1g)

|                               |                |                             |              |                              |                                 |
|-------------------------------|----------------|-----------------------------|--------------|------------------------------|---------------------------------|
| <b>Acquisition Time (sec)</b> | 0.6759         | <b>Comment</b>              | NMR/50059953 | <b>Date</b>                  | 14 May 2012 09:12:32            |
| <b>File Name</b>              |                |                             |              | <b>Frequency (MHz)</b>       | 300.13                          |
| <b>Nucleus</b>                | <sup>1</sup> H | <b>Number of Transients</b> | 1            | <b>Original Points Count</b> | 8124                            |
| <b>Pulse Sequence</b>         | zg             | <b>Solvent</b>              | CHLOROFORM-D | <b>Points Count</b>          | 8192                            |
| <b>Temperature (degree C)</b> | 25.300         |                             |              |                              | <b>Sweep Width (Hz)</b> 6009.62 |

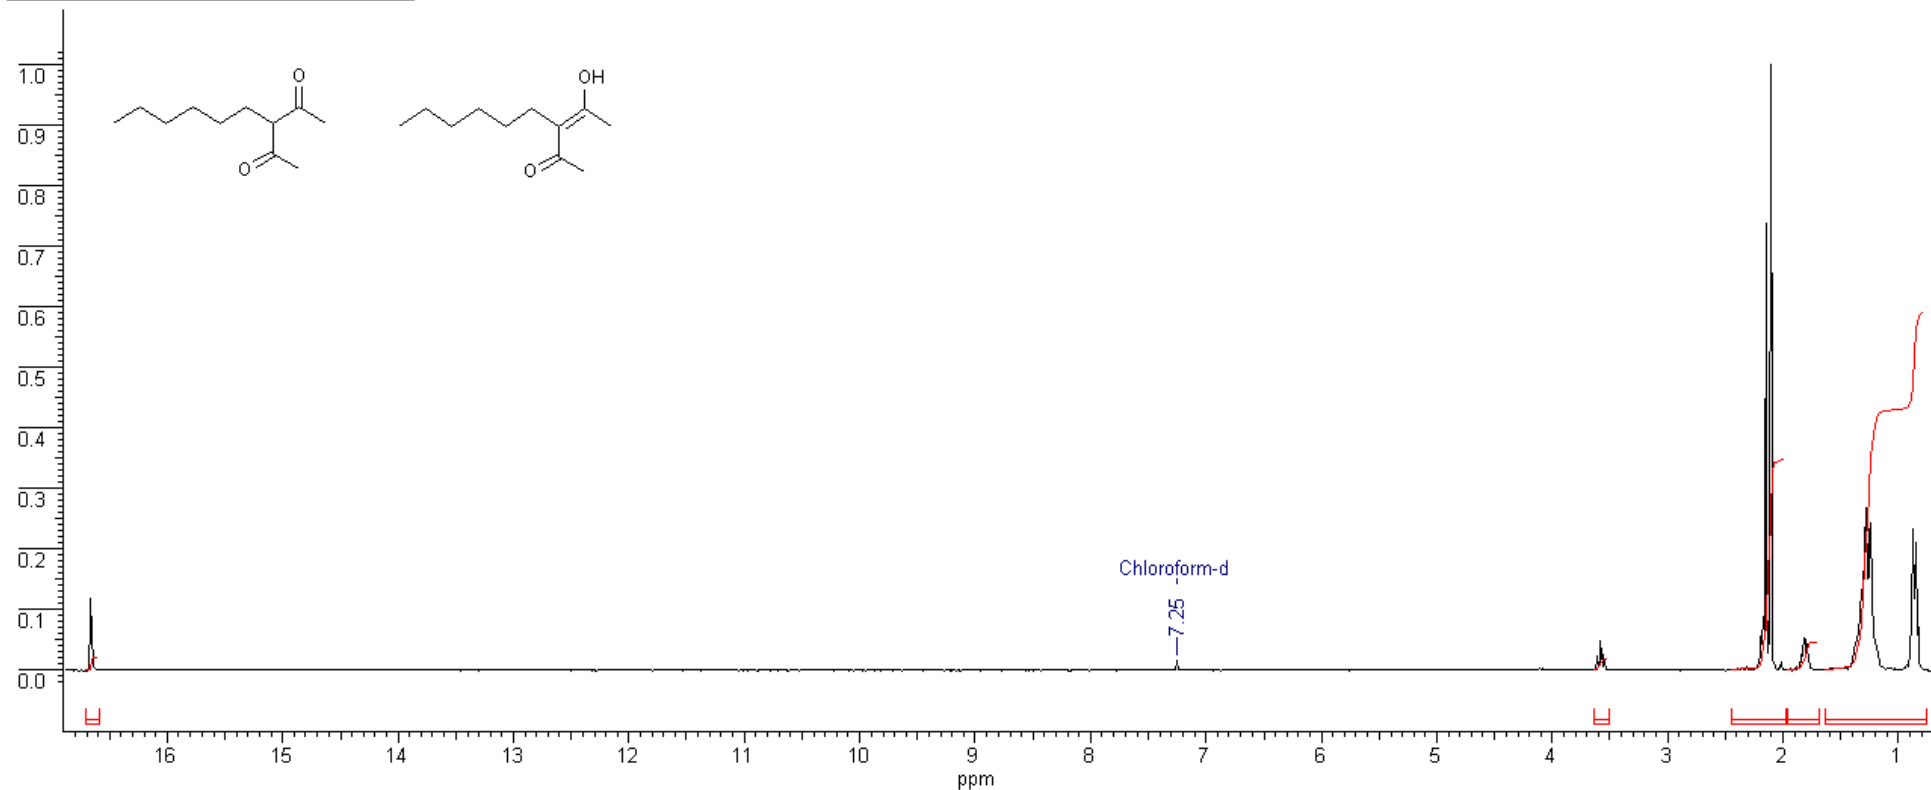

| No. | Annotation   | (ppm) |
|-----|--------------|-------|
| 1   | Chloroform-d | 7.25  |

### 3-Allylpentane-2,4-dione (1h)

|                               |                |                             |                               |                              |                      |
|-------------------------------|----------------|-----------------------------|-------------------------------|------------------------------|----------------------|
| <b>Acquisition Time (sec)</b> | 0.6759         | <b>Comment</b>              | Avance-300, CDCl <sub>3</sub> | <b>Date</b>                  | 08 Jun 2011 09:33:52 |
| <b>File Name</b>              |                |                             |                               | <b>Frequency (MHz)</b>       | 300.13               |
| <b>Nucleus</b>                | <sup>1</sup> H | <b>Number of Transients</b> | 1                             | <b>Original Points Count</b> | 8124                 |
| <b>Pulse Sequence</b>         | zg             | <b>Solvent</b>              | CHLOROFORM-D                  | <b>Points Count</b>          | 8192                 |
| <b>Temperature (degree C)</b> | 27.000         |                             |                               | <b>Sweep Width (Hz)</b>      | 6009.62              |

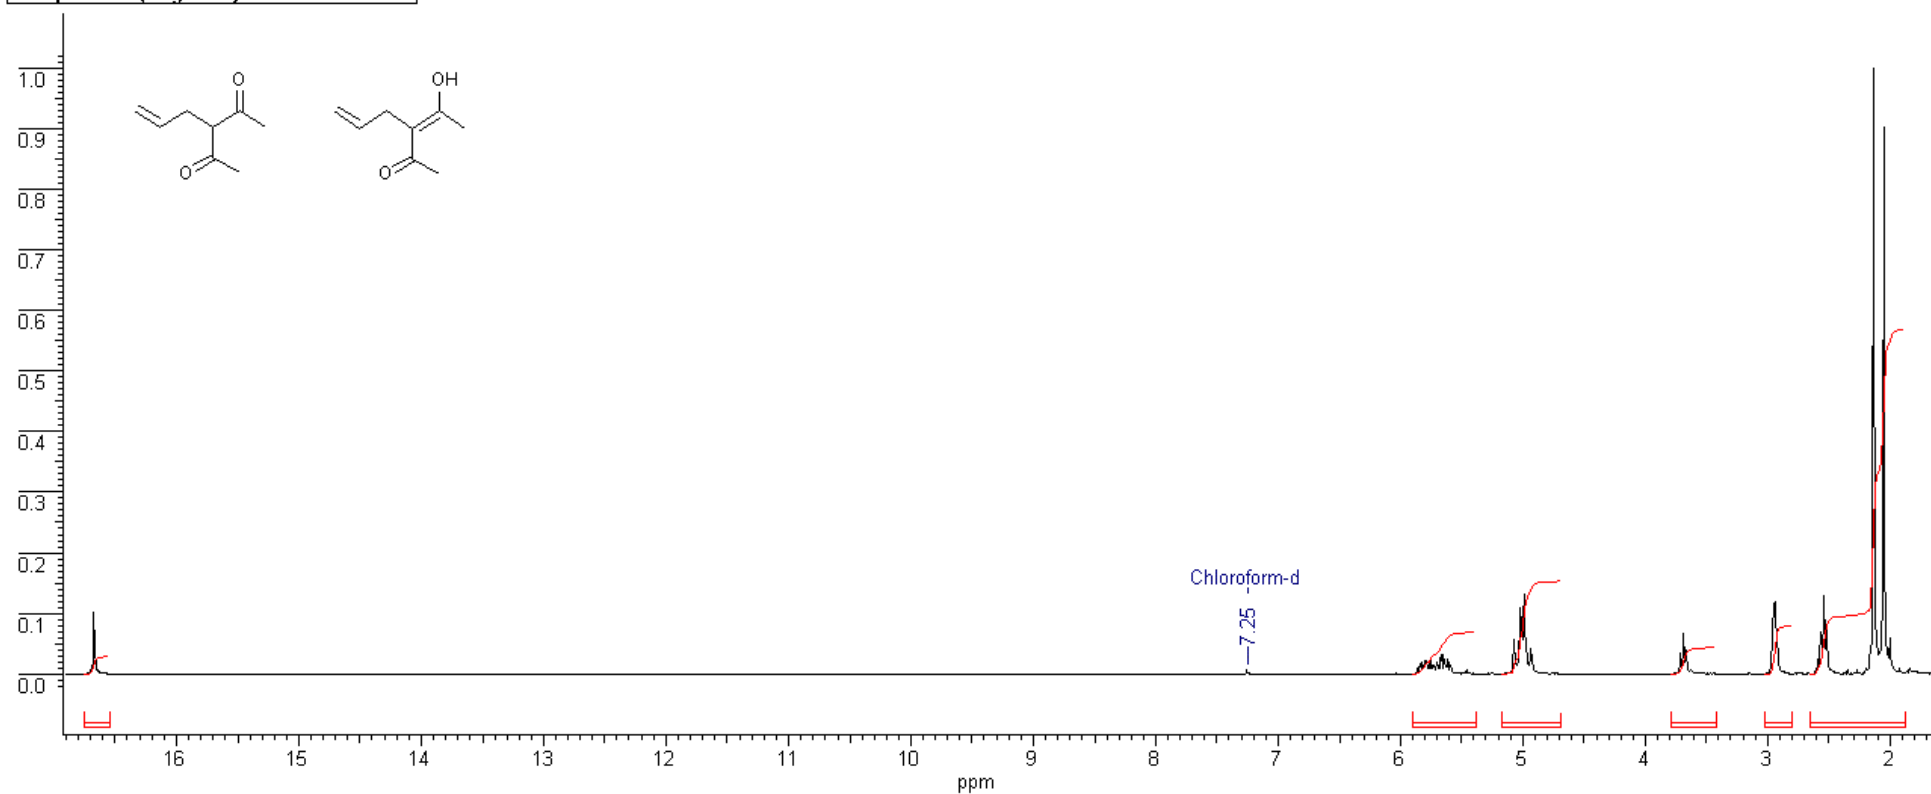

| No. | Annotation   | (ppm) |
|-----|--------------|-------|
| 1   | Chloroform-d | 7.25  |

### 3-(1-Adamantyl)pentane-2,4-dione (1i)

|                               |                |                             |              |                              |                      |
|-------------------------------|----------------|-----------------------------|--------------|------------------------------|----------------------|
| <b>Acquisition Time (sec)</b> | 0.6759         | <b>Comment</b>              | NMR/50059953 | <b>Date</b>                  | 01 Feb 2012 10:50:40 |
| <b>File Name</b>              |                |                             |              | <b>Frequency (MHz)</b>       | 300.13               |
| <b>Nucleus</b>                | <sup>1</sup> H | <b>Number of Transients</b> | 1            | <b>Original Points Count</b> | 8124                 |
| <b>Pulse Sequence</b>         | zg3            | <b>Solvent</b>              | CHLOROFORM-D | <b>Points Count</b>          | 8192                 |
| <b>Temperature (degree C)</b> | 24.700         |                             |              | <b>Sweep Width (Hz)</b>      | 6009.62              |

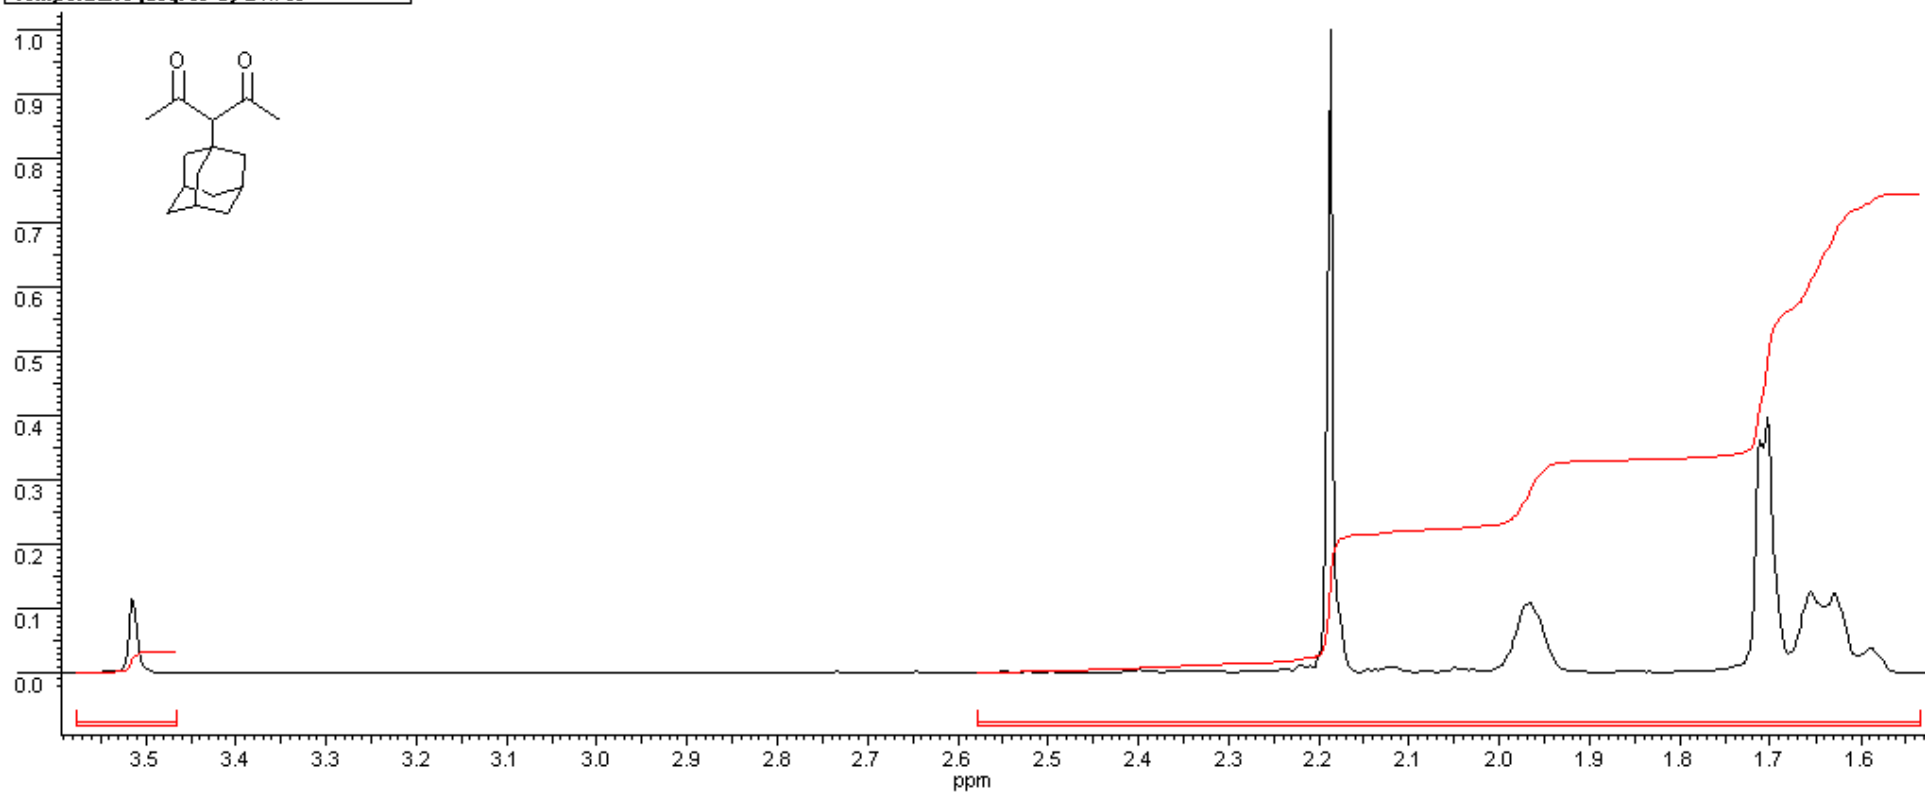

| No. | Annotation   | (ppm) |
|-----|--------------|-------|
| 1   | Chloroform-d | 7.25  |

### 3-(1-Adamantyl)-6-methylheptane-2,4-dione (1j)

|                               |                |                             |              |                              |                      |
|-------------------------------|----------------|-----------------------------|--------------|------------------------------|----------------------|
| <b>Acquisition Time (sec)</b> | 0.6759         | <b>Comment</b>              | NMR/50059953 | <b>Date</b>                  | 10 May 2012 09:57:20 |
| <b>File Name</b>              |                |                             |              | <b>Frequency (MHz)</b>       | 300.13               |
| <b>Nucleus</b>                | <sup>1</sup> H | <b>Number of Transients</b> | 1            | <b>Original Points Count</b> | 8124                 |
| <b>Pulse Sequence</b>         | zg3            | <b>Solvent</b>              | CHLOROFORM-D | <b>Points Count</b>          | 8192                 |
| <b>Temperature (degree C)</b> | 24.900         |                             |              | <b>Sweep Width (Hz)</b>      | 6009.62              |

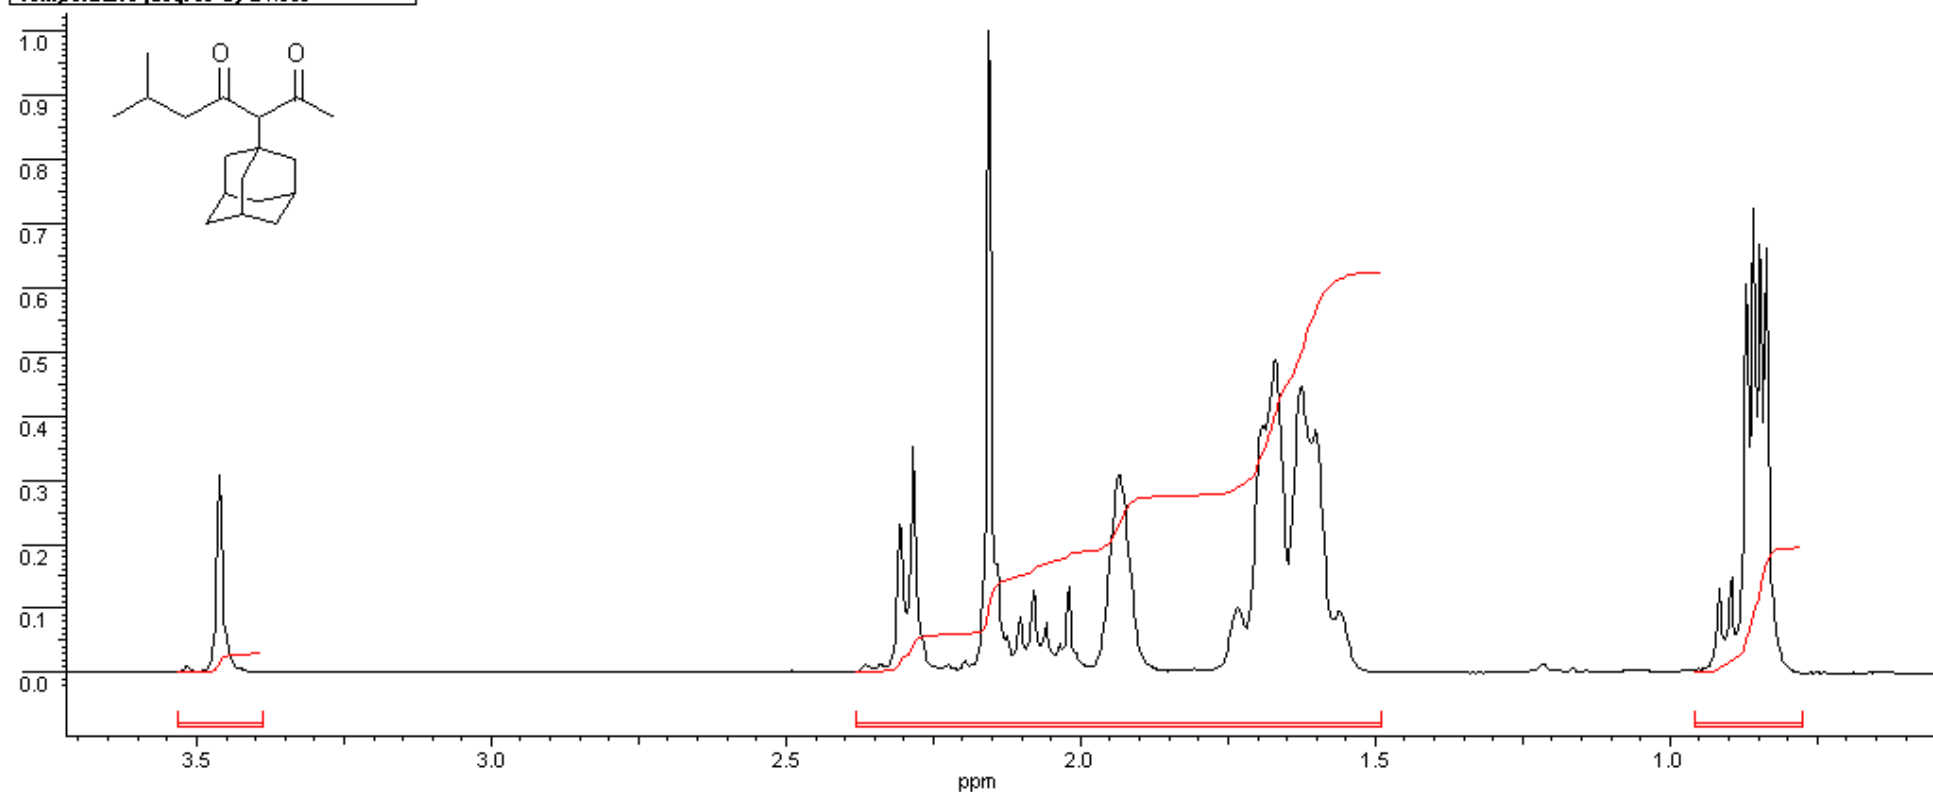

| No. | Annotation   | (ppm) |
|-----|--------------|-------|
| 1   | Chloroform-d | 7.25  |

### 3-(1-Adamantyl)-6-methylheptane-2,4-dione (1j)

|                               |            |                             |                         |                              |          |                               |                      |
|-------------------------------|------------|-----------------------------|-------------------------|------------------------------|----------|-------------------------------|----------------------|
| <b>Acquisition Time (sec)</b> | 0.4322     | <b>Comment</b>              | Avance-300, C-13, CDCl3 |                              |          | <b>Date</b>                   | 04 May 2012 16:04:16 |
| <b>File Name</b>              |            |                             |                         |                              |          | <b>Frequency (MHz)</b>        | 75.48                |
| <b>Nucleus</b>                | 13C        | <b>Number of Transients</b> | 125                     | <b>Original Points Count</b> | 16308    | <b>Points Count</b>           | 16384                |
| <b>Pulse Sequence</b>         | zgpg60base | <b>Solvent</b>              | CHLOROFORM-D            | <b>Sweep Width (Hz)</b>      | 18867.92 | <b>Temperature (degree C)</b> | 27.600               |

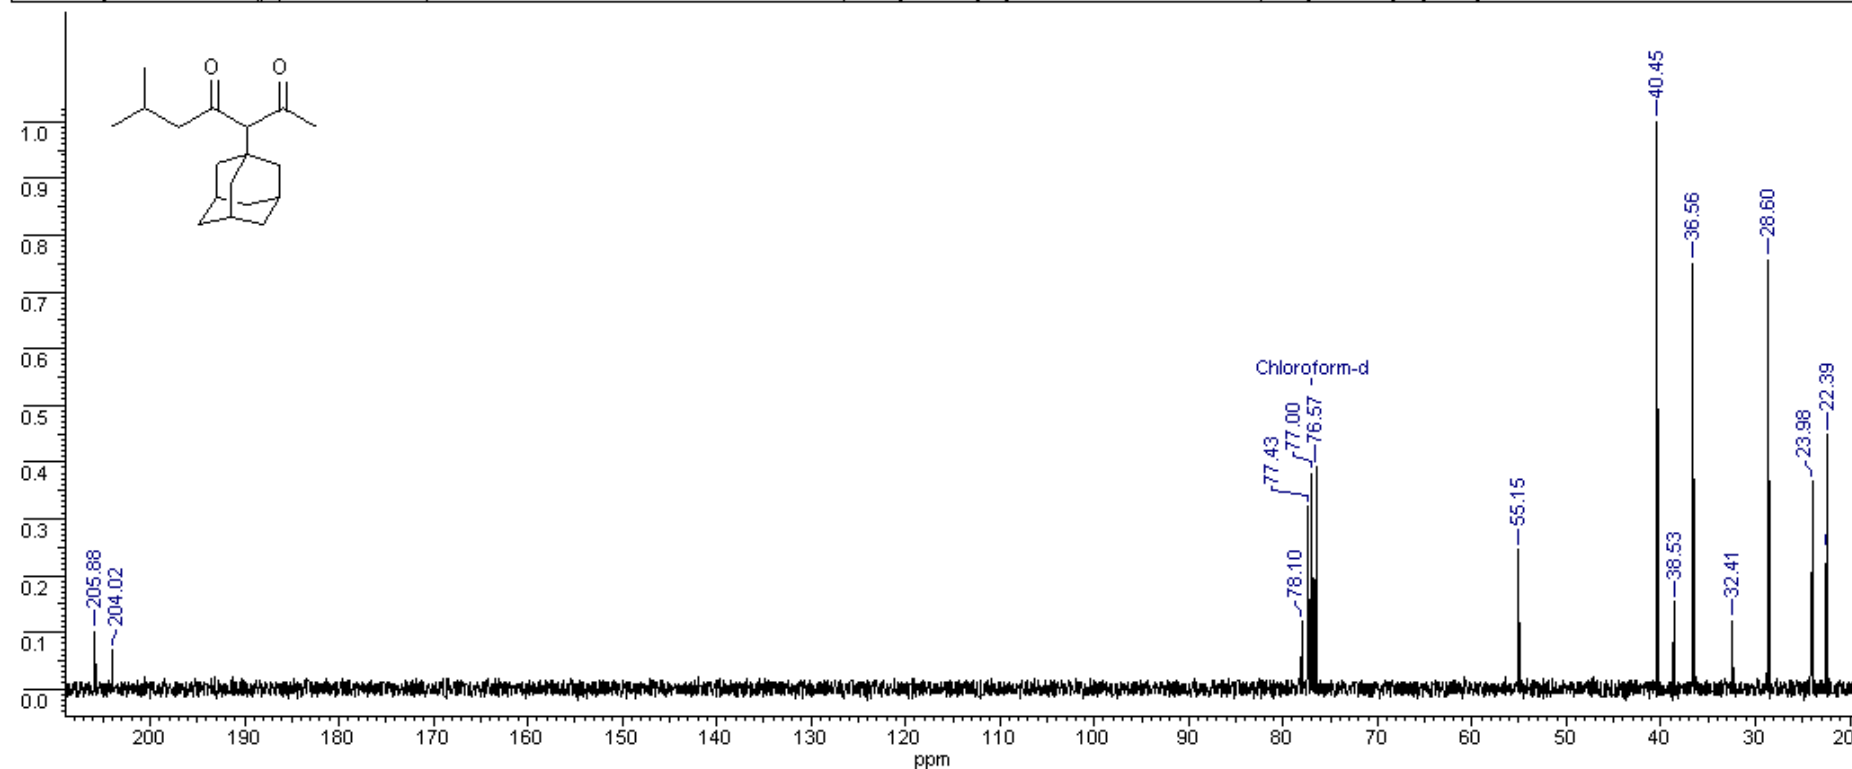

| No. | (ppm) | (Hz)   | Height | No. | (ppm)  | (Hz)    | Height |
|-----|-------|--------|--------|-----|--------|---------|--------|
| 1   | 22.39 | 1689.8 | 0.4491 | 9   | 55.15  | 4162.4  | 0.2453 |
| 2   | 22.46 | 1695.5 | 0.2440 | 10  | 76.57  | 5779.4  | 0.3915 |
| 3   | 23.98 | 1809.6 | 0.3651 | 11  | 77.00  | 5811.6  | 0.3797 |
| 4   | 28.60 | 2158.5 | 0.7563 | 12  | 77.43  | 5843.9  | 0.3202 |
| 5   | 32.41 | 2446.4 | 0.1208 | 13  | 78.10  | 5894.6  | 0.1189 |
| 6   | 36.56 | 2759.7 | 0.7505 | 14  | 204.02 | 15398.2 | 0.0681 |
| 7   | 38.53 | 2908.3 | 0.1529 | 15  | 205.88 | 15538.7 | 0.1008 |
| 8   | 40.45 | 3053.4 | 1.0000 |     |        |         |        |

| No. | Annotation   | (ppm) |
|-----|--------------|-------|
| 1   | Chloroform-d | 77.00 |

### 3-Benzylpentane-2,4-dione (1k)

|                               |                |                             |                               |                              |                      |
|-------------------------------|----------------|-----------------------------|-------------------------------|------------------------------|----------------------|
| <b>Acquisition Time (sec)</b> | 0.6759         | <b>Comment</b>              | Avance-300, CDCl <sub>3</sub> | <b>Date</b>                  | 18 May 2011 12:43:44 |
| <b>File Name</b>              |                |                             |                               | <b>Frequency (MHz)</b>       | 300.13               |
| <b>Nucleus</b>                | <sup>1</sup> H | <b>Number of Transients</b> | 1                             | <b>Original Points Count</b> | 8124                 |
| <b>Pulse Sequence</b>         | zg             | <b>Solvent</b>              | CHLOROFORM-D                  | <b>Points Count</b>          | 8192                 |
| <b>Temperature (degree C)</b> | 22.500         |                             |                               | <b>Sweep Width (Hz)</b>      | 6009.62              |

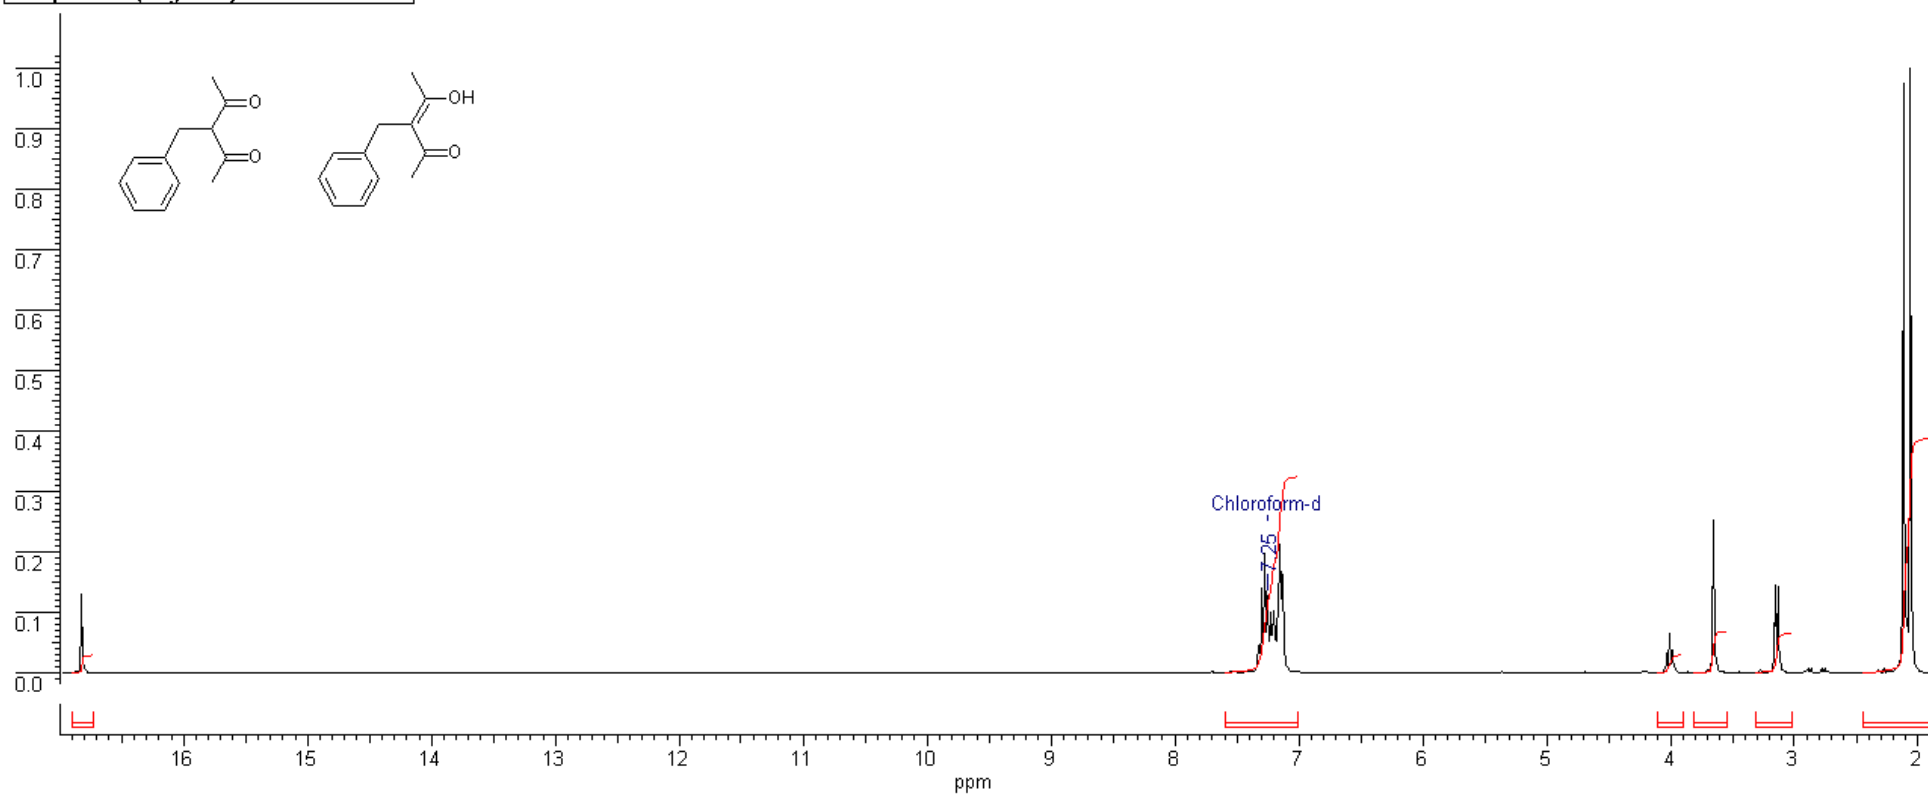

| No. | Annotation   | (ppm) |
|-----|--------------|-------|
| 1   | Chloroform-d | 7.25  |



### 3-(1-Phenylethyl)pentane-2,4-dione (1l)

|                               |                |                             |                   |                              |                      |
|-------------------------------|----------------|-----------------------------|-------------------|------------------------------|----------------------|
| <b>Acquisition Time (sec)</b> | 0.5416         | <b>Comment</b>              | Avance-300, CDC13 | <b>Date</b>                  | 03 Jun 2011 14:36:48 |
| <b>File Name</b>              |                |                             |                   | <b>Frequency (MHz)</b>       | 300.13               |
| <b>Nucleus</b>                | <sup>1</sup> H | <b>Number of Transients</b> | 1                 | <b>Original Points Count</b> | 8124                 |
| <b>Pulse Sequence</b>         | zg             | <b>Solvent</b>              | CHLOROFORM-D      | <b>Points Count</b>          | 8192                 |
| <b>Temperature (degree C)</b> | 25.300         |                             |                   | <b>Sweep Width (Hz)</b>      | 7500.00              |

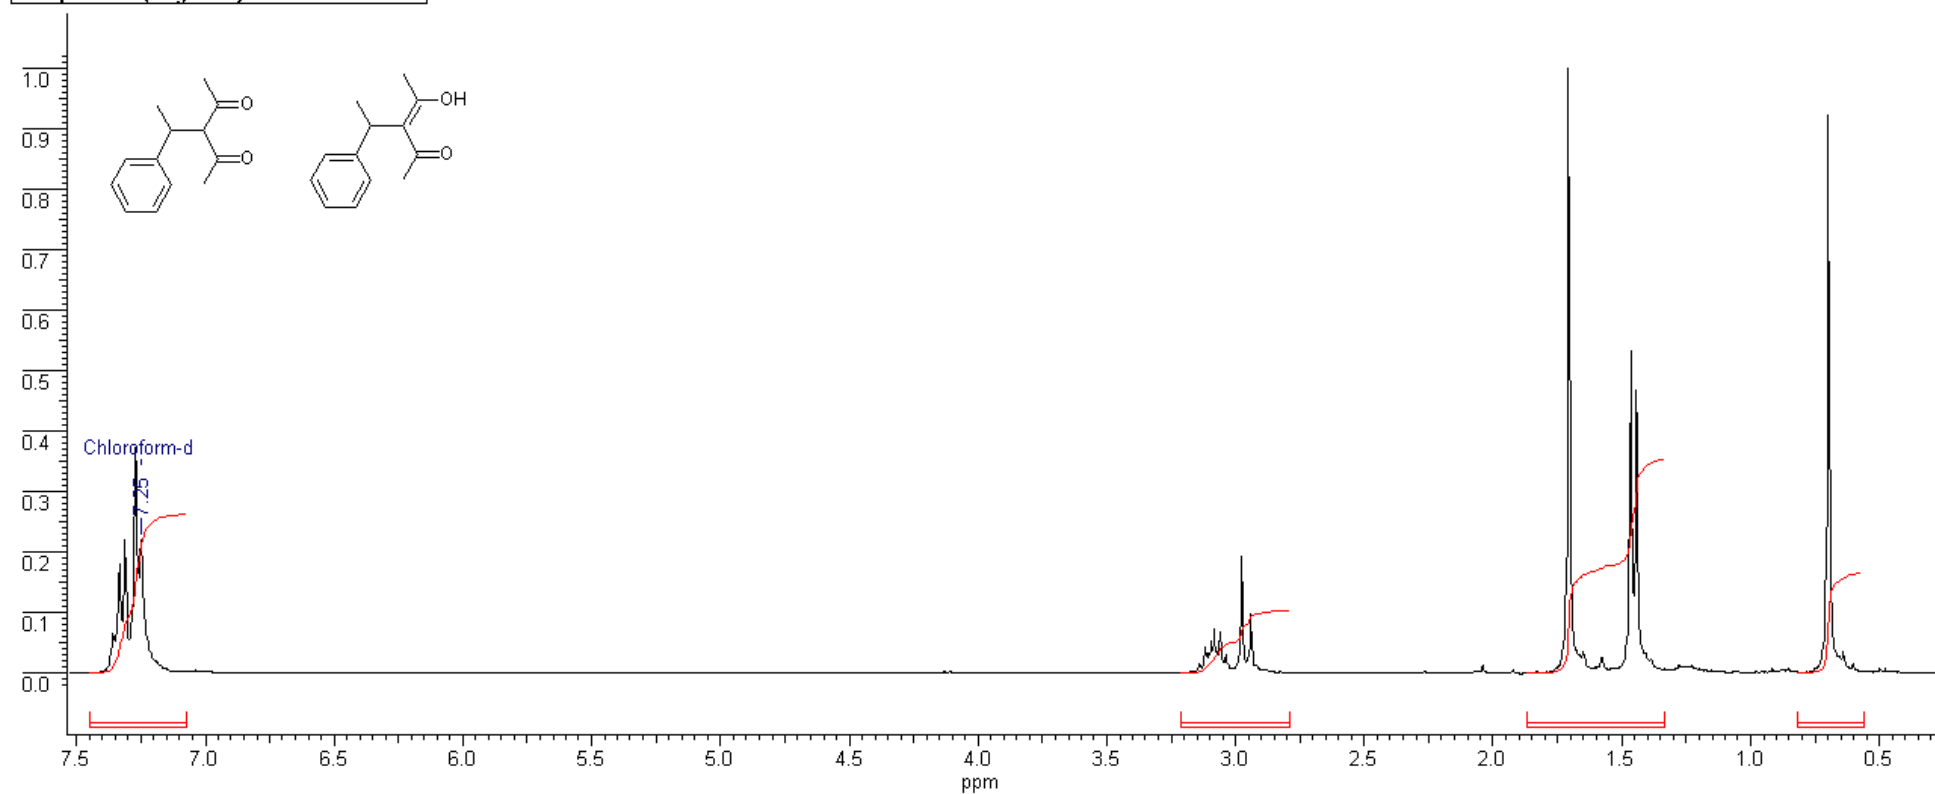

| No. | Annotation   | (ppm) |
|-----|--------------|-------|
| 1   | Chloroform-d | 7.26  |

### 3-[1-(4-Methylphenyl)ethyl]pentane-2,4-dione (1m)

|                        |        |                      |                   |                       |                  |                      |      |
|------------------------|--------|----------------------|-------------------|-----------------------|------------------|----------------------|------|
| Acquisition Time (sec) | 0.6759 | Comment              | Avance-300, CDCIB |                       | Date             | 21 Jun 2011 09:55:12 |      |
| File Name              |        |                      |                   |                       | Frequency (MHz)  | 300.13               |      |
| Nucleus                | 1H     | Number of Transients | 1                 | Original Points Count | 8124             | Points Count         | 8192 |
| Pulse Sequence         | zg     | Solvent              | CHLOROFORM-D      |                       | Sweep Width (Hz) | 6009.62              |      |
| Temperature (degree C) | 25.700 |                      |                   |                       |                  |                      |      |

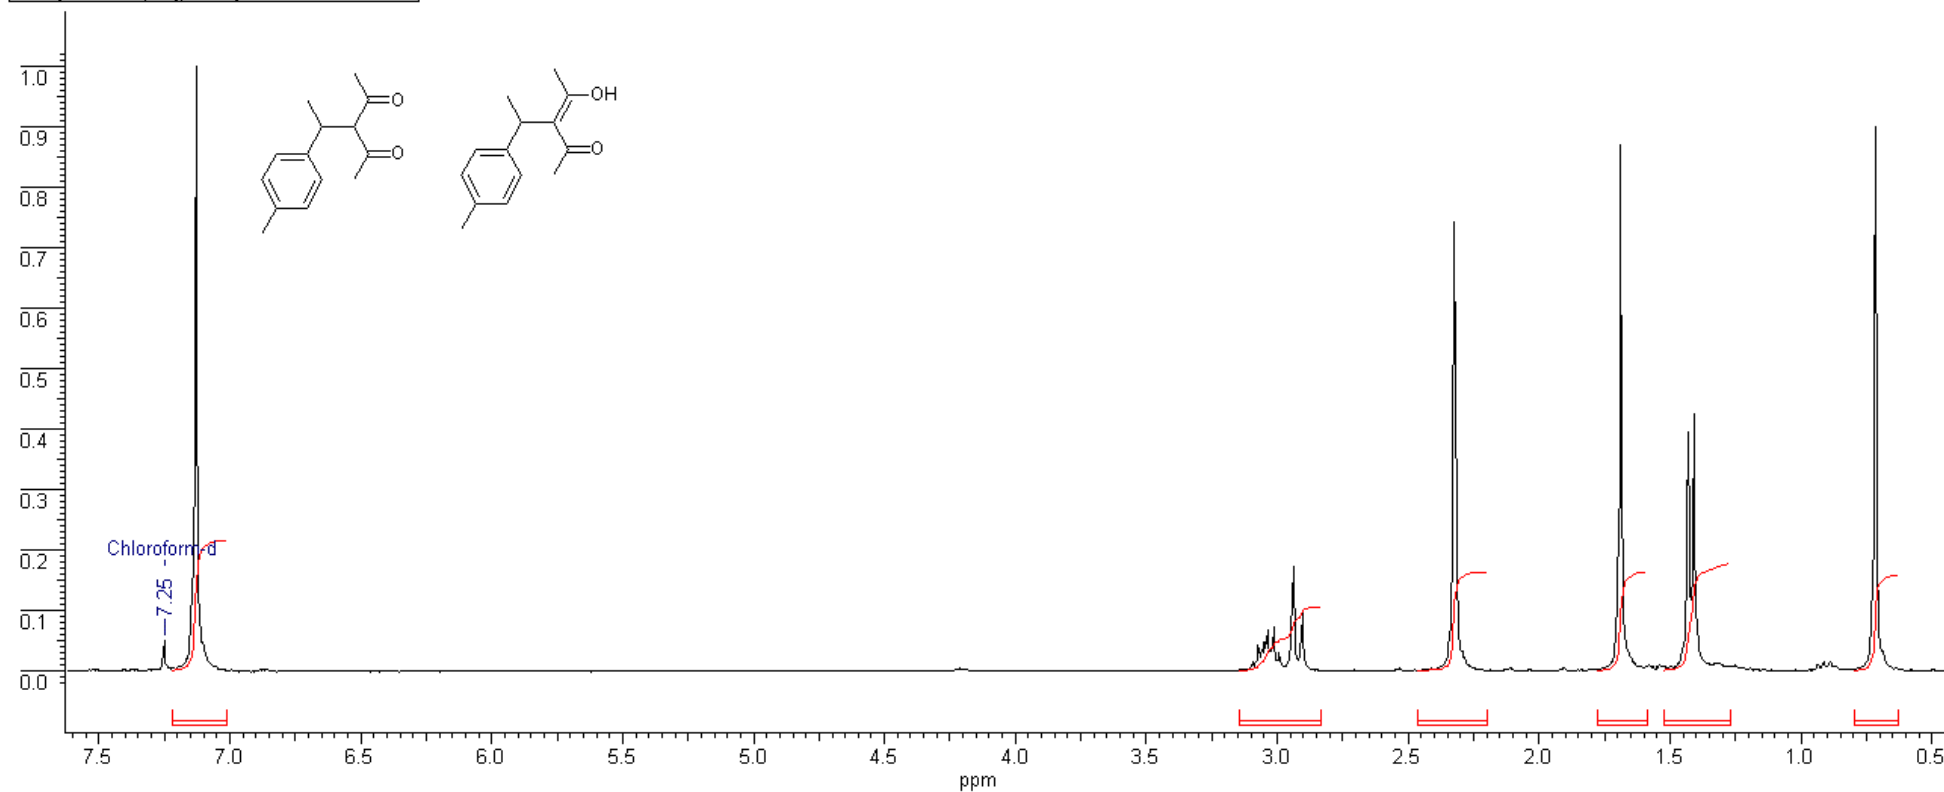

| No. | Annotation   | (ppm) |
|-----|--------------|-------|
| 1   | Chloroform-d | 7.25  |

### 3-[1-(4-Bromophenyl)ethyl]pentane-2,4-dione (1n)

|                               |                |                             |                               |                              |                      |
|-------------------------------|----------------|-----------------------------|-------------------------------|------------------------------|----------------------|
| <b>Acquisition Time (sec)</b> | 0.6759         | <b>Comment</b>              | Avance-300, CDCl <sub>3</sub> | <b>Date</b>                  | 14 Jun 2011 14:49:36 |
| <b>File Name</b>              |                |                             |                               | <b>Frequency (MHz)</b>       | 300.13               |
| <b>Nucleus</b>                | <sup>1</sup> H | <b>Number of Transients</b> | 1                             | <b>Original Points Count</b> | 8124                 |
| <b>Pulse Sequence</b>         | zg             | <b>Solvent</b>              | CHLOROFORM-D                  | <b>Points Count</b>          | 8192                 |
| <b>Temperature (degree C)</b> | 34.900         |                             |                               | <b>Sweep Width (Hz)</b>      | 6009.62              |

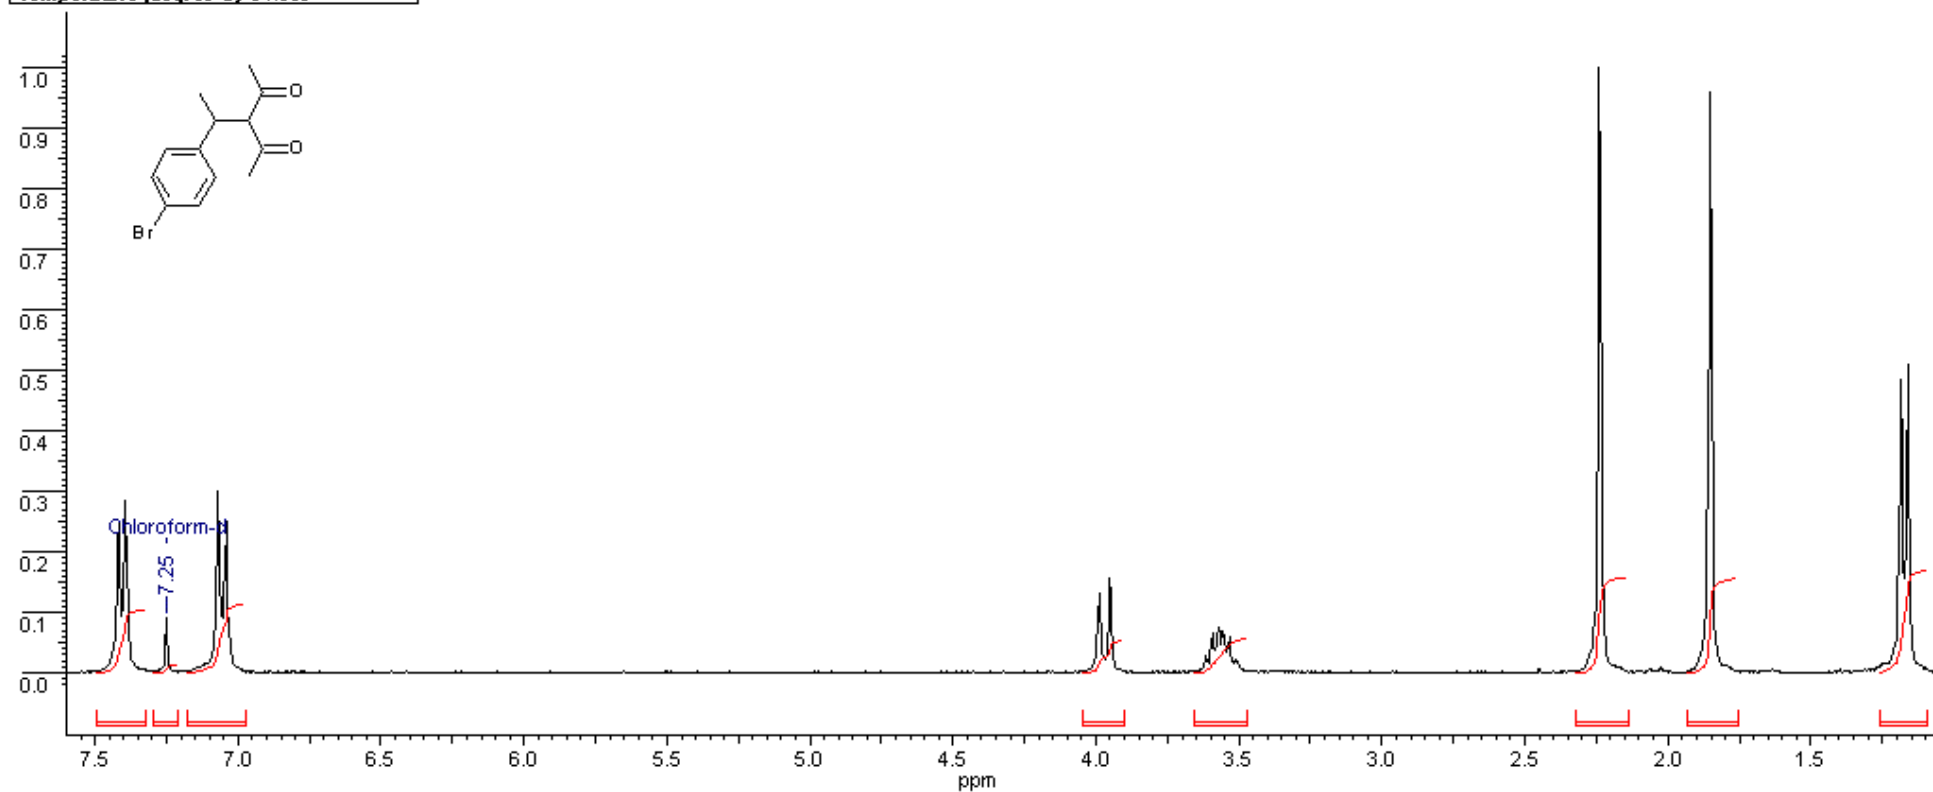

| No. | Annotation   | (ppm) |
|-----|--------------|-------|
| 1   | Chloroform-d | 7.25  |

### 2-Methyl-1-phenylbutane-1,3-dione (1o)

|                               |        |                             |                 |                              |                         |                      |      |
|-------------------------------|--------|-----------------------------|-----------------|------------------------------|-------------------------|----------------------|------|
| <b>Acquisition Time (sec)</b> | 0.6759 | <b>Comment</b>              | /TSFC mk1324.32 |                              | <b>Date</b>             | 14 Jul 2012 08:25:36 |      |
| <b>File Name</b>              |        |                             |                 |                              | <b>Frequency (MHz)</b>  | 300.13               |      |
| <b>Nucleus</b>                | 1H     | <b>Number of Transients</b> | 1               | <b>Original Points Count</b> | 8124                    | <b>Points Count</b>  | 8192 |
| <b>Pulse Sequence</b>         | zg     | <b>Solvent</b>              | CHLOROFORM-D    |                              | <b>Sweep Width (Hz)</b> | 6009.62              |      |
| <b>Temperature (degree C)</b> | 28.700 |                             |                 |                              |                         |                      |      |

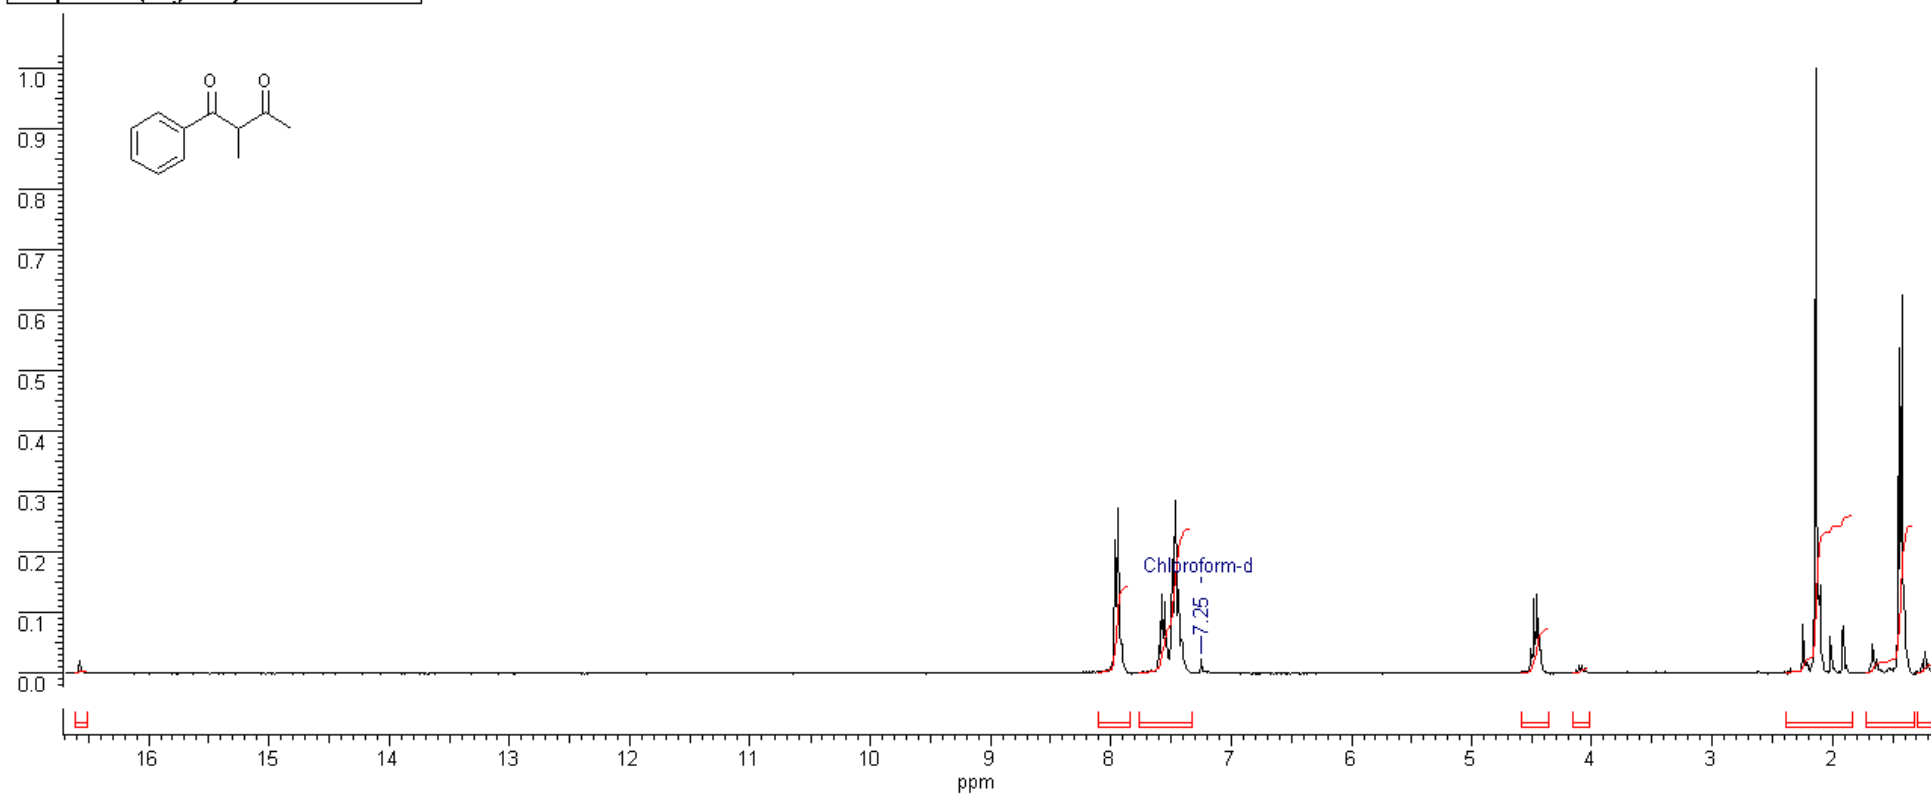

| No. | Annotation   | (ppm) |
|-----|--------------|-------|
| 1   | Chloroform-d | 7.25  |

## 2-Benzyl-1-phenylbutane-1,3-dione (1p)

|                               |                |                             |              |                              |                      |
|-------------------------------|----------------|-----------------------------|--------------|------------------------------|----------------------|
| <b>Acquisition Time (sec)</b> | 0.6759         | <b>Comment</b>              | NMR.50059953 | <b>Date</b>                  | 29 May 2012 10:05:52 |
| <b>File Name</b>              |                |                             |              | <b>Frequency (MHz)</b>       | 300.13               |
| <b>Nucleus</b>                | <sup>1</sup> H | <b>Number of Transients</b> | 1            | <b>Original Points Count</b> | 8124                 |
| <b>Pulse Sequence</b>         | zg             | <b>Solvent</b>              | CHLOROFORM-D | <b>Points Count</b>          | 8192                 |
| <b>Temperature (degree C)</b> | 26.100         |                             |              | <b>Sweep Width (Hz)</b>      | 6009.62              |

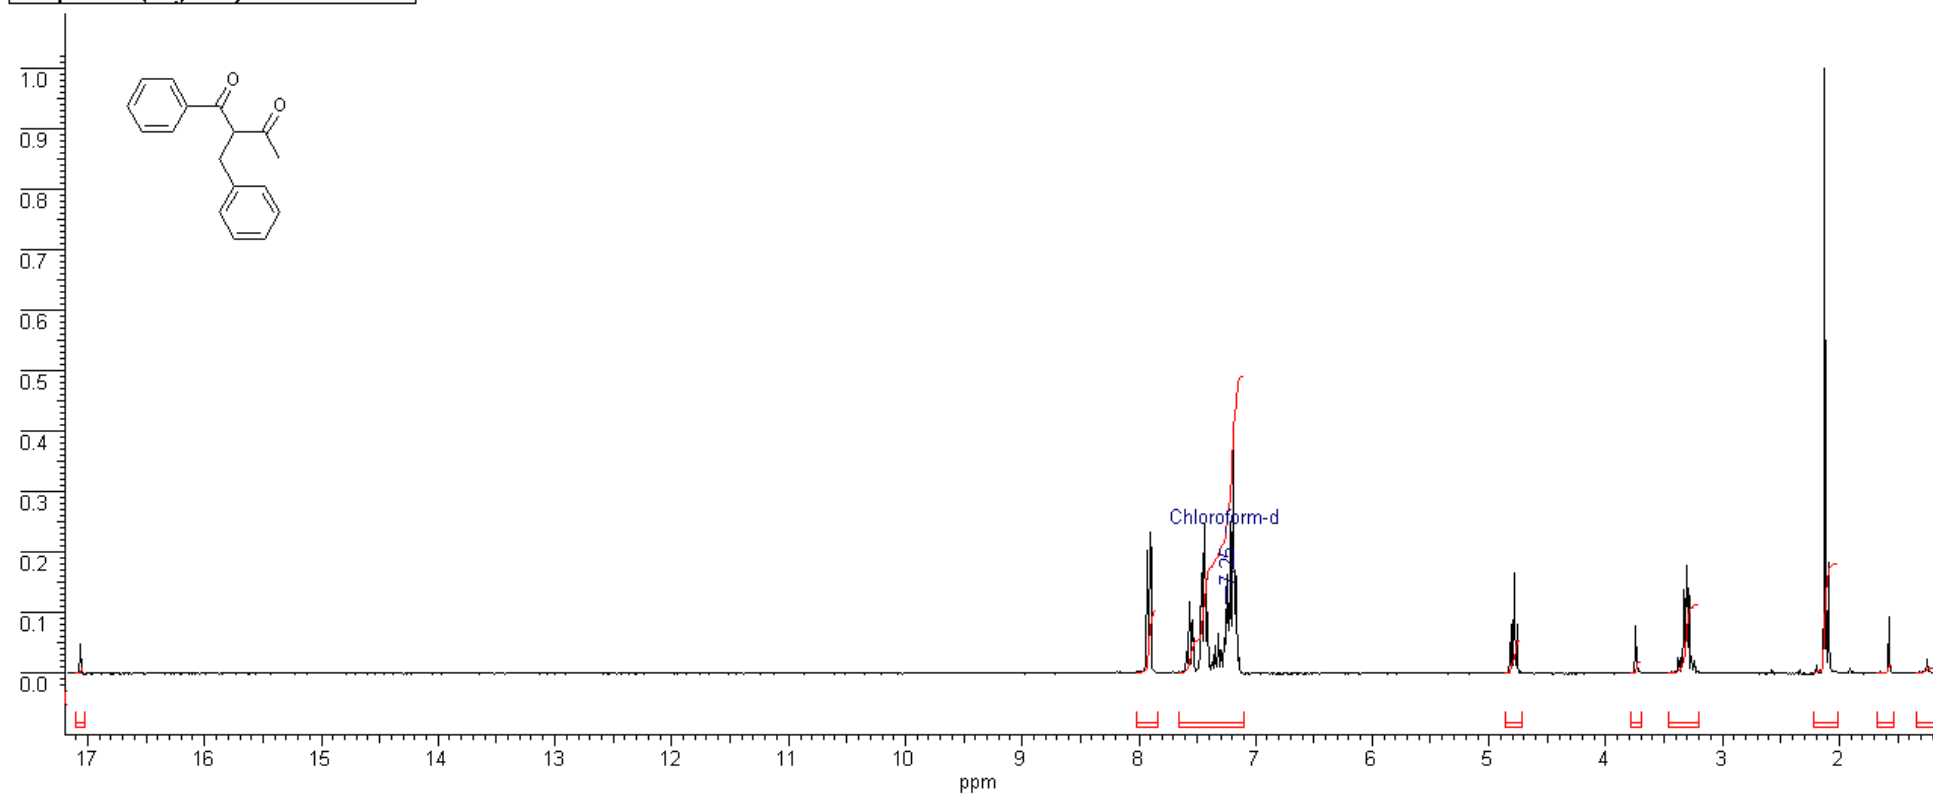

| No. | Annotation   | (ppm) |
|-----|--------------|-------|
| 1   | Chloroform-d | 7.25  |

## 2-Methyl-1,3-diphenylpropane-1,3-dione (1q)

|                               |                |                             |              |                              |                      |
|-------------------------------|----------------|-----------------------------|--------------|------------------------------|----------------------|
| <b>Acquisition Time (sec)</b> | 0.6759         | <b>Comment</b>              | NMR/50059953 | <b>Date</b>                  | 16 Jul 2012 14:00:32 |
| <b>File Name</b>              |                |                             |              | <b>Frequency (MHz)</b>       | 300.13               |
| <b>Nucleus</b>                | <sup>1</sup> H | <b>Number of Transients</b> | 1            | <b>Original Points Count</b> | 8124                 |
| <b>Pulse Sequence</b>         | zg             | <b>Solvent</b>              | CHLOROFORM-D | <b>Points Count</b>          | 8192                 |
| <b>Temperature (degree C)</b> | 28.700         |                             |              | <b>Sweep Width (Hz)</b>      | 6009.62              |

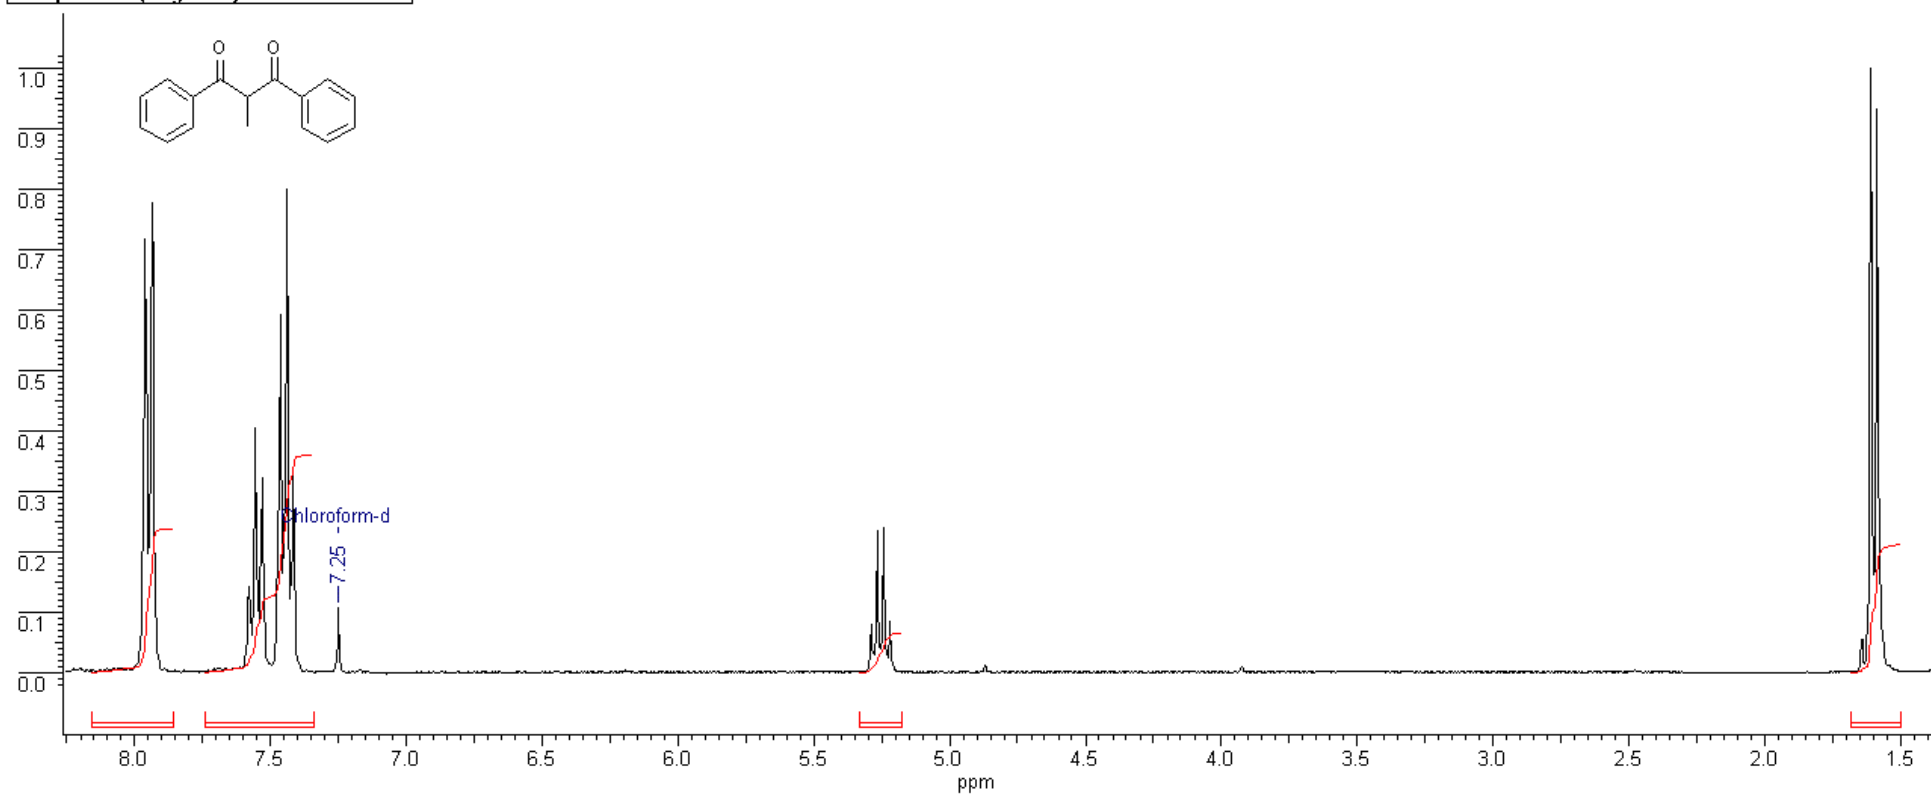

| No. | Annotation   | (ppm) |
|-----|--------------|-------|
| 1   | Chloroform-d | 7.25  |

### 2-Benzyl-1,3-diphenylpropane-1,3-dione (1r)

|                               |                |                             |              |                              |                      |
|-------------------------------|----------------|-----------------------------|--------------|------------------------------|----------------------|
| <b>Acquisition Time (sec)</b> | 0.6759         | <b>Comment</b>              | AGOR NH0023  | <b>Date</b>                  | 25 Jul 2012 10:14:24 |
| <b>File Name</b>              |                |                             |              | <b>Frequency (MHz)</b>       | 300.13               |
| <b>Nucleus</b>                | <sup>1</sup> H | <b>Number of Transients</b> | 1            | <b>Original Points Count</b> | 8124                 |
| <b>Pulse Sequence</b>         | zg             | <b>Solvent</b>              | CHLOROFORM-D | <b>Points Count</b>          | 8192                 |
| <b>Temperature (degree C)</b> | 27.500         |                             |              | <b>Sweep Width (Hz)</b>      | 6009.62              |

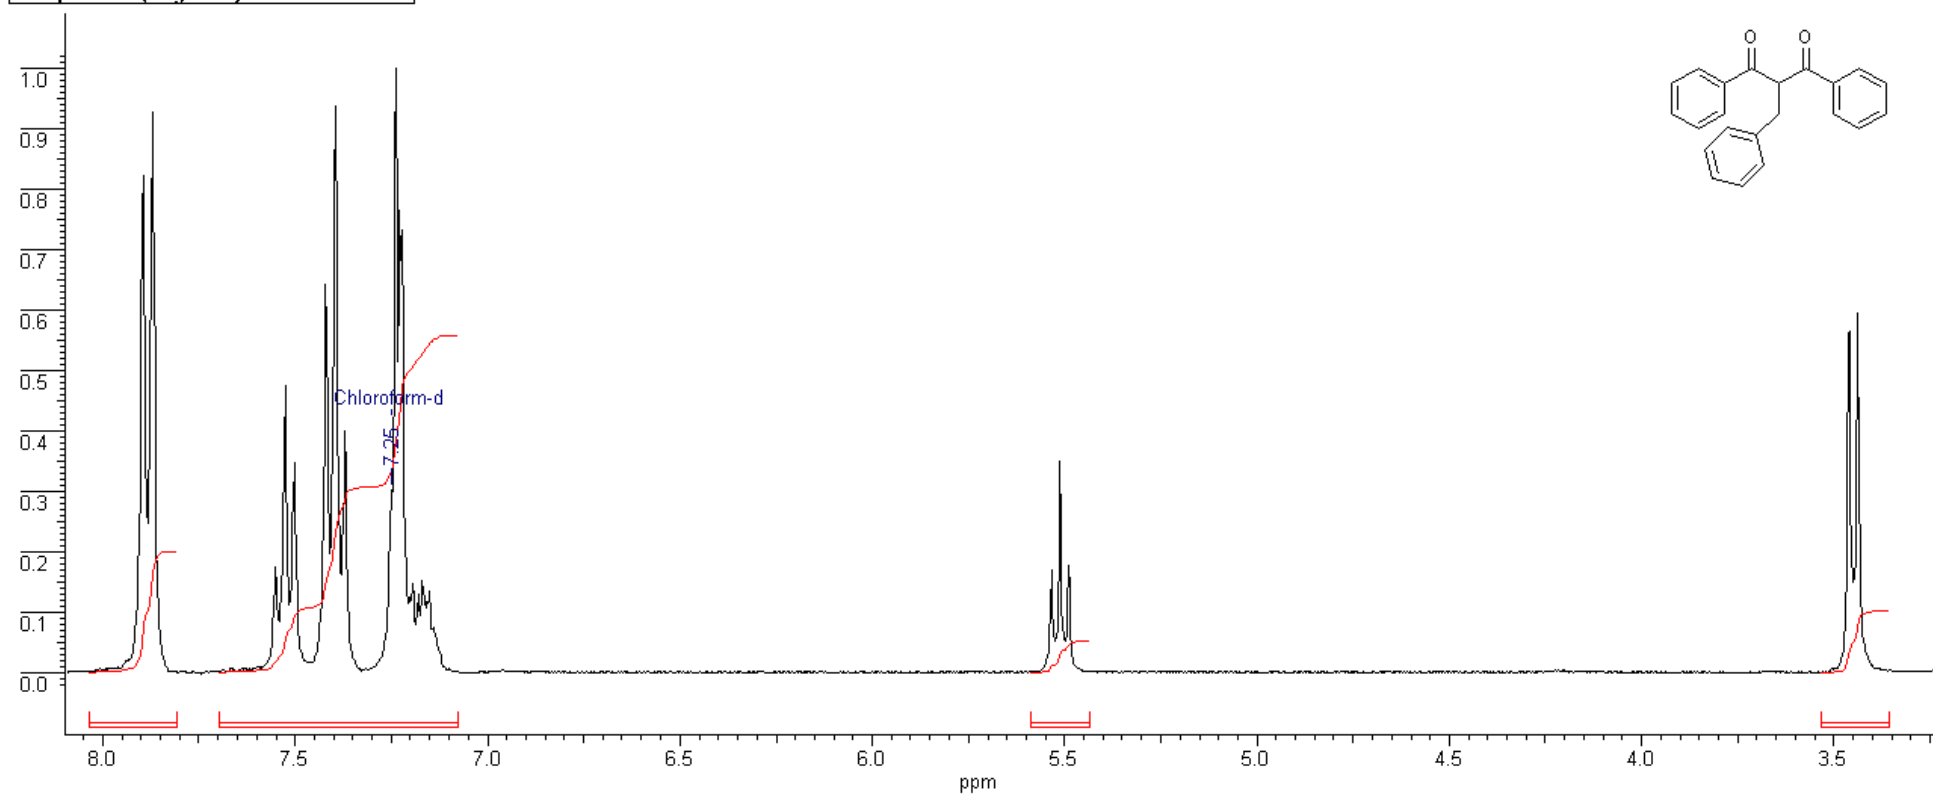

| No. | Annotation   | (ppm) |
|-----|--------------|-------|
| 1   | Chloroform-d | 7.25  |

## NMR spectra of tetraoxanes

### 1,4-Dimethyl-2,3,5,6-tetraoxabicyclo[2.2.1]heptane (2a)

|                        |        |                      |                      |                       |      |                  |         |
|------------------------|--------|----------------------|----------------------|-----------------------|------|------------------|---------|
| Acquisition Time (sec) | 1.3518 | Date                 | 06 Apr 2012 13:52:00 |                       |      |                  |         |
| File Name              |        |                      |                      |                       |      | Frequency (MHz)  | 300.13  |
| Nucleus                | 1H     | Number of Transients | 1                    | Original Points Count | 8124 | Points Count     | 8192    |
| Pulse Sequence         | zg     | Solvent              | CHLOROFORM-D         |                       |      | Sweep Width (Hz) | 6009.62 |
| Temperature (degree C) | 26.300 |                      |                      |                       |      |                  |         |

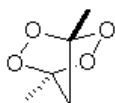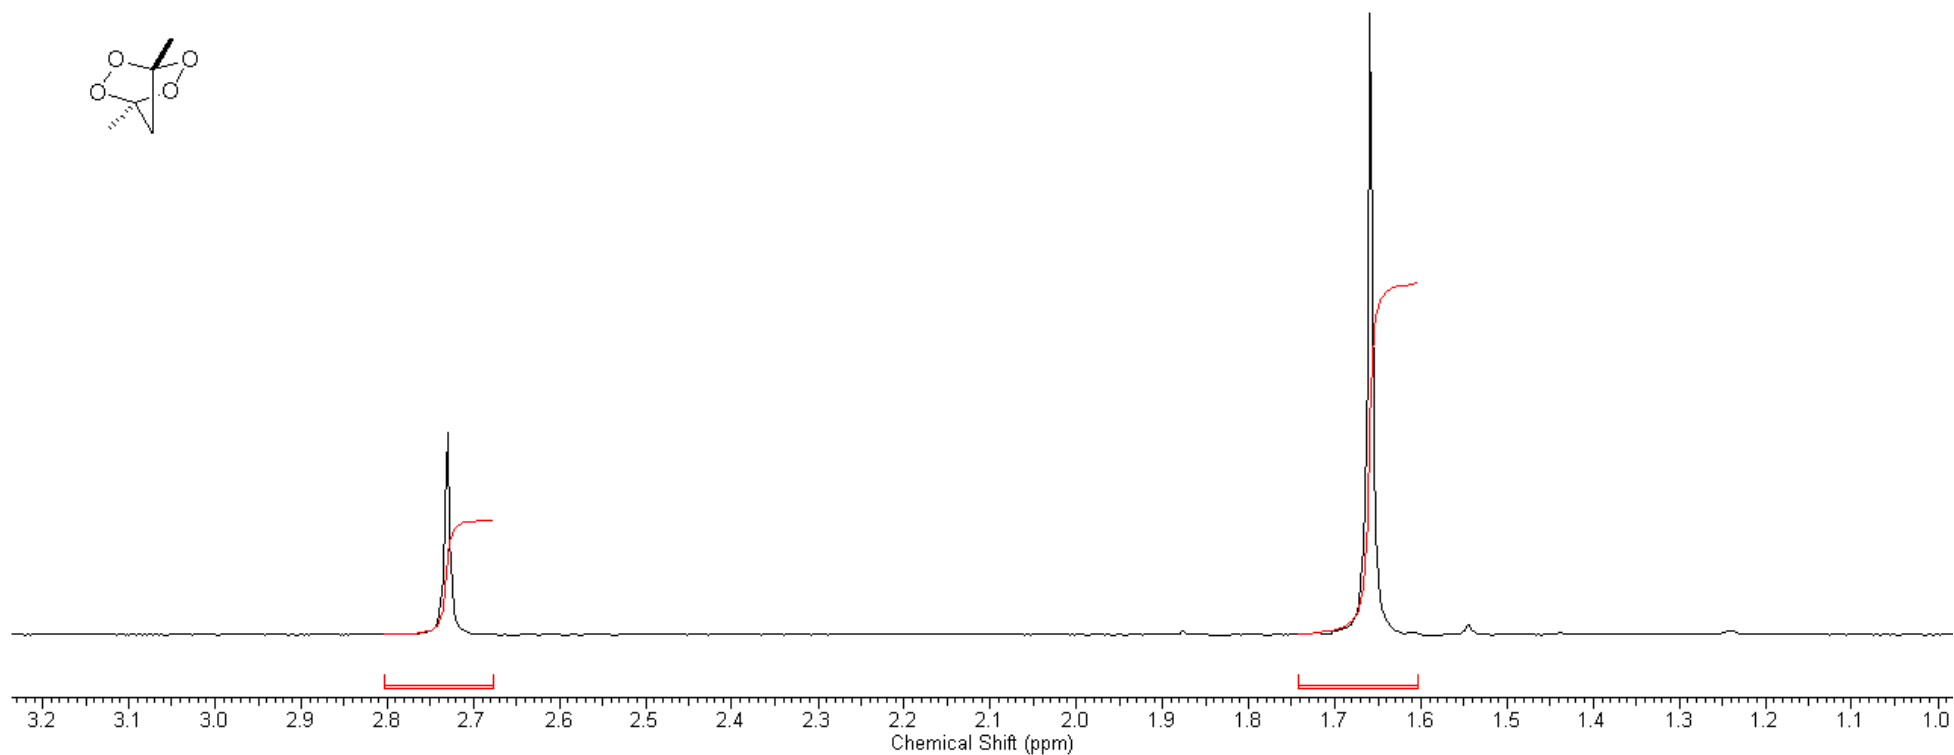

| No. | Annotation   | (ppm) |
|-----|--------------|-------|
| 1   | Chloroform-d | 7.25  |



### 1,4-Dimethyl-2,3,5,6-tetraoxabicyclo[2.2.1]heptane (2a)

|                               |            |                                        |              |                              |                      |
|-------------------------------|------------|----------------------------------------|--------------|------------------------------|----------------------|
| <b>Acquisition Time (sec)</b> | 0.4322     | <b>Comment</b> Avance-300, C-13, CDCl3 |              | <b>Date</b>                  | 06 Apr 2012 14:04:48 |
| <b>File Name</b>              |            |                                        |              | <b>Frequency (MHz)</b>       | 75.48                |
| <b>Nucleus</b>                | 13C        | <b>Number of Transients</b>            | 114          | <b>Original Points Count</b> | 16308                |
| <b>Pulse Sequence</b>         | zgpg60base | <b>Solvent</b>                         | CHLOROFORM-D | <b>Points Count</b>          | 16384                |
| <b>Temperature (degree C)</b> | 26.800     |                                        |              | <b>Sweep Width (Hz)</b>      | 18867.92             |

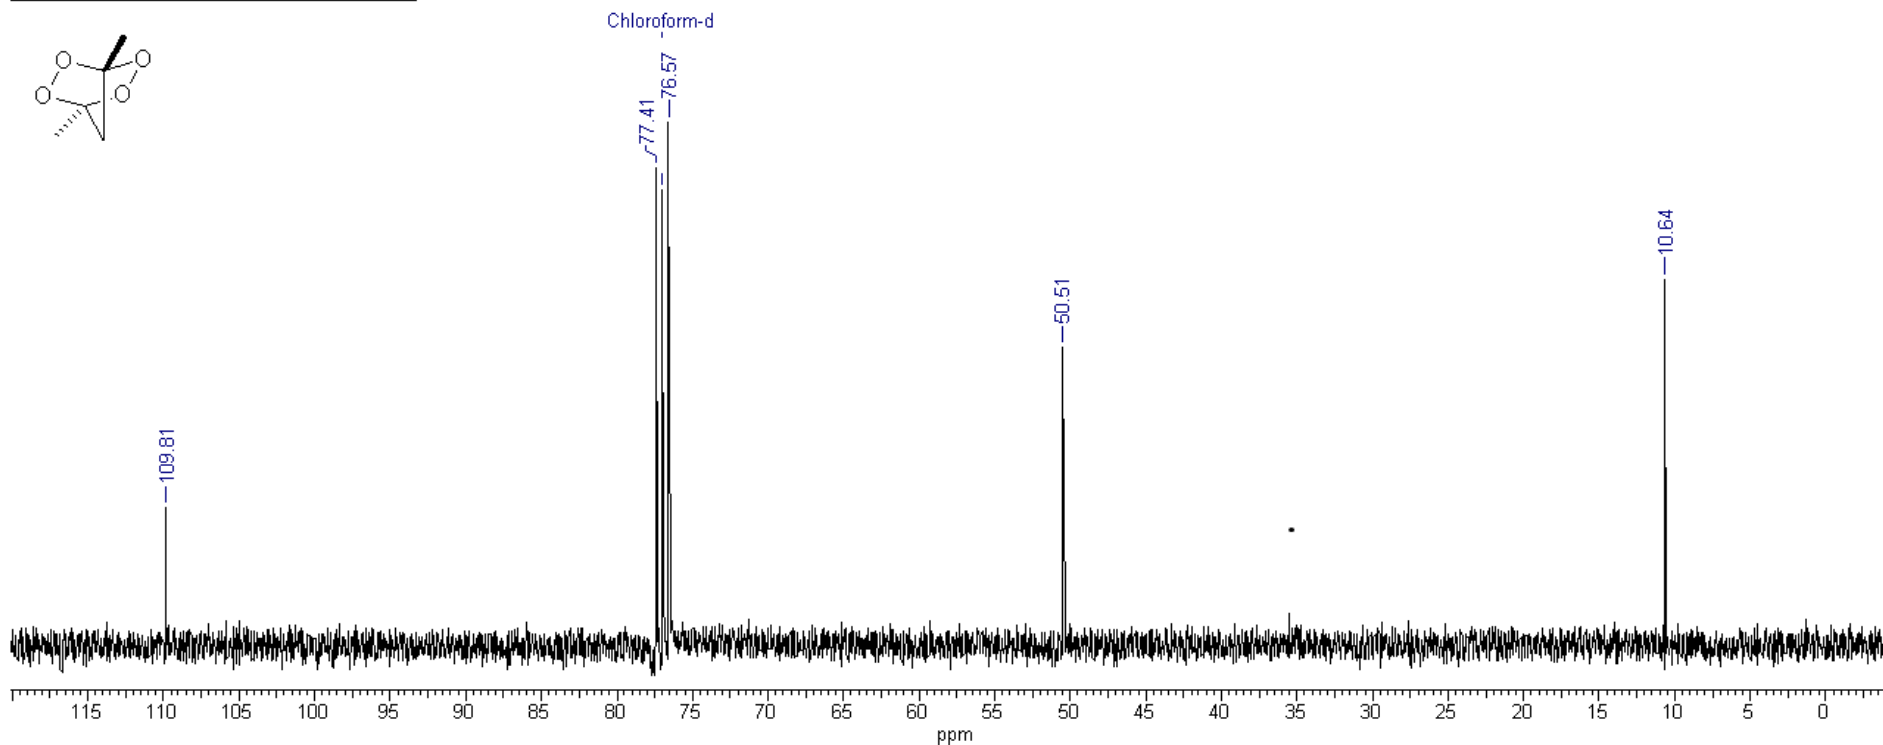

| No. | (ppm)  | (Hz)   | Height | No. | Annotation   | (ppm) |
|-----|--------|--------|--------|-----|--------------|-------|
| 1   | 10.64  | 803.0  | 0.6386 | 1   | Chloroform-d | 77.00 |
| 2   | 50.51  | 3812.3 | 0.5685 |     |              |       |
| 3   | 76.57  | 5779.4 | 1.0000 |     |              |       |
| 4   | 77.00  | 5811.6 | 0.8690 |     |              |       |
| 5   | 77.41  | 5842.7 | 0.9122 |     |              |       |
| 6   | 109.81 | 8287.7 | 0.2611 |     |              |       |

**1-Isobutyl-4-methyl-2,3,5,6-tetraoxabicyclo[2.2.1]heptane (2b)**

|                               |                |                                  |              |                                 |
|-------------------------------|----------------|----------------------------------|--------------|---------------------------------|
| <b>Acquisition Time (sec)</b> | 1.3518         | <b>Date</b> 19 Apr 2012 14:32:32 |              |                                 |
| <b>File Name</b>              |                |                                  |              | <b>Frequency (MHz)</b> 300.13   |
| <b>Nucleus</b>                | <sup>1</sup> H | <b>Number of Transients</b>      | 1            | <b>Points Count</b> 8192        |
| <b>Pulse Sequence</b>         | zg             | <b>Solvent</b>                   | CHLOROFORM-D | <b>Sweep Width (Hz)</b> 6009.62 |
| <b>Temperature (degree C)</b> | 26.800         |                                  |              |                                 |

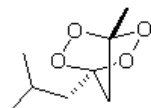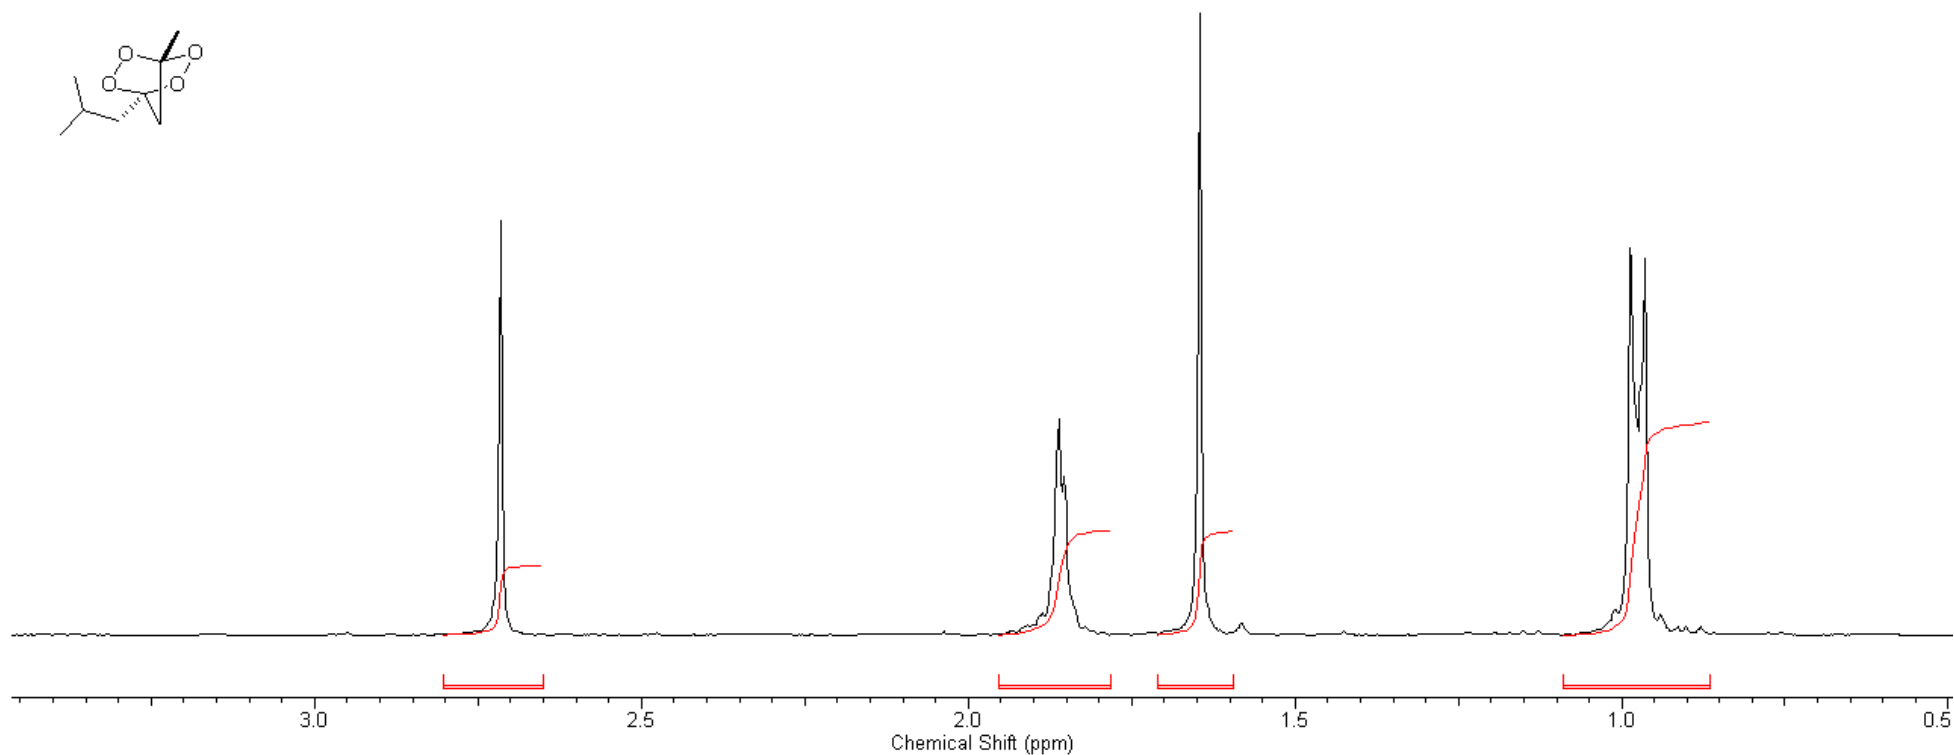

| No. | Annotation   | (ppm) |
|-----|--------------|-------|
| 1   | Chloroform-d | 7.25  |

### 1-Isobutyl-4-methyl-2,3,5,6-tetraoxabicyclo[2.2.1]heptane (2b)

|                        |            |                      |                        |                       |                  |                      |       |
|------------------------|------------|----------------------|------------------------|-----------------------|------------------|----------------------|-------|
| Acquisition Time (sec) | 0.4501     | Comment              | Avance-300, C-13, CDCB |                       | Date             | 19 Apr 2012 14:32:32 |       |
| File Name              |            |                      |                        |                       | Frequency (MHz)  | 75.48                |       |
| Nucleus                | 13C        | Number of Transients | 138                    | Original Points Count | 16308            | Points Count         | 16384 |
| Pulse Sequence         | zgpg30base | Solvent              | CHLOROFORM-D           |                       | Sweep Width (Hz) | 18115.94             |       |
| Temperature (degree C) | 26.900     |                      |                        |                       |                  |                      |       |

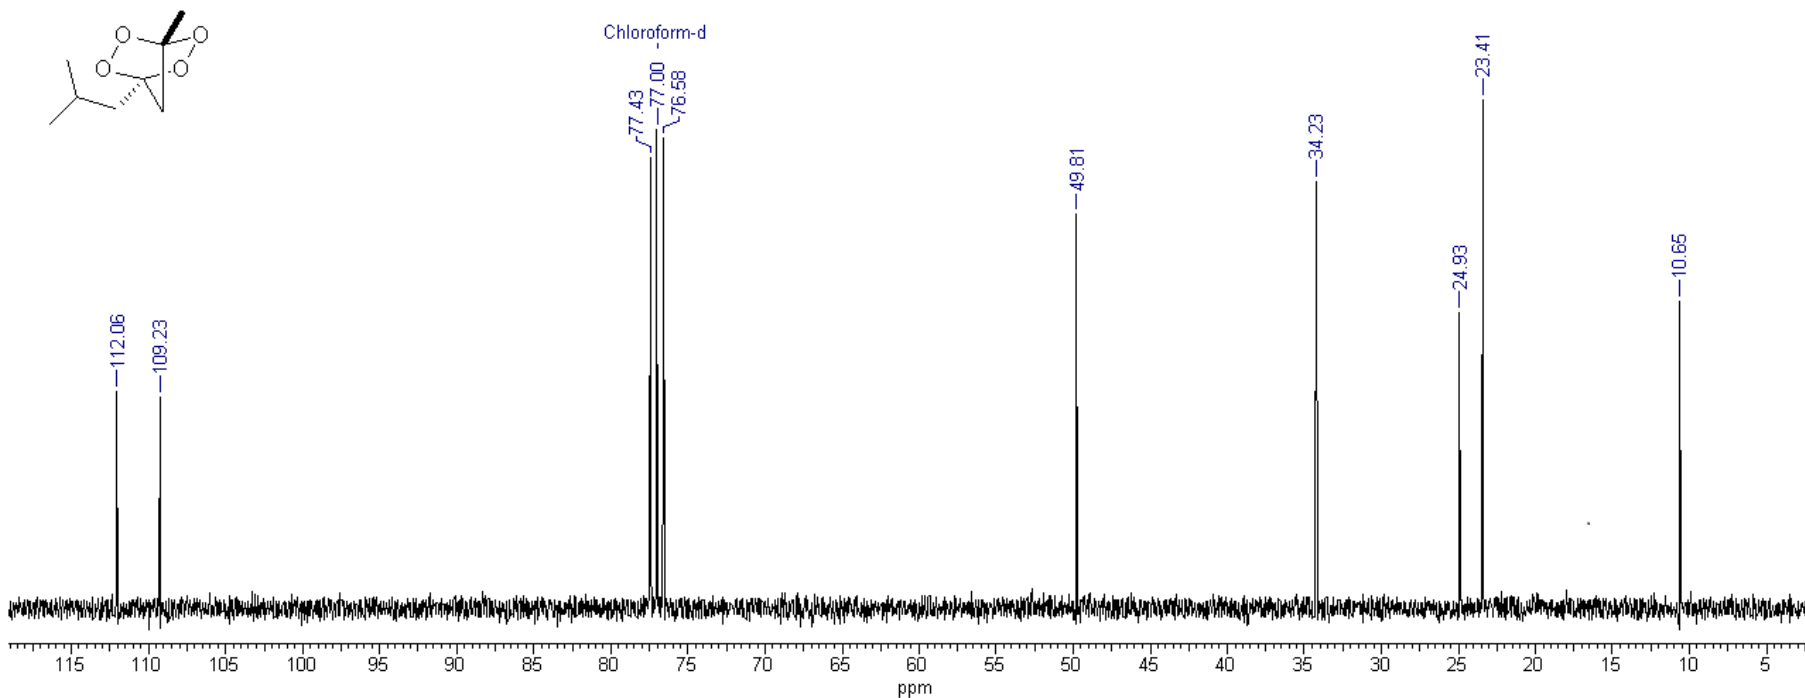

| No. | Annotation   | (ppm) |
|-----|--------------|-------|
| 1   | Chloroform-d | 77.00 |

**1-Ethyl-4-isobutyl-2,3,5,6-tetraoxabicyclo[2.2.1]heptane (2c)**

|                                      |  |                                   |                                 |                                      |                   |
|--------------------------------------|--|-----------------------------------|---------------------------------|--------------------------------------|-------------------|
| <b>Acquisition Time (sec)</b> 0.6759 |  | <b>Comment</b> NMR/50059953       |                                 | <b>Date</b> 19 Apr 2012 14:53:52     |                   |
| <b>File Name</b>                     |  |                                   |                                 | <b>Frequency (MHz)</b> 300.13        | <b>Nucleus</b> 1H |
| <b>Number of Transients</b> 1        |  | <b>Original Points Count</b> 8124 | <b>Points Count</b> 8192        | <b>Pulse Sequence</b> zg             |                   |
| <b>Solvent</b> CHLOROFORM-D          |  |                                   | <b>Sweep Width (Hz)</b> 6009.62 | <b>Temperature (degree C)</b> 27.200 |                   |

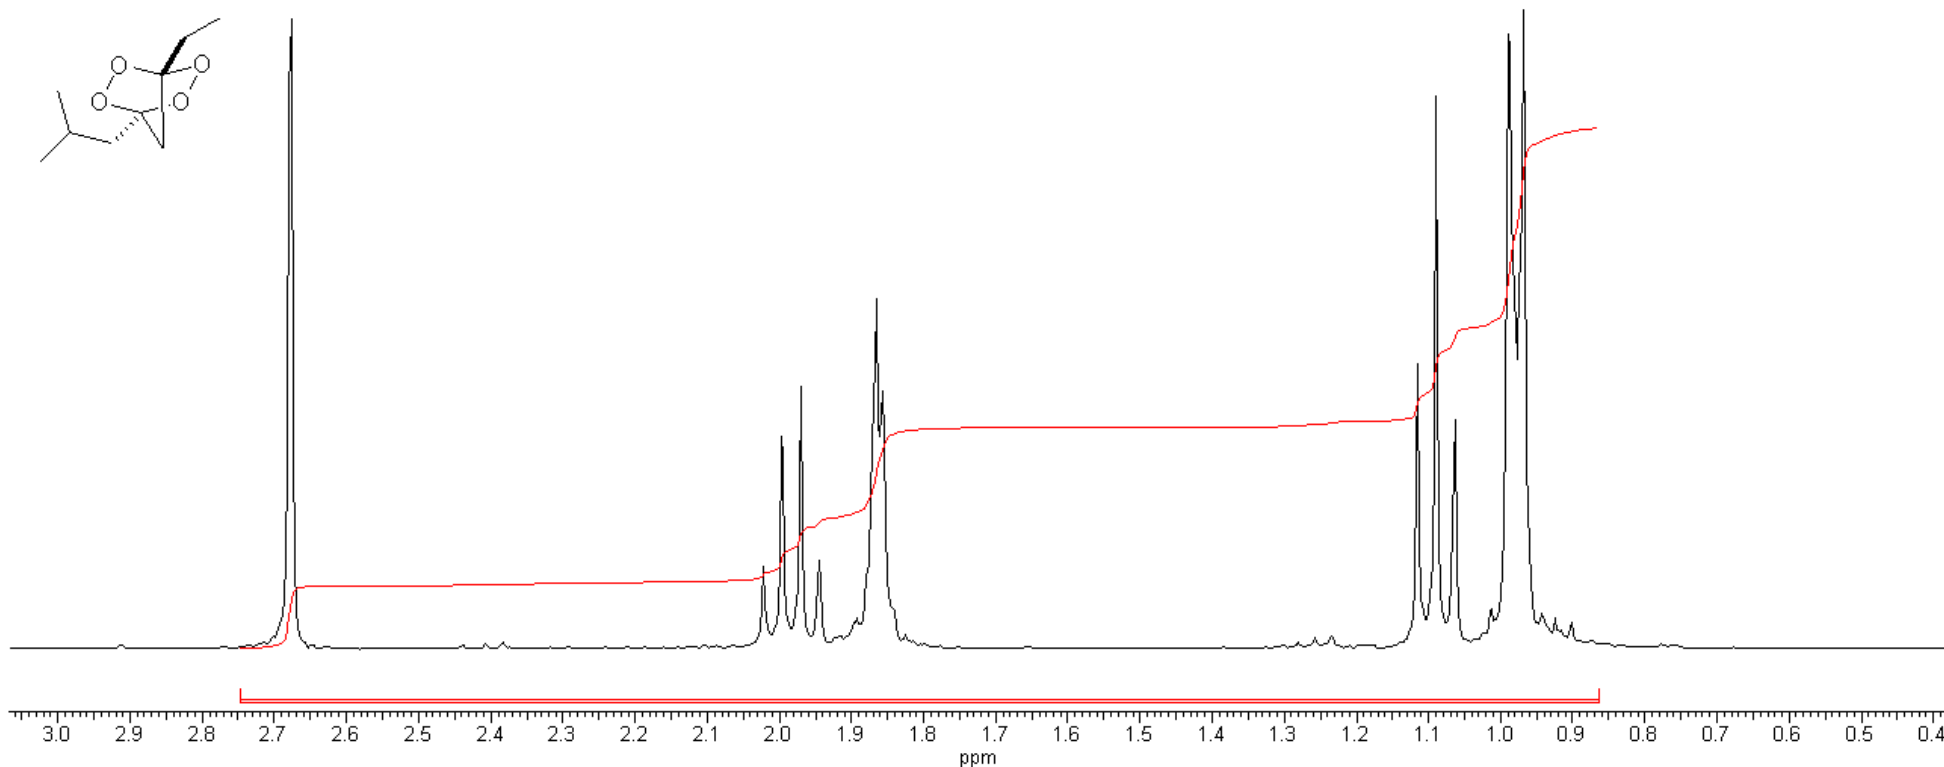

| No. | (ppm) | (Hz)   | Height | No. | Annotation   | (ppm) | No. | (ppm)       | Value   |
|-----|-------|--------|--------|-----|--------------|-------|-----|-------------|---------|
| 1   | 7.25  | 2176.1 | 0.0262 | 1   | Chloroform-d | 7.25  | 1   | 0.86 .. 2.7 | 150.000 |

### 1-Ethyl-4-isobutyl-2,3,5,6-tetraoxabicyclo[2.2.1]heptane (2c)

|                        |            |                      |                        |                       |       |                  |                      |
|------------------------|------------|----------------------|------------------------|-----------------------|-------|------------------|----------------------|
| Acquisition Time (sec) | 0.4501     | Comment              | Avance-300, C-13, CDCB |                       |       | Date             | 19 Apr 2012 14:56:00 |
| File Name              |            |                      |                        |                       |       | Frequency (MHz)  | 75.48                |
| Nucleus                | 13C        | Number of Transients | 201                    | Original Points Count | 16308 | Points Count     | 16384                |
| Pulse Sequence         | zgpg30base | Solvent              | CHLOROFORM-D           |                       |       | Sweep Width (Hz) | 18115.94             |
| Temperature (degree C) | 27.100     |                      |                        |                       |       |                  |                      |

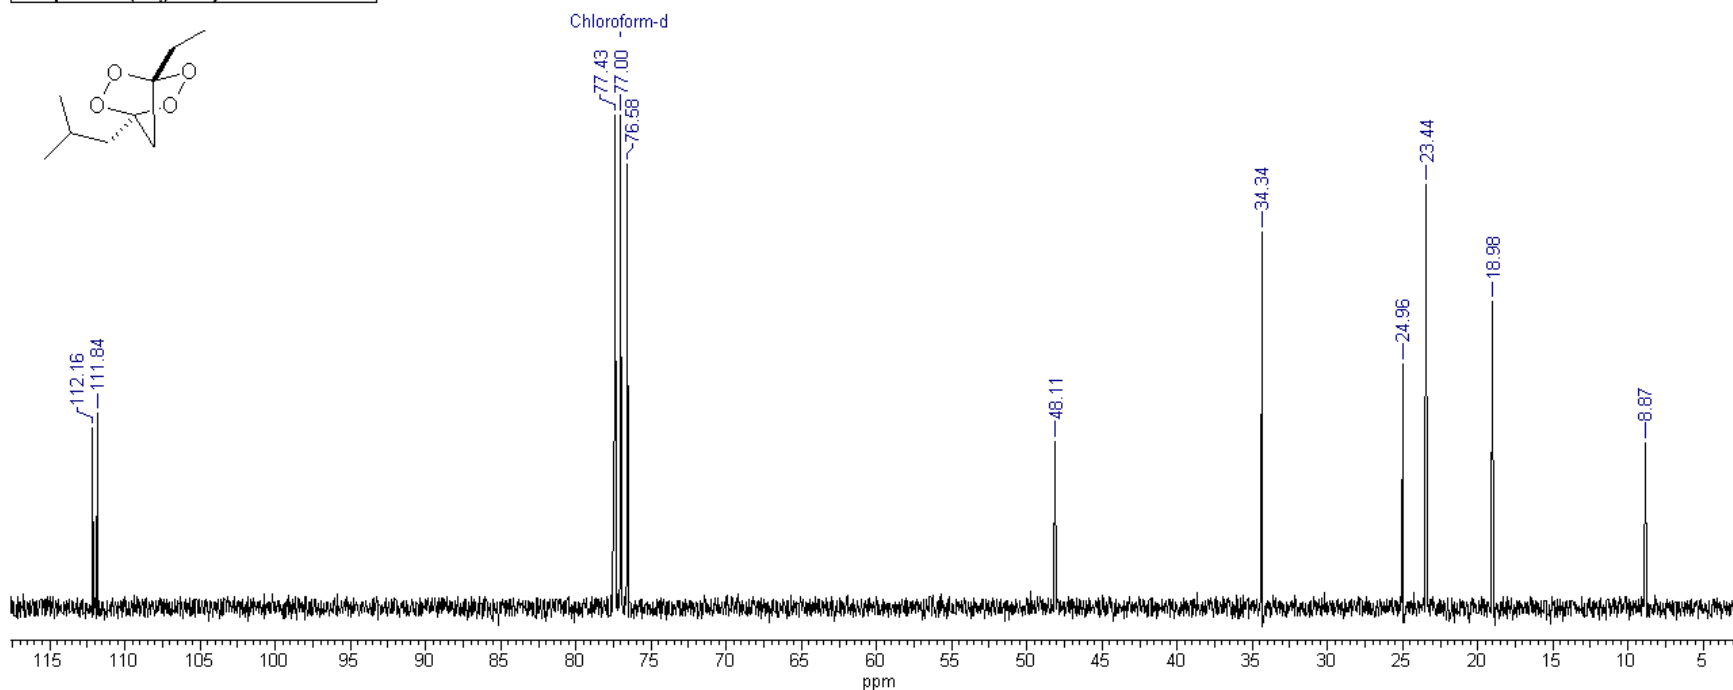

| No. | (ppm)  | (Hz)   | Height |
|-----|--------|--------|--------|
| 1   | 8.87   | 669.8  | 0.3348 |
| 2   | 18.98  | 1432.8 | 0.6199 |
| 3   | 23.44  | 1769.0 | 0.8576 |
| 4   | 24.96  | 1884.0 | 0.4939 |
| 5   | 34.34  | 2591.7 | 0.7627 |
| 6   | 48.11  | 3631.1 | 0.3371 |
| 7   | 76.58  | 5779.6 | 0.8994 |
| 8   | 77.00  | 5811.7 | 1.0000 |
| 9   | 77.43  | 5843.8 | 0.9991 |
| 10  | 111.84 | 8441.2 | 0.3935 |
| 11  | 112.16 | 8465.5 | 0.3653 |

| No. | Annotation   | (ppm) |
|-----|--------------|-------|
| 1   | Chloroform-d | 77.00 |

# 1,4-Di-*tert*-butyl-2,3,5,6-tetraoxabicyclo[2.2.1]heptane (2d)

|                                      |  |                                   |                                 |                                      |                   |
|--------------------------------------|--|-----------------------------------|---------------------------------|--------------------------------------|-------------------|
| <b>Acquisition Time (sec)</b> 0.6759 |  | <b>Comment</b> NMR/50059953       |                                 | <b>Date</b> 18 Jun 2012 10:42:08     |                   |
| <b>File Name</b>                     |  |                                   |                                 | <b>Frequency (MHz)</b> 300.13        | <b>Nucleus</b> 1H |
| <b>Number of Transients</b> 1        |  | <b>Original Points Count</b> 8124 | <b>Points Count</b> 8192        | <b>Pulse Sequence</b> zg             |                   |
| <b>Solvent</b> CHLOROFORM-D          |  |                                   | <b>Sweep Width (Hz)</b> 6009.62 | <b>Temperature (degree C)</b> 26.300 |                   |

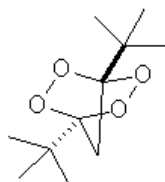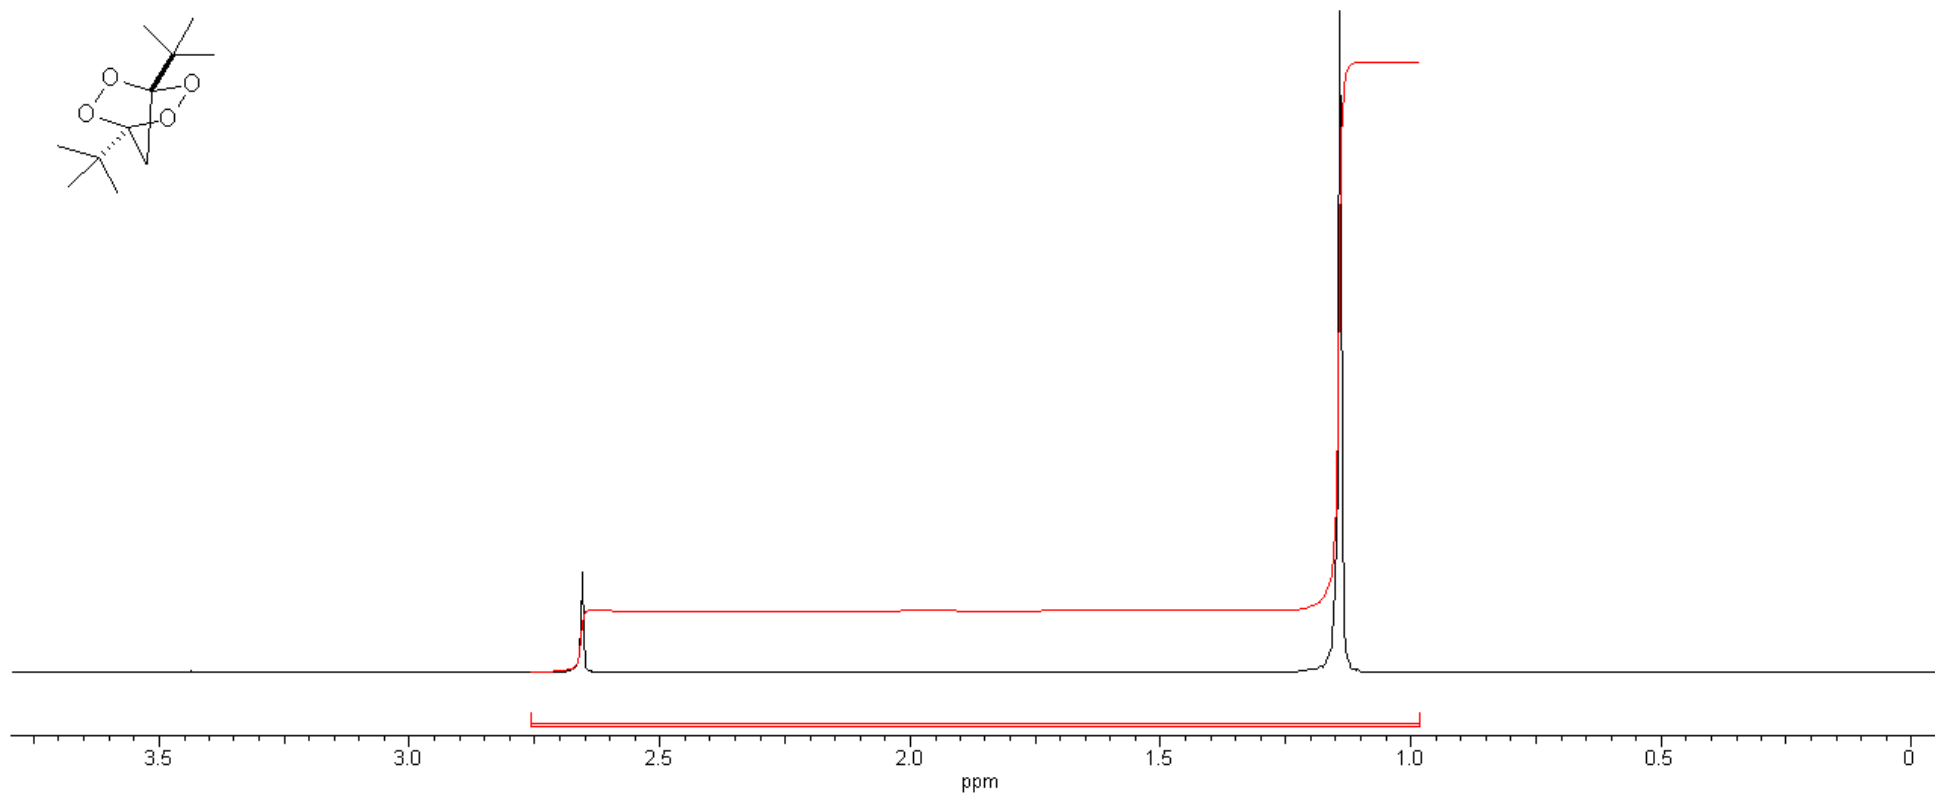

| No. | (ppm) | (Hz)   | Height | No. | Annotation   | (ppm) | No. | (ppm)      | Value  |
|-----|-------|--------|--------|-----|--------------|-------|-----|------------|--------|
| 1   | 7.25  | 2176.1 | 0.0097 | 1   | Chloroform-d | 7.25  | 1   | .98 .. 2.7 | 50.000 |

### 1,4-Di-*tert*-butyl-2,3,5,6-tetraoxabicyclo[2.2.1]heptane (2d)

|                        |            |                      |                        |                       |                  |                      |       |
|------------------------|------------|----------------------|------------------------|-----------------------|------------------|----------------------|-------|
| Acquisition Time (sec) | 0.4501     | Comment              | Avance-300, C-13, CDCB |                       | Date             | 18 Jun 2012 10:44:16 |       |
| File Name              |            |                      |                        |                       | Frequency (MHz)  | 75.48                |       |
| Nucleus                | 13C        | Number of Transients | 139                    | Original Points Count | 16308            | Points Count         | 16384 |
| Pulse Sequence         | zgpg30base | Solvent              | CHLOROFORM-D           |                       | Sweep Width (Hz) | 18115.94             |       |
| Temperature (degree C) | 26.400     |                      |                        |                       |                  |                      |       |

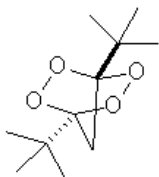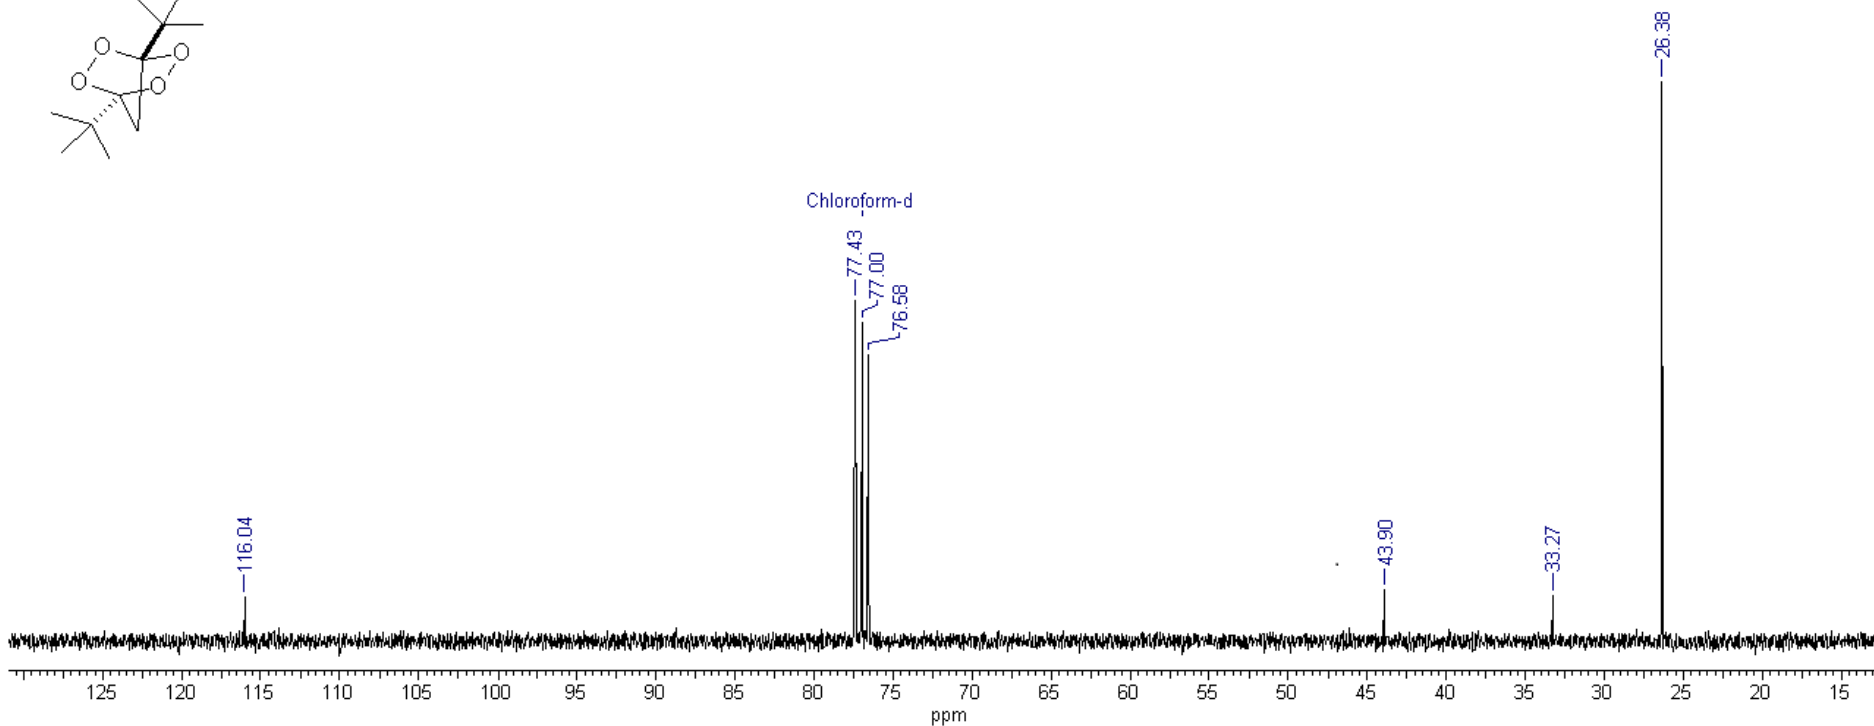

| No. | (ppm)  | (Hz)   | Height |
|-----|--------|--------|--------|
| 1   | 26.38  | 1991.2 | 1.0000 |
| 2   | 33.27  | 2510.9 | 0.0813 |
| 3   | 43.90  | 3313.7 | 0.0905 |
| 4   | 76.58  | 5779.6 | 0.5130 |
| 5   | 77.00  | 5811.7 | 0.5690 |
| 6   | 77.43  | 5843.8 | 0.6084 |
| 7   | 116.04 | 8758.6 | 0.0790 |

| No. | Annotation   | (ppm) |
|-----|--------------|-------|
| 1   | Chloroform-d | 77.00 |

**1-(1-Adamantyl)-4-methyl-2,3,5,6-tetraoxabicyclo[2.2.1]heptane (2e)**

|                               |        |                             |              |                              |                                 |
|-------------------------------|--------|-----------------------------|--------------|------------------------------|---------------------------------|
| <b>Acquisition Time (sec)</b> | 0.6759 | <b>Comment</b>              | /LB58 ZSS130 | <b>Date</b>                  | 07 Dec 2011 14:38:56            |
| <b>File Name</b>              |        |                             |              | <b>Frequency (MHz)</b>       | 300.13                          |
| <b>Nucleus</b>                | 1H     | <b>Number of Transients</b> | 1            | <b>Original Points Count</b> | 8124                            |
| <b>Pulse Sequence</b>         | zg     | <b>Solvent</b>              | CHLOROFORM-D | <b>Points Count</b>          | 8192                            |
| <b>Temperature (degree C)</b> | 26.900 |                             |              |                              | <b>Sweep Width (Hz)</b> 6009.62 |

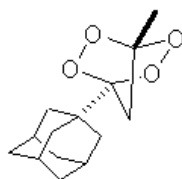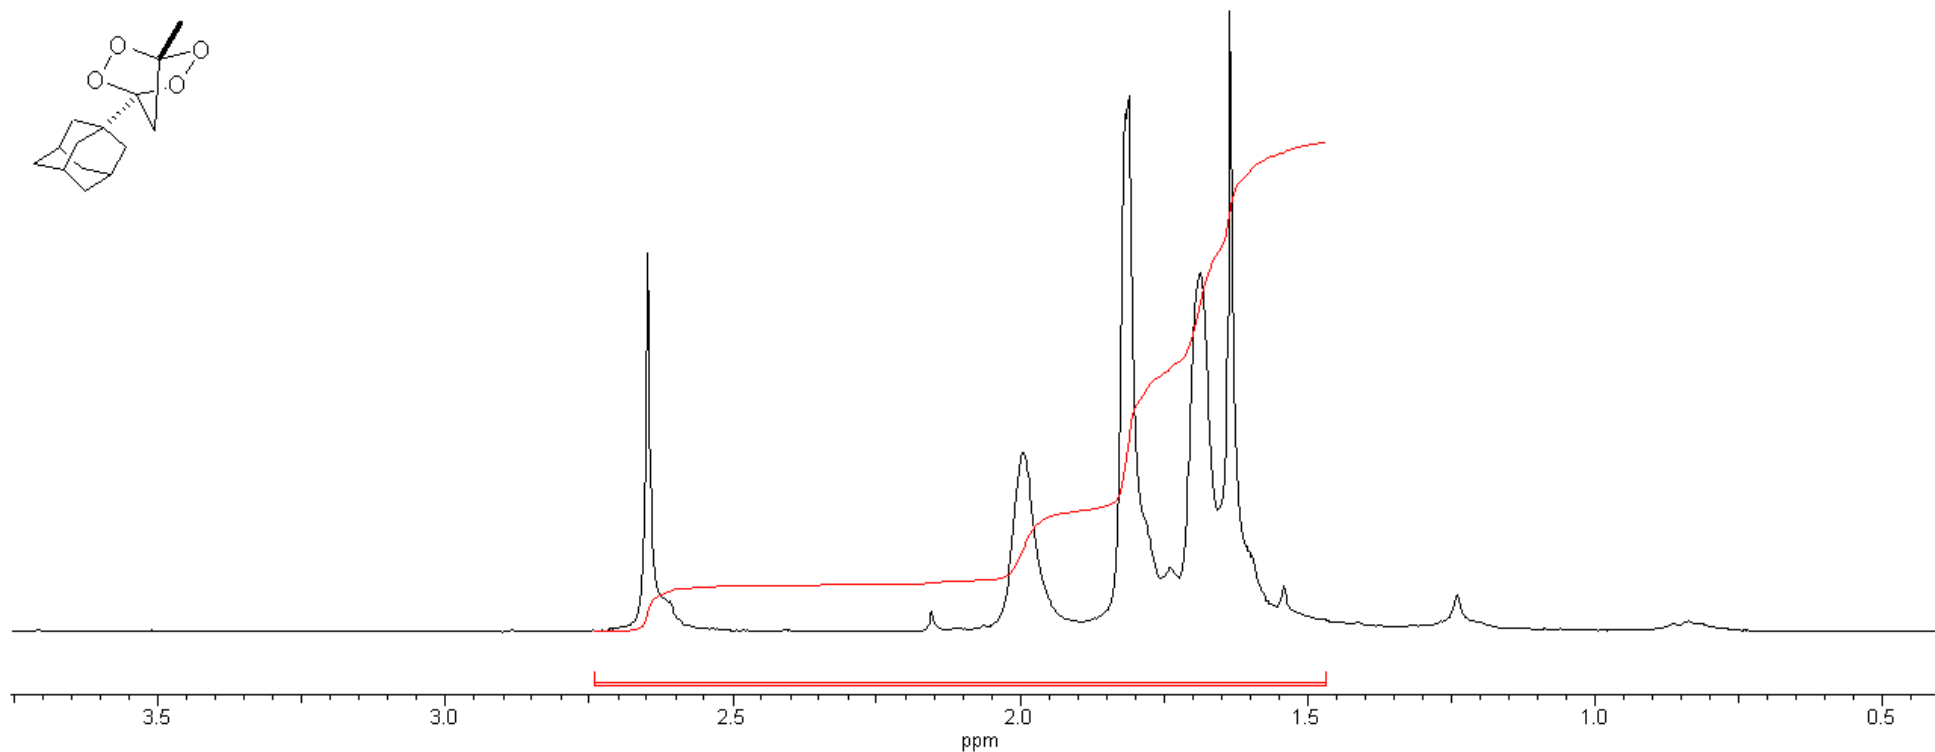

| No. | (ppm) | (Hz)   | Height | No. | Annotation   | (ppm) | No. | (ppm)      | Value  |
|-----|-------|--------|--------|-----|--------------|-------|-----|------------|--------|
| 1   | 7.25  | 2176.0 | 0.0547 | 1   | Chloroform-d | 7.25  | 1   | .47 .. 2.7 | 11.317 |



### 1-(1-Adamantyl)-4-methyl-2,3,5,6-tetraoxabicyclo[2.2.1]heptane (2e)

|                        |            |                      |                        |                       |                  |                      |       |
|------------------------|------------|----------------------|------------------------|-----------------------|------------------|----------------------|-------|
| Acquisition Time (sec) | 0.4501     | Comment              | Avance-300, C-13, CDCB |                       | Date             | 07 Dec 2011 14:41:04 |       |
| File Name              |            |                      |                        |                       | Frequency (MHz)  | 75.48                |       |
| Nucleus                | 13C        | Number of Transients | 1154                   | Original Points Count | 16308            | Points Count         | 16384 |
| Pulse Sequence         | zgpg30base | Solvent              | CHLOROFORM-D           |                       | Sweep Width (Hz) | 18115.94             |       |
| Temperature (degree C) | 26.900     |                      |                        |                       |                  |                      |       |

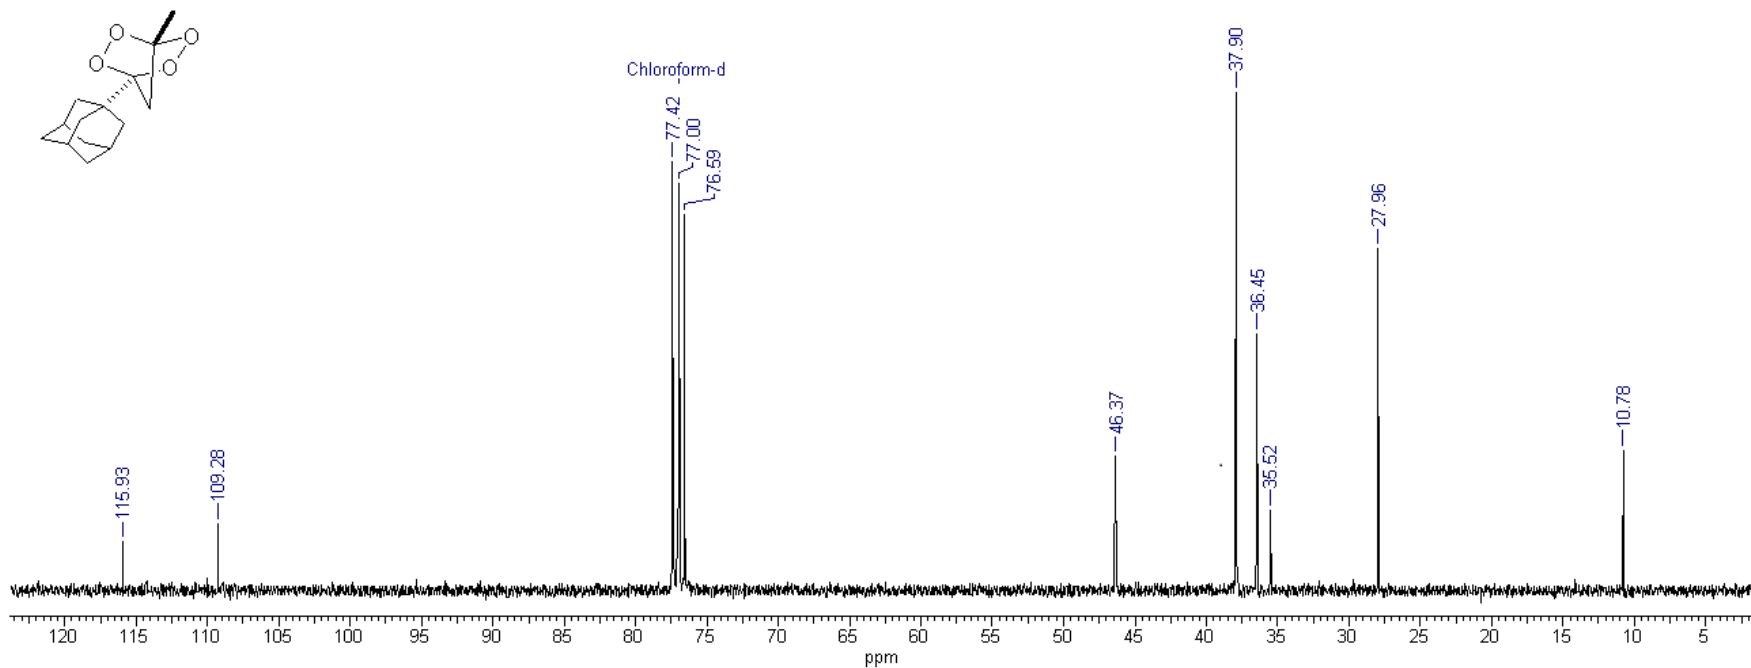

| No. | Annotation   | (ppm) |
|-----|--------------|-------|
| 1   | Chloroform-d | 77.00 |

1-(1-Adamantyl)-4-ethyl-2,3,5,6-tetraoxabicyclo[2.2.1]heptane (2f)

|                               |                |                             |              |                              |                      |
|-------------------------------|----------------|-----------------------------|--------------|------------------------------|----------------------|
| <b>Acquisition Time (sec)</b> | 0.6759         | <b>Comment</b>              | NMR.50059953 | <b>Date</b>                  | 18 Jan 2012 15:13:04 |
| <b>File Name</b>              |                |                             |              | <b>Frequency (MHz)</b>       | 300.13               |
| <b>Nucleus</b>                | <sup>1</sup> H | <b>Number of Transients</b> | 1            | <b>Original Points Count</b> | 8124                 |
| <b>Pulse Sequence</b>         | zg             | <b>Solvent</b>              | CHLOROFORM-D | <b>Points Count</b>          | 8192                 |
| <b>Temperature (degree C)</b> | 27.000         |                             |              | <b>Sweep Width (Hz)</b>      | 6009.62              |

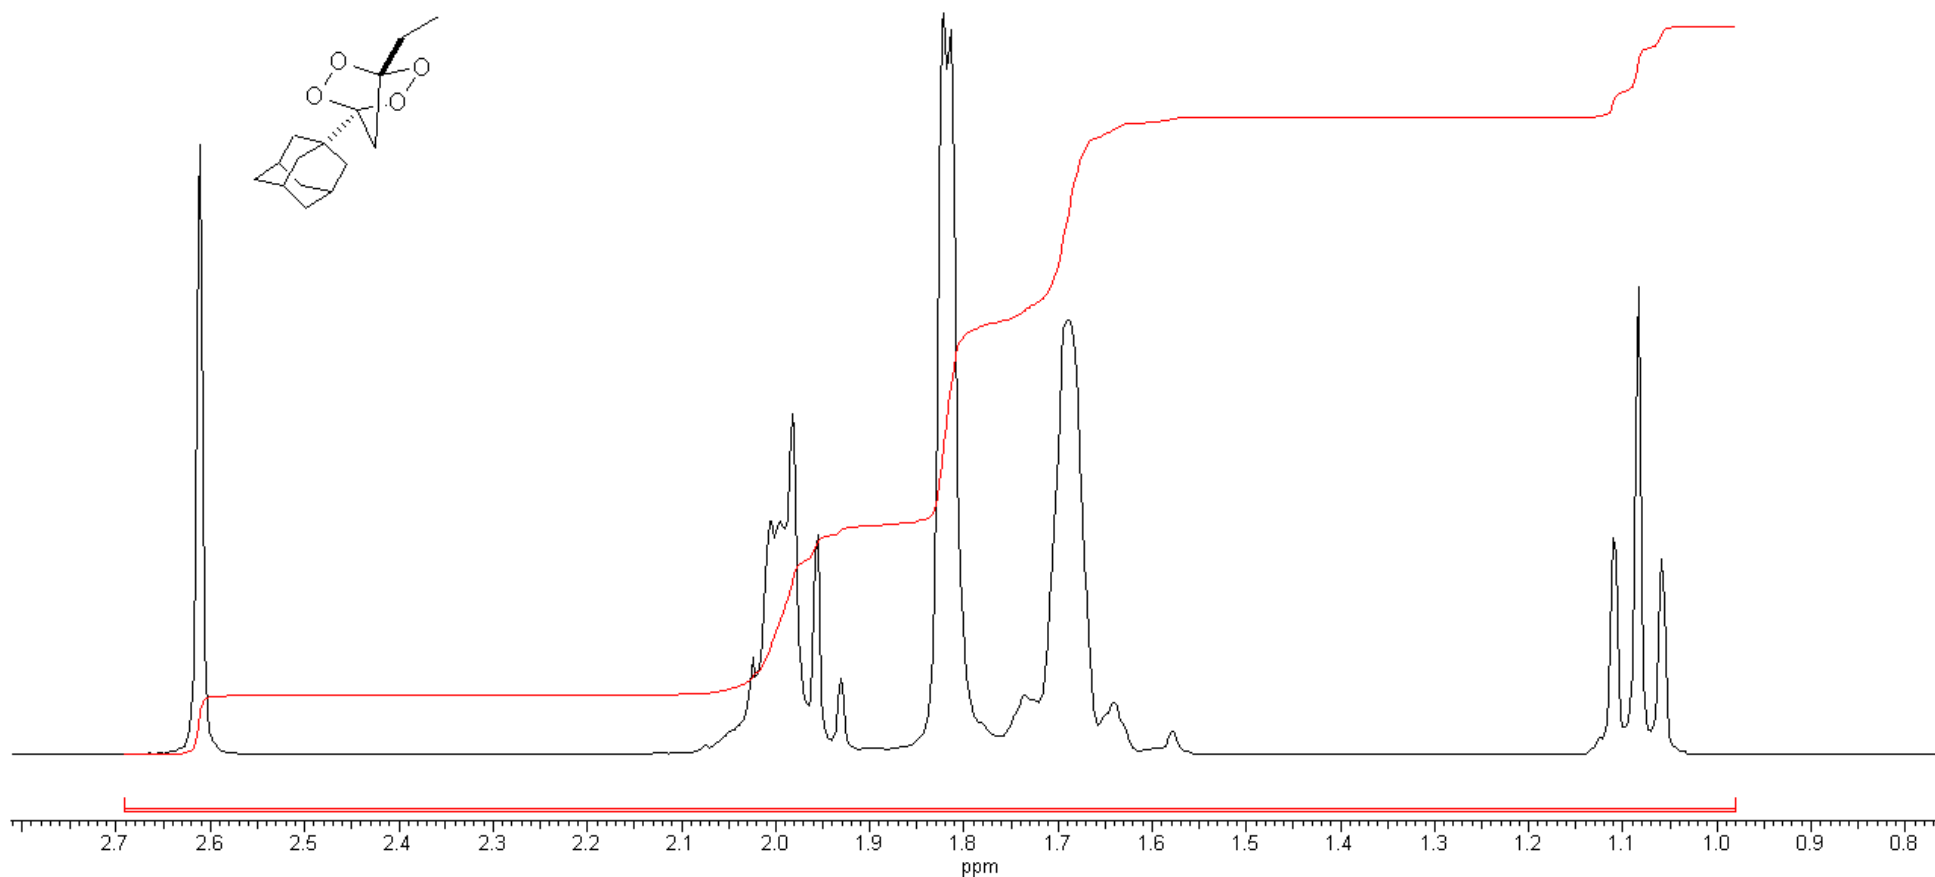

| No. | (ppm)        | Value   |
|-----|--------------|---------|
| 1   | 2.65 .. 2.67 | 150.000 |

# 1-(1-Adamantyl)-4-ethyl-2,3,5,6-tetraoxabicyclo[2.2.1]heptane (2f)

|                               |            |                             |                         |                              |                      |
|-------------------------------|------------|-----------------------------|-------------------------|------------------------------|----------------------|
| <b>Acquisition Time (sec)</b> | 0.4501     | <b>Comment</b>              | Avance-300, C-13, CDCl3 | <b>Date</b>                  | 18 Jan 2012 15:15:12 |
| <b>File Name</b>              |            |                             |                         | <b>Frequency (MHz)</b>       | 75.48                |
| <b>Nucleus</b>                | 13C        | <b>Number of Transients</b> | 231                     | <b>Original Points Count</b> | 16308                |
| <b>Pulse Sequence</b>         | zgpg30base | <b>Solvent</b>              | CHLOROFORM-D            | <b>Points Count</b>          | 16384                |
| <b>Temperature (degree C)</b> | 26.200     |                             |                         | <b>Sweep Width (Hz)</b>      | 18115.94             |

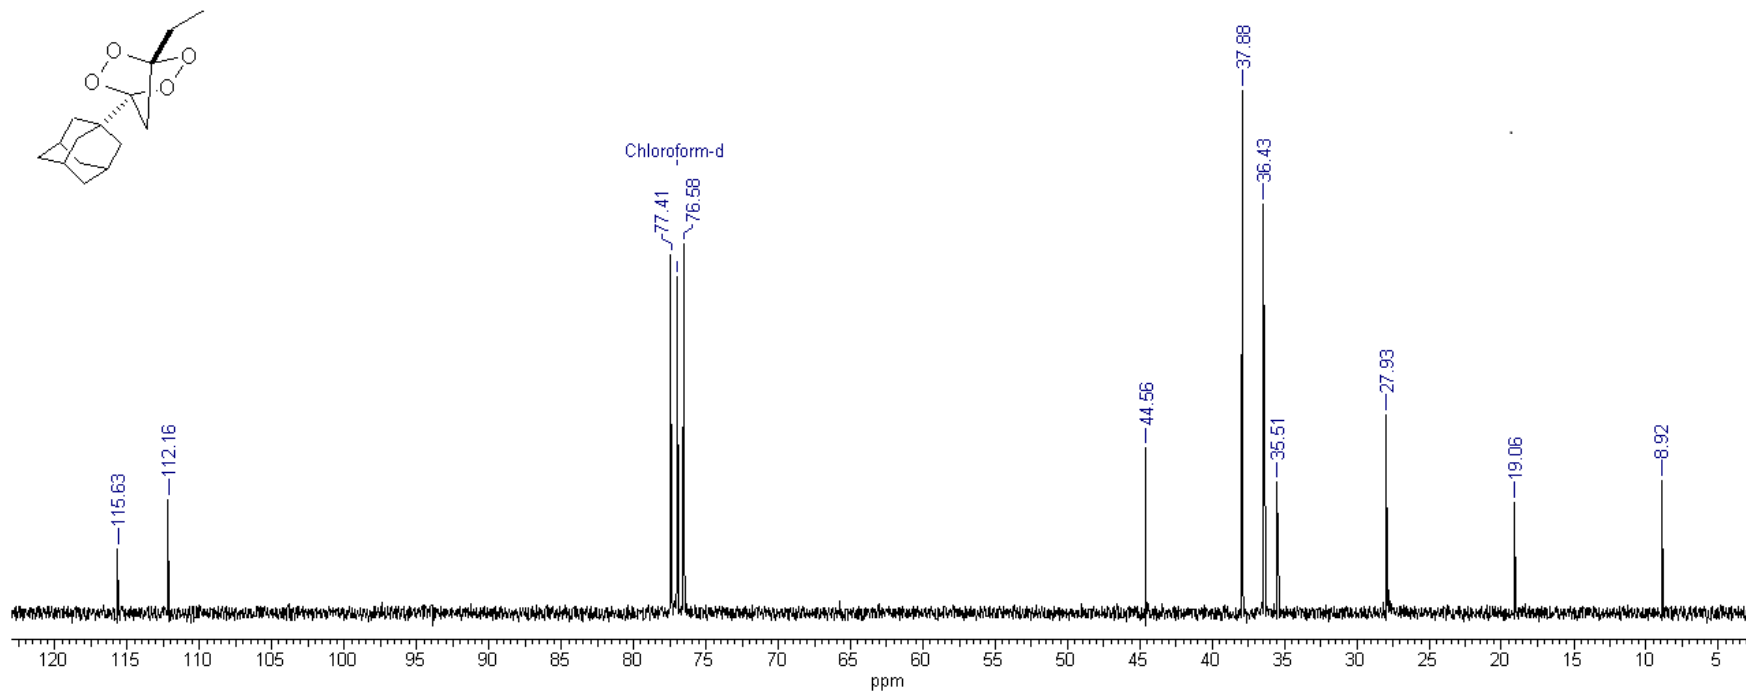

| No. | (ppm)  | (Hz)   | Height |
|-----|--------|--------|--------|
| 1   | 8.92   | 673.1  | 0.2548 |
| 2   | 19.06  | 1438.3 | 0.2121 |
| 3   | 27.93  | 2108.4 | 0.3807 |
| 4   | 35.51  | 2680.1 | 0.2502 |
| 5   | 36.43  | 2749.8 | 0.7835 |
| 6   | 37.88  | 2859.2 | 1.0000 |
| 7   | 44.56  | 3363.5 | 0.3150 |
| 8   | 76.58  | 5779.6 | 0.7055 |
| 9   | 77.00  | 5811.7 | 0.6429 |
| 10  | 77.41  | 5842.6 | 0.6864 |
| 11  | 112.16 | 8465.5 | 0.2182 |
| 12  | 115.63 | 8727.6 | 0.1220 |

| No. | Annotation   | (ppm) |
|-----|--------------|-------|
| 1   | Chloroform-d | 77.00 |

# 1,4-Dimethyl-7-hexyl-2,3,5,6-tetraoxabicyclo[2.2.1]heptane (2g)

|                               |  |                            |                          |                               |            |
|-------------------------------|--|----------------------------|--------------------------|-------------------------------|------------|
| Acquisition Time (sec) 0.6759 |  | Comment NMR/50059953       |                          | Date 28 May 2012 12:56:32     |            |
| File Name                     |  |                            |                          | Frequency (MHz) 300.13        | Nucleus 1H |
| Number of Transients 1        |  | Original Points Count 8124 | Points Count 8192        | Pulse Sequence zg             |            |
| Solvent CHLOROFORM-D          |  |                            | Sweep Width (Hz) 6009.62 | Temperature (degree C) 26.200 |            |

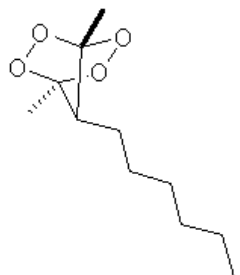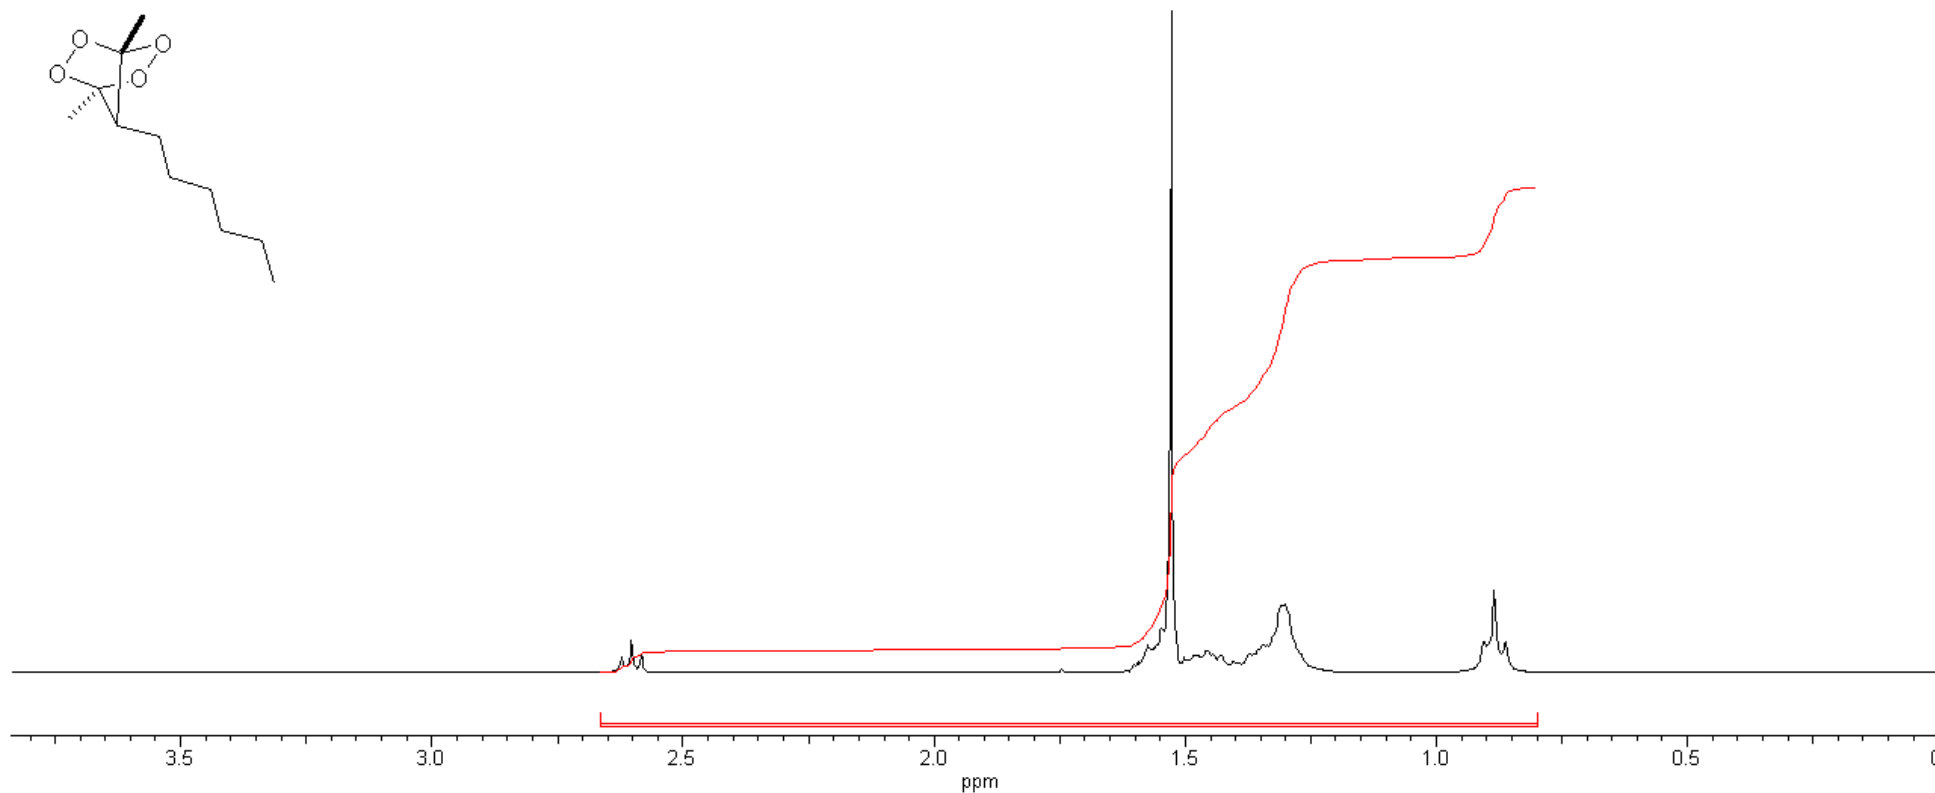

| No. | (ppm) | (Hz)   | Height | No. | Annotation   | (ppm) | No. | (ppm)      | Value   |
|-----|-------|--------|--------|-----|--------------|-------|-----|------------|---------|
| 1   | 7.25  | 2176.1 | 0.0064 | 1   | Chloroform-d | 7.25  | 1   | .80 .. 2.6 | 150.000 |

### 1,4-Dimethyl-7-hexyl-2,3,5,6-tetraoxabicyclo[2.2.1]heptane (2g)

|                        |            |                      |                         |                       |                      |
|------------------------|------------|----------------------|-------------------------|-----------------------|----------------------|
| Acquisition Time (sec) | 0.4501     | Comment              | Avance-300, C-13, CDC13 | Date                  | 28 May 2012 12:58:40 |
| File Name              |            |                      |                         | Frequency (MHz)       | 75.48                |
| Nucleus                | 13C        | Number of Transients | 157                     | Original Points Count | 16308                |
| Pulse Sequence         | zgpg30base | Solvent              | CHLOROFORM-D            | Points Count          | 16384                |
| Temperature (degree C) | 26.300     |                      |                         | Sweep Width (Hz)      | 18115.94             |

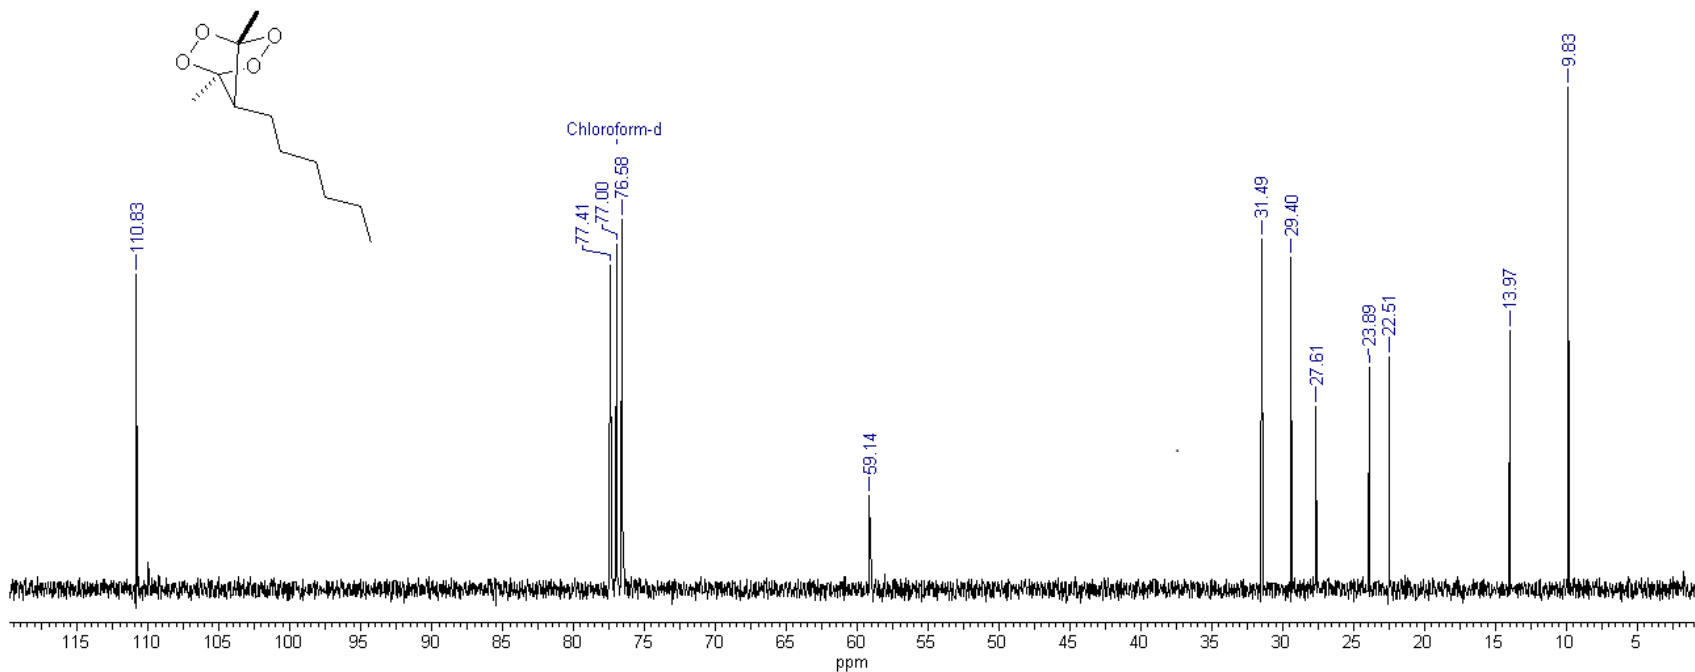

| No. | Annotation   | (ppm) |
|-----|--------------|-------|
| 1   | Chloroform-d | 77.00 |

### 7-Allyl-1,4-dimethyl-2,3,5,6-tetraoxabicyclo[2.2.1]heptane (2h)

|                               |              |                              |              |                               |                      |
|-------------------------------|--------------|------------------------------|--------------|-------------------------------|----------------------|
| <b>Acquisition Time (sec)</b> | 0.6759       | <b>Comment</b>               | NMR/50059953 | <b>Date</b>                   | 06 Feb 2012 10:18:40 |
| <b>File Name</b>              |              |                              |              | <b>Frequency (MHz)</b>        | 300.13               |
| <b>Number of Transients</b>   | 1            | <b>Original Points Count</b> | 8124         | <b>Points Count</b>           | 8192                 |
| <b>Solvent</b>                | CHLOROFORM-D | <b>Sweep Width (Hz)</b>      | 6009.62      | <b>Pulse Sequence</b>         | zg                   |
|                               |              |                              |              | <b>Temperature (degree C)</b> | 23.800               |
|                               |              |                              |              | <b>Nucleus</b>                | <sup>1</sup> H       |

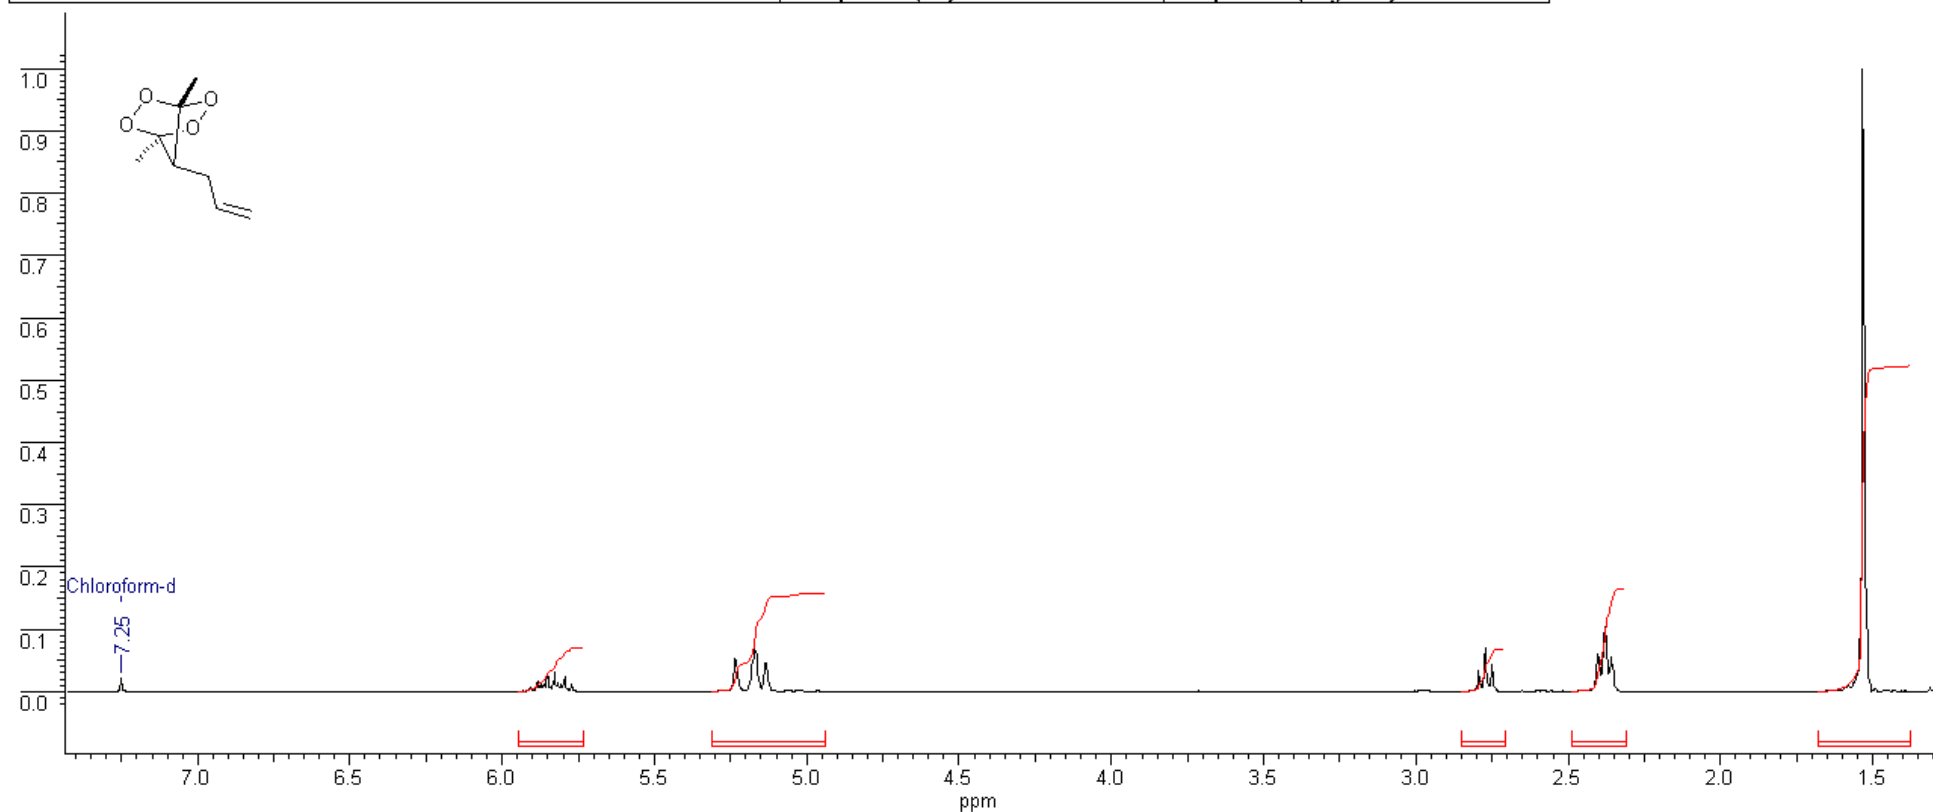

| No. | Annotation   | (ppm) |
|-----|--------------|-------|
| 1   | Chloroform-d | 7.25  |

**7-(1-Adamanty)-1,4-dimethyl-2,3,5,6-tetraoxabicyclo[2.2.1]heptane (2i)**

|                                      |  |                                   |                                 |                                      |                   |
|--------------------------------------|--|-----------------------------------|---------------------------------|--------------------------------------|-------------------|
| <b>Acquisition Time (sec)</b> 0.6759 |  | <b>Comment</b> NMR/50059953       |                                 | <b>Date</b> 05 Mar 2012 10:27:12     |                   |
| <b>File Name</b>                     |  |                                   |                                 | <b>Frequency (MHz)</b> 300.13        | <b>Nucleus</b> 1H |
| <b>Number of Transients</b> 1        |  | <b>Original Points Count</b> 8124 | <b>Points Count</b> 8192        | <b>Pulse Sequence</b> zg             |                   |
| <b>Solvent</b> CHLOROFORM-D          |  |                                   | <b>Sweep Width (Hz)</b> 6009.62 | <b>Temperature (degree C)</b> 27.000 |                   |

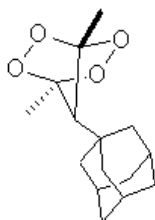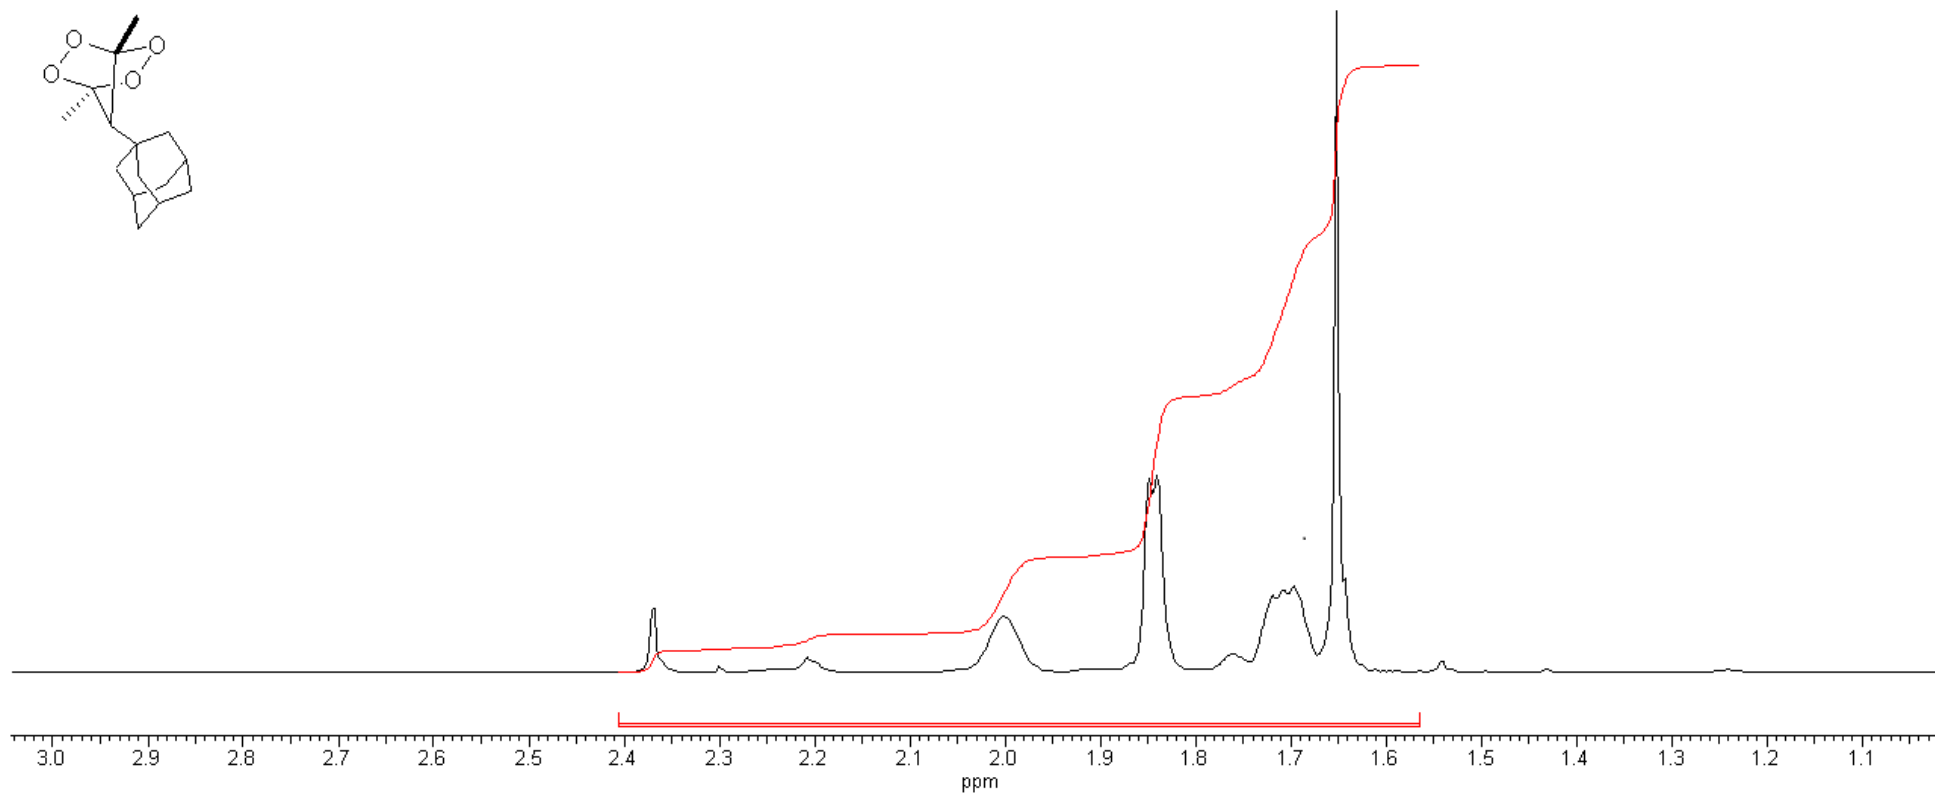

| No. | (ppm) | (Hz)   | Height | No. | Annotation   | (ppm) | No. | (ppm)      | Value   |
|-----|-------|--------|--------|-----|--------------|-------|-----|------------|---------|
| 1   | 7.25  | 2176.1 | 0.0183 | 1   | Chloroform-d | 7.25  | 1   | .56 .. 2.4 | 150.000 |

**7-(1-Adamantyl)-1-isobutyl-4-methyl-2,3,5,6-tetraoxabicyclo[2.2.1]heptane (2j)**

|                        |              |                       |              |                  |                 |                        |               |        |
|------------------------|--------------|-----------------------|--------------|------------------|-----------------|------------------------|---------------|--------|
| Acquisition Time (sec) | 0.6759       | Comment               | NMR/50059953 |                  | Date            | 14 May 2012 11:01:20   |               |        |
| File Name              |              |                       |              |                  | Frequency (MHz) | 300.13                 | Nucleus<br>1H |        |
| Number of Transients   | 1            | Original Points Count | 8124         | Points Count     | 8192            | Pulse Sequence         |               | zg     |
| Solvent                | CHLOROFORM-D |                       |              | Sweep Width (Hz) | 6009.62         | Temperature (degree C) |               | 27.000 |

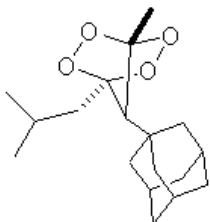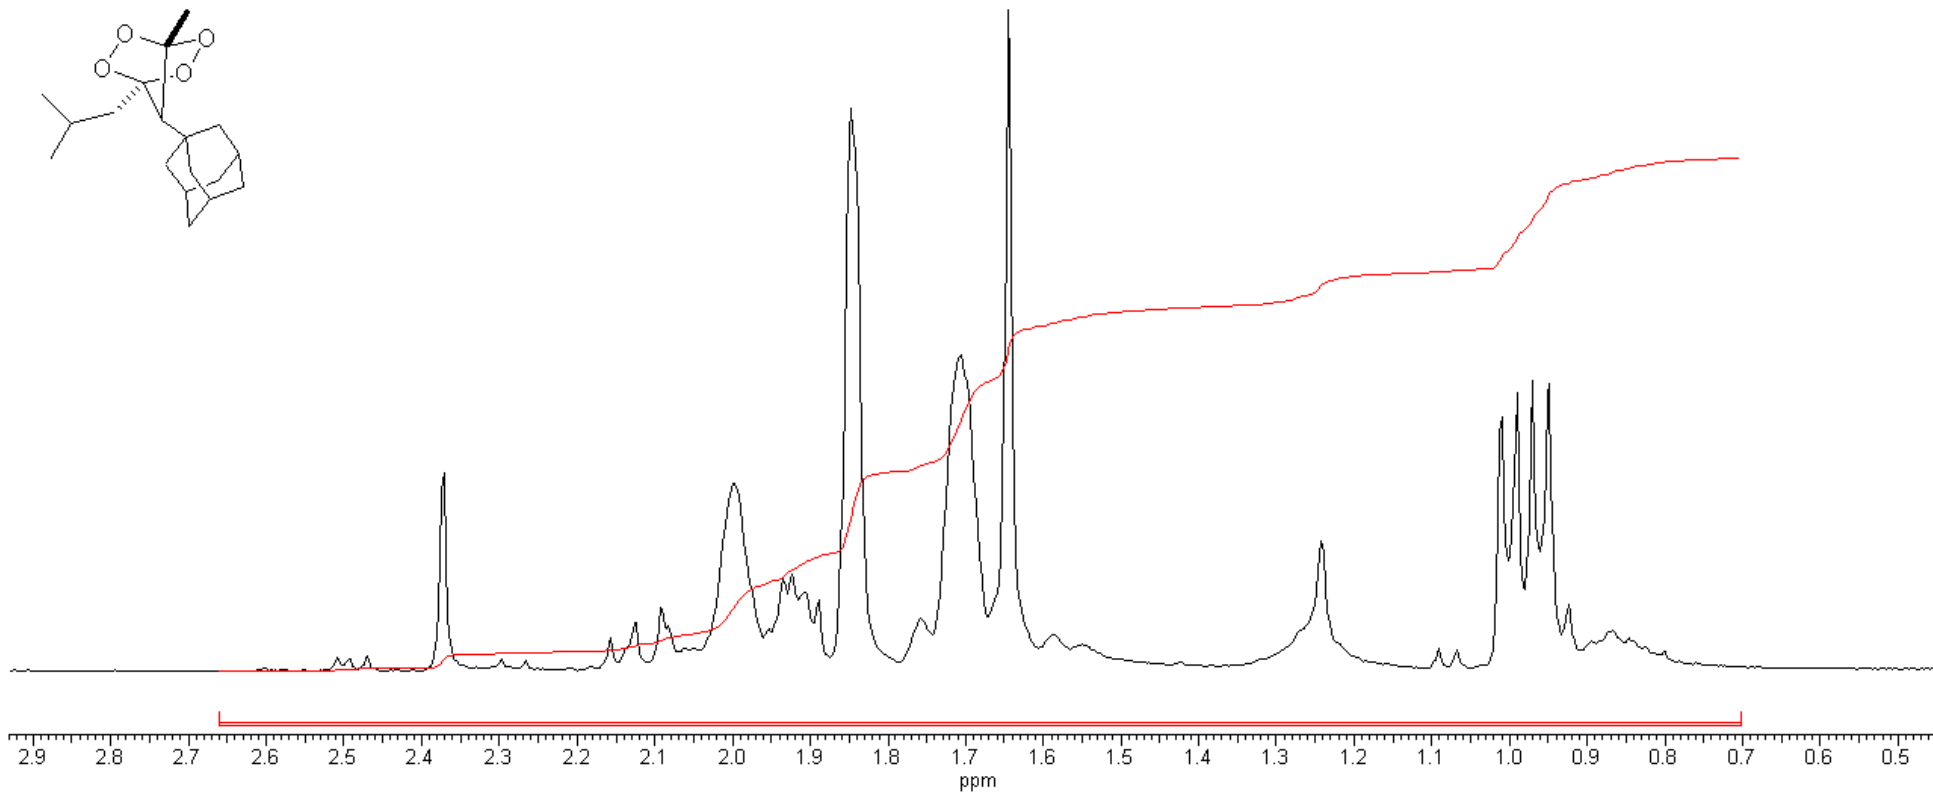

| No. | (ppm) | (Hz)   | Height | No. | Annotation   | (ppm) | No. | (ppm)      | Value   |
|-----|-------|--------|--------|-----|--------------|-------|-----|------------|---------|
| 1   | 7.25  | 2176.1 | 0.1199 | 1   | Chloroform-d | 7.25  | 1   | .70 .. 2.6 | 150.000 |



7-(1-Adamantyl)-1-isobutyl-4-methyl-2,3,5,6-tetraoxabicyclo[2.2.1]heptane (2j)

|                        |                 |                      |                         |                       |                      |
|------------------------|-----------------|----------------------|-------------------------|-----------------------|----------------------|
| Acquisition Time (sec) | 0.4501          | Comment              | Avance-300, C-13, CDCl3 | Date                  | 14 May 2012 11:01:20 |
| File Name              |                 |                      |                         | Frequency (MHz)       | 75.48                |
| Nucleus                | <sup>13</sup> C | Number of Transients | 493                     | Original Points Count | 16308                |
| Pulse Sequence         | zgpg30base      | Solvent              | CHLOROFORM-D            | Points Count          | 16384                |
| Temperature (degree C) | 25.600          |                      |                         | Sweep Width (Hz)      | 18115.94             |

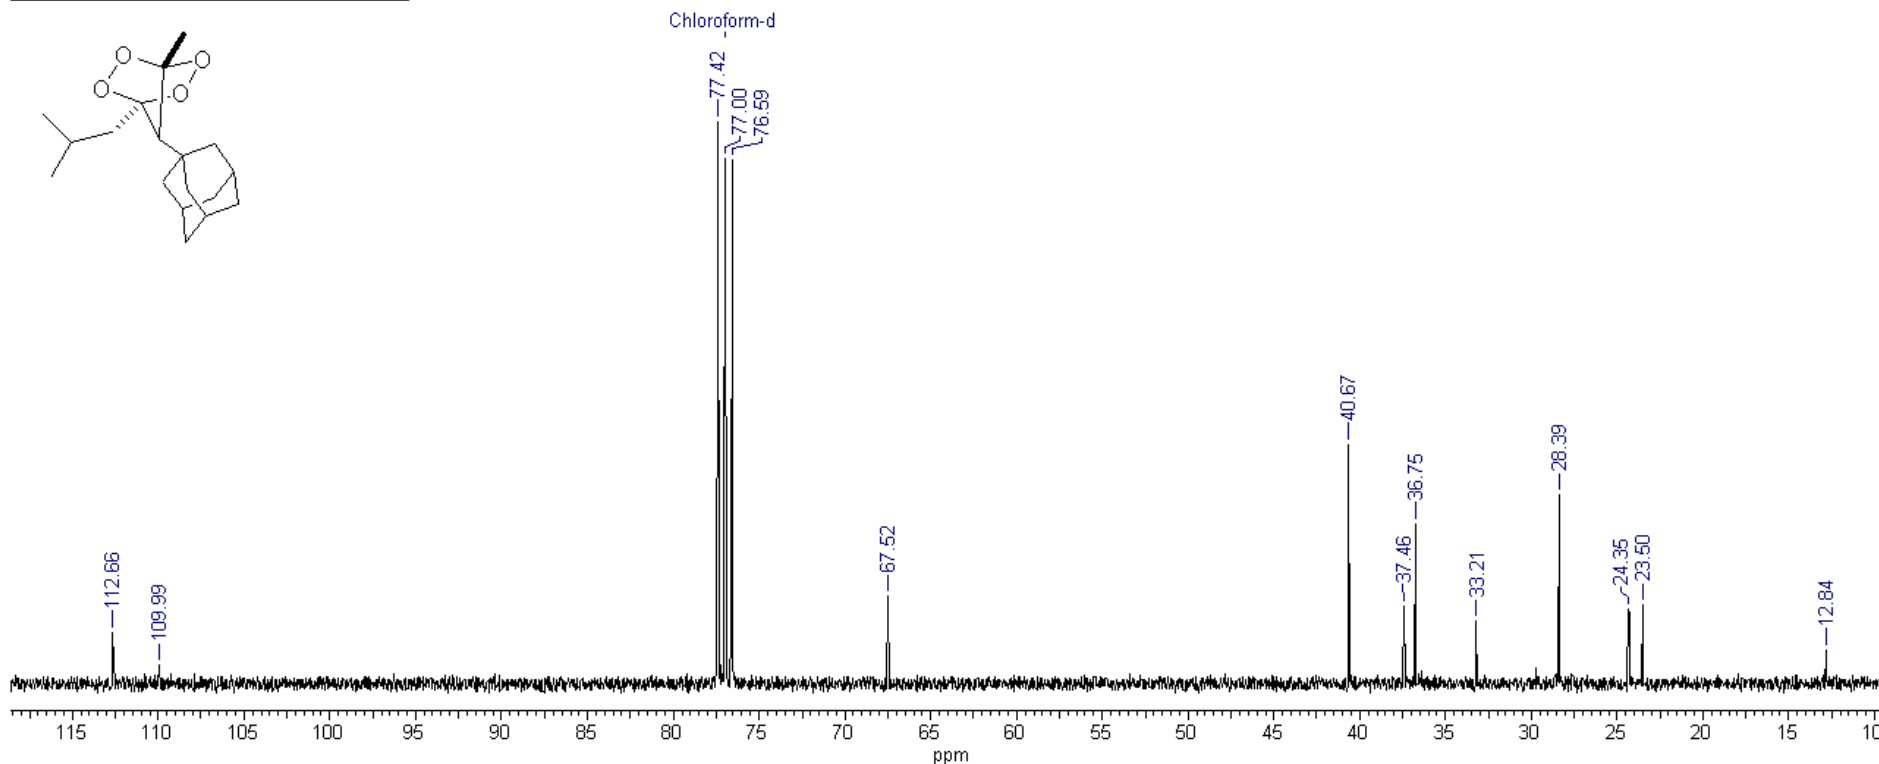

| No. | Annotation   | (ppm) |
|-----|--------------|-------|
| 1   | Chloroform-d | 77.00 |

### 7-Benzyl-1,4-dimethyl-2,3,5,6-tetraoxabicyclo[2.2.1]heptane (2k)

|                               |                |                             |              |                              |                      |
|-------------------------------|----------------|-----------------------------|--------------|------------------------------|----------------------|
| <b>Acquisition Time (sec)</b> | 0.6759         | <b>Comment</b>              | NMR.50059953 | <b>Date</b>                  | 10 Jul 2012 12:07:28 |
| <b>File Name</b>              |                |                             |              | <b>Frequency (MHz)</b>       | 300.13               |
| <b>Nucleus</b>                | <sup>1</sup> H | <b>Number of Transients</b> | 1            | <b>Original Points Count</b> | 8124                 |
| <b>Pulse Sequence</b>         | zg             | <b>Solvent</b>              | CHLOROFORM-D | <b>Points Count</b>          | 8192                 |
| <b>Temperature (degree C)</b> | 27.900         |                             |              | <b>Sweep Width (Hz)</b>      | 6009.62              |

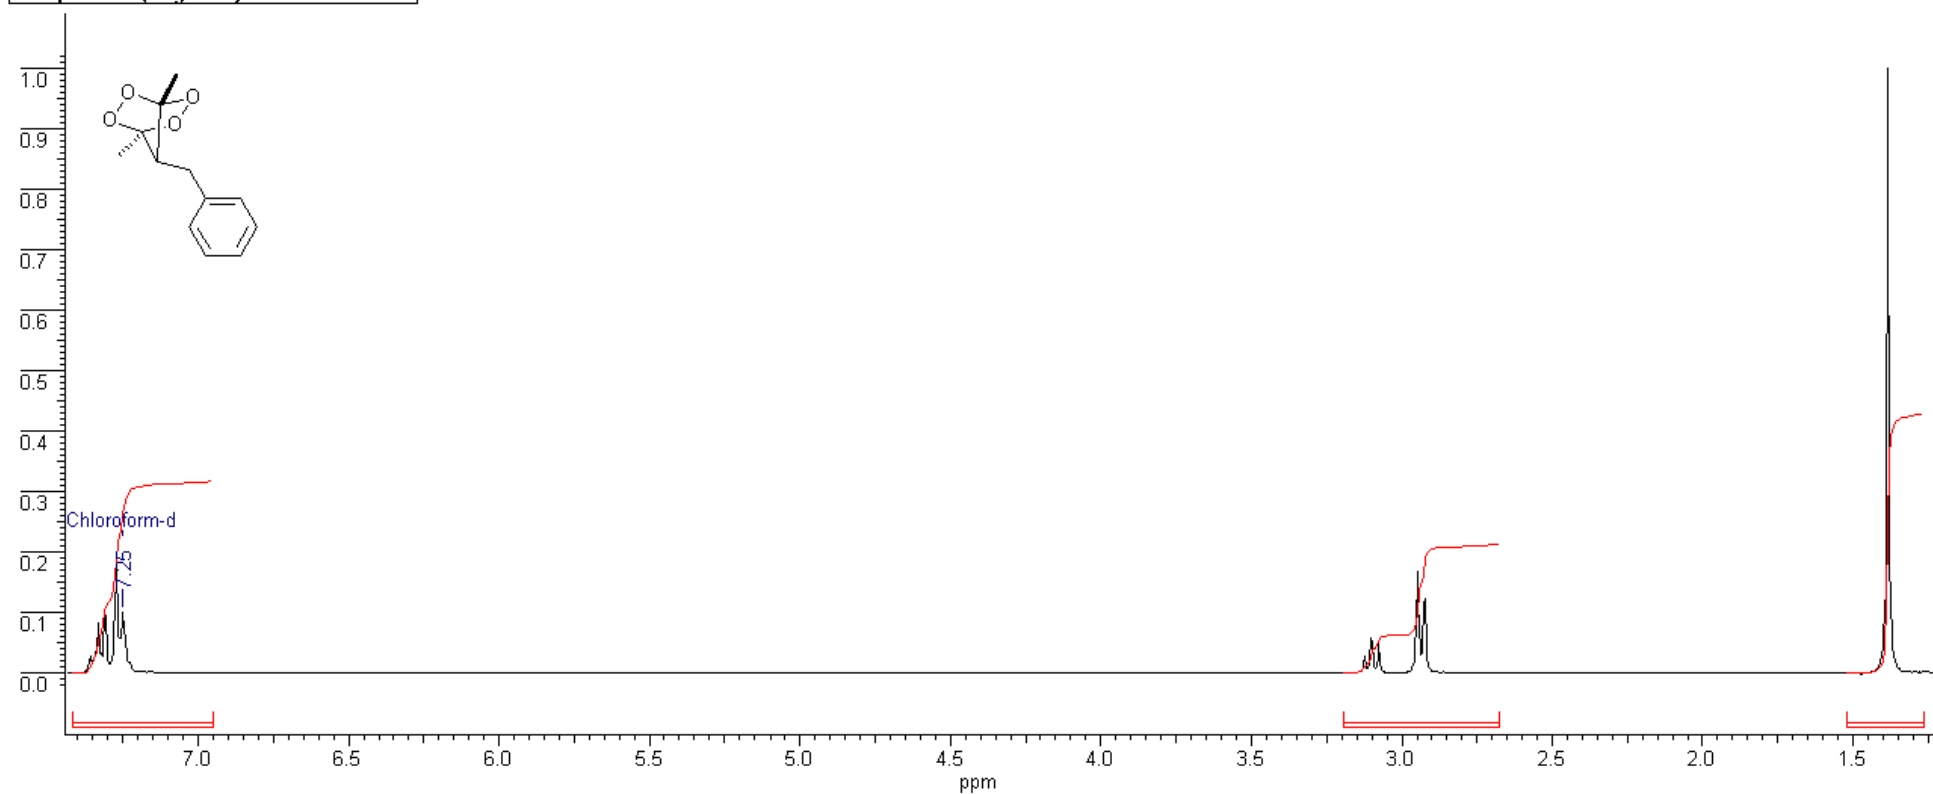

| No. | Annotation   | (ppm) |
|-----|--------------|-------|
| 1   | Chloroform-d | 7.25  |

# 1,4-Dimethyl-7-(1-phenylethyl)-2,3,5,6-tetraoxabicyclo[2.2.1]heptanes (2l)

|                               |                |                             |              |                              |                      |
|-------------------------------|----------------|-----------------------------|--------------|------------------------------|----------------------|
| <b>Acquisition Time (sec)</b> | 0.6759         | <b>Comment</b>              | NMR/50059953 | <b>Date</b>                  | 19 Apr 2012 14:24:00 |
| <b>File Name</b>              |                |                             |              | <b>Frequency (MHz)</b>       | 300.13               |
| <b>Nucleus</b>                | <sup>1</sup> H | <b>Number of Transients</b> | 1            | <b>Original Points Count</b> | 8124                 |
| <b>Pulse Sequence</b>         | zg             | <b>Solvent</b>              | CHLOROFORM-D | <b>Points Count</b>          | 8192                 |
| <b>Temperature (degree C)</b> | 27.000         |                             |              | <b>Sweep Width (Hz)</b>      | 6009.62              |

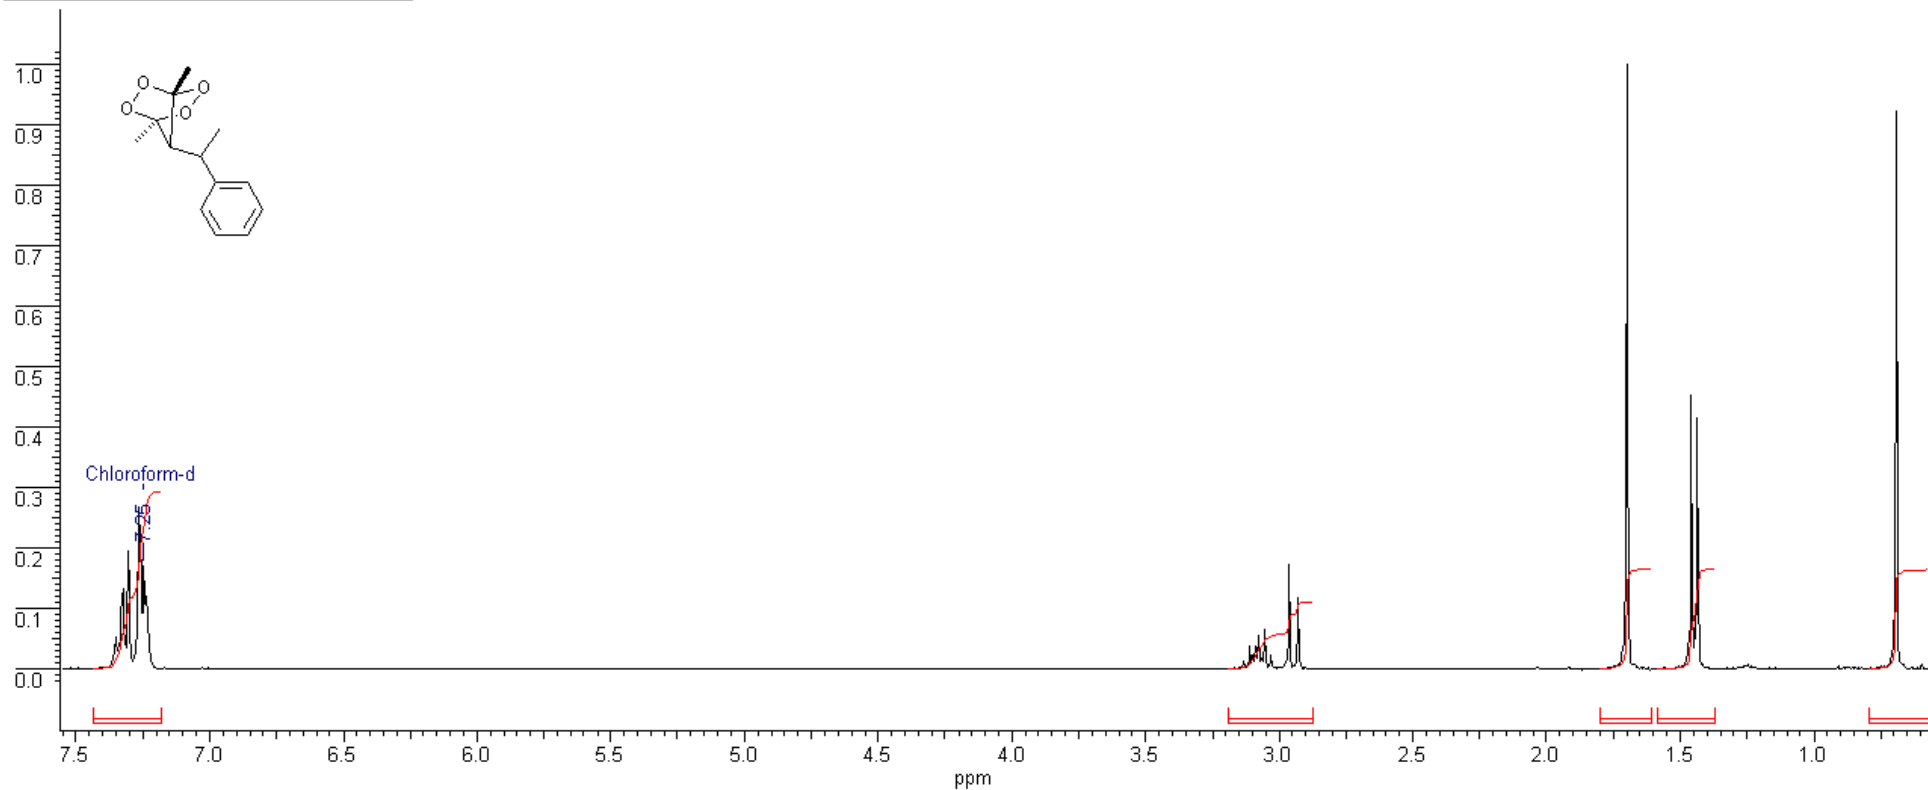

| No. | Annotation   | (ppm) |
|-----|--------------|-------|
| 1   | Chloroform-d | 7.25  |

# 1,4-Dimethyl-7-(1-phenylethyl)-2,3,5,6-tetraoxabicyclo[2.2.1]heptane (2l)

|                        |            |                      |                         |                       |                  |                      |       |
|------------------------|------------|----------------------|-------------------------|-----------------------|------------------|----------------------|-------|
| Acquisition Time (sec) | 0.4501     | Comment              | Avance-300, C-13, CDC13 |                       | Date             | 18 Jan 2012 14:43:12 |       |
| File Name              |            |                      |                         |                       | Frequency (MHz)  | 75.48                |       |
| Nucleus                | 13C        | Number of Transients | 92                      | Original Points Count | 16308            | Points Count         | 16384 |
| Pulse Sequence         | zgpg30base | Solvent              | CHLOROFORM-D            |                       | Sweep Width (Hz) | 18115.94             |       |
| Temperature (degree C) | 27.000     |                      |                         |                       |                  |                      |       |

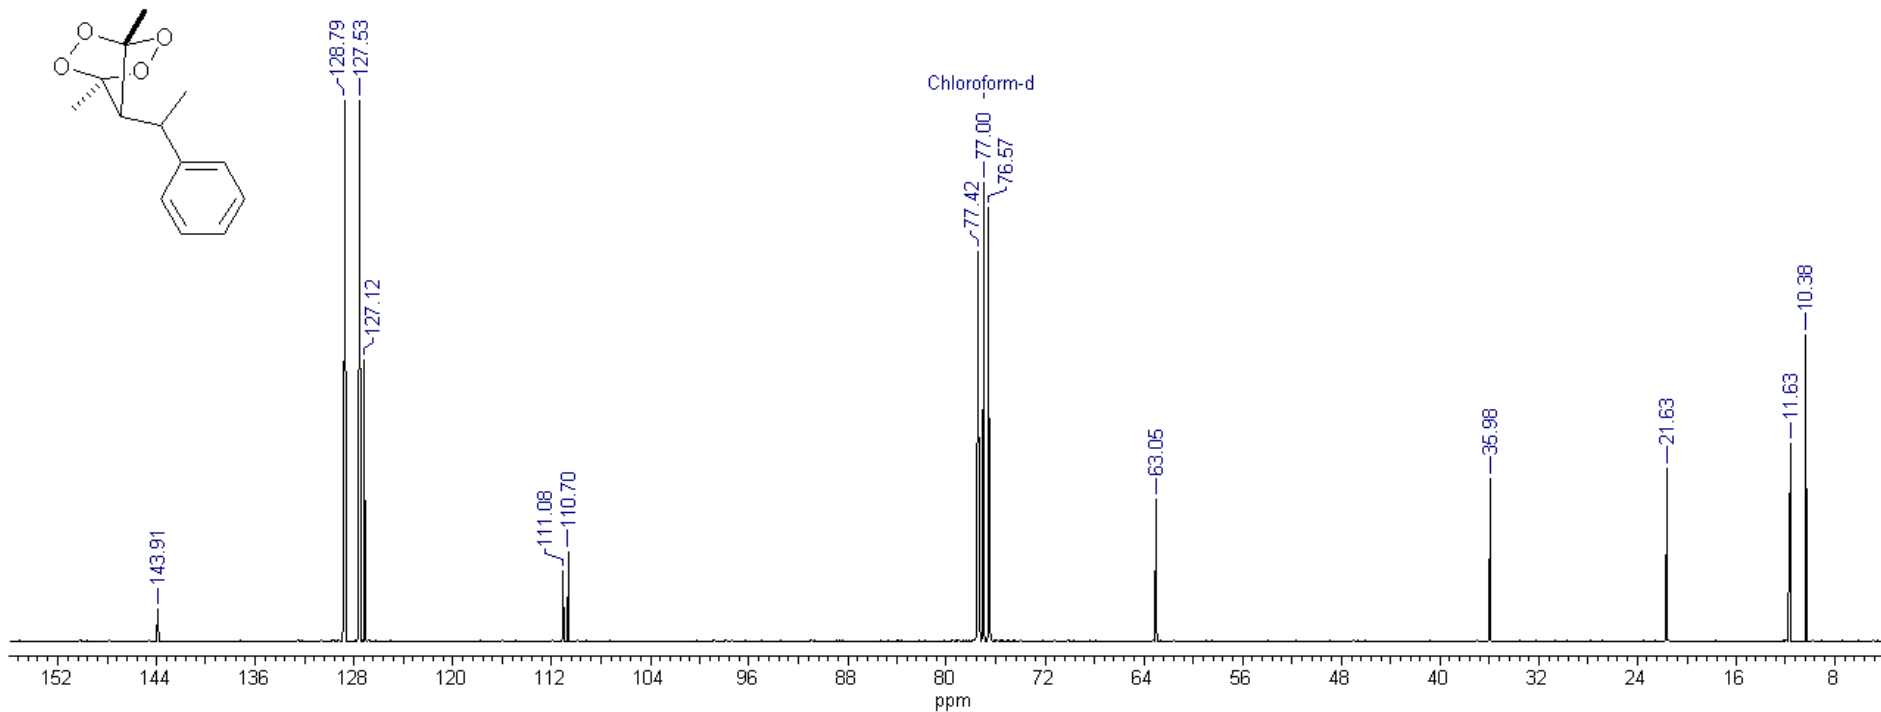

| No. | (ppm) | (Hz)   | Height | No. | (ppm)  | (Hz)    | Height |
|-----|-------|--------|--------|-----|--------|---------|--------|
| 1   | 10.38 | 783.7  | 0.2908 | 8   | 77.42  | 5843.7  | 0.3690 |
| 2   | 11.63 | 877.7  | 0.1873 | 9   | 110.70 | 8354.9  | 0.0849 |
| 3   | 21.63 | 1632.9 | 0.1641 | 10  | 111.08 | 8383.7  | 0.0671 |
| 4   | 35.98 | 2715.5 | 0.1547 | 11  | 127.12 | 9594.5  | 0.2677 |
| 5   | 63.05 | 4758.9 | 0.1349 | 12  | 127.53 | 9625.5  | 1.0000 |
| 6   | 76.57 | 5779.6 | 0.4110 | 13  | 128.79 | 9720.6  | 0.9970 |
| 7   | 77.00 | 5811.6 | 0.4348 | 14  | 143.91 | 10861.7 | 0.0303 |

| No. | Annotation   | (ppm) |
|-----|--------------|-------|
| 1   | Chloroform-d | 77.00 |

**1,4-Dimethyl-7-[1-(4-methylphenyl)ethyl]-2,3,5,6-tetraoxabicyclo[2.2.1]heptane (2m)**

|                               |                |                             |              |                              |                      |
|-------------------------------|----------------|-----------------------------|--------------|------------------------------|----------------------|
| <b>Acquisition Time (sec)</b> | 0.6759         | <b>Comment</b>              | NMR/50059953 | <b>Date</b>                  | 19 Apr 2012 14:28:16 |
| <b>File Name</b>              |                |                             |              | <b>Frequency (MHz)</b>       | 300.13               |
| <b>Nucleus</b>                | <sup>1</sup> H | <b>Number of Transients</b> | 1            | <b>Original Points Count</b> | 8124                 |
| <b>Pulse Sequence</b>         | zg             | <b>Solvent</b>              | CHLOROFORM-D | <b>Points Count</b>          | 8192                 |
| <b>Temperature (degree C)</b> | 26.900         |                             |              | <b>Sweep Width (Hz)</b>      | 6009.62              |

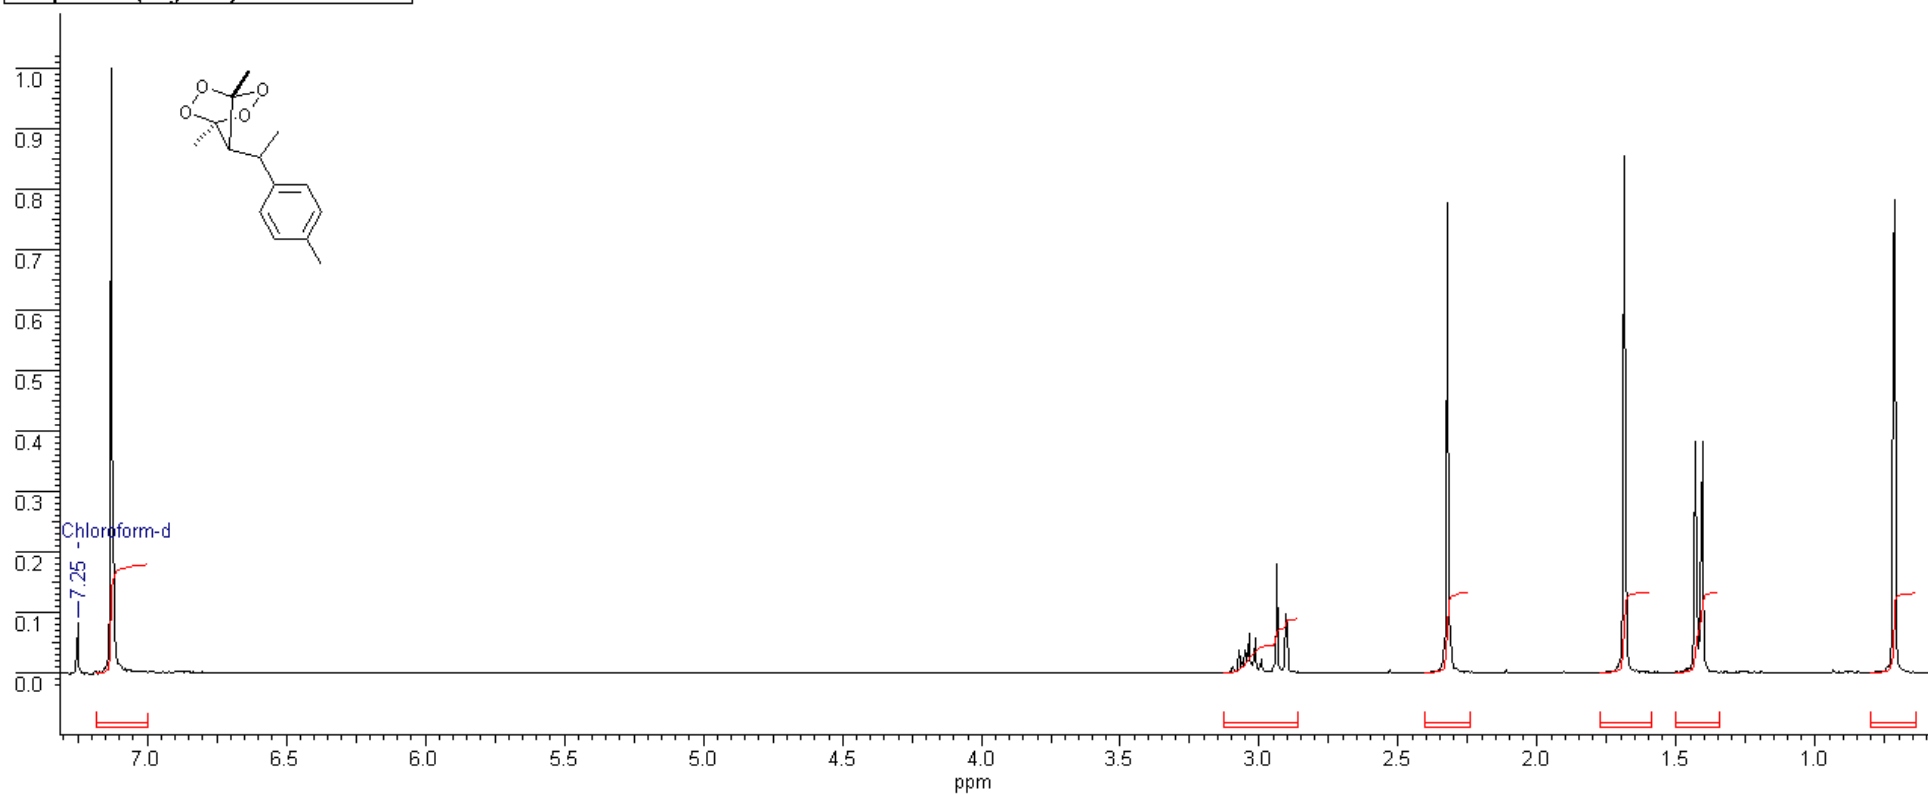

| No. | Annotation   | (ppm) |
|-----|--------------|-------|
| 1   | Chloroform-d | 7.25  |

1,4-Dimethyl-7-[1-(4-methylphenyl)ethyl]-2,3,5,6-tetraoxabicyclo[2.2.1]heptane (2m)

|                        |            |                      |                         |                       |                      |
|------------------------|------------|----------------------|-------------------------|-----------------------|----------------------|
| Acquisition Time (sec) | 0.4501     | Comment              | Avance-300, C-13, CDCl3 | Date                  | 18 Jan 2012 13:17:52 |
| File Name              |            |                      |                         | Frequency (MHz)       | 75.48                |
| Nucleus                | 13C        | Number of Transients | 101                     | Original Points Count | 16308                |
| Pulse Sequence         | zgpg30base | Solvent              | CHLOROFORM-D            | Points Count          | 16384                |
| Temperature (degree C) | 26.500     |                      |                         | Sweep Width (Hz)      | 18115.94             |

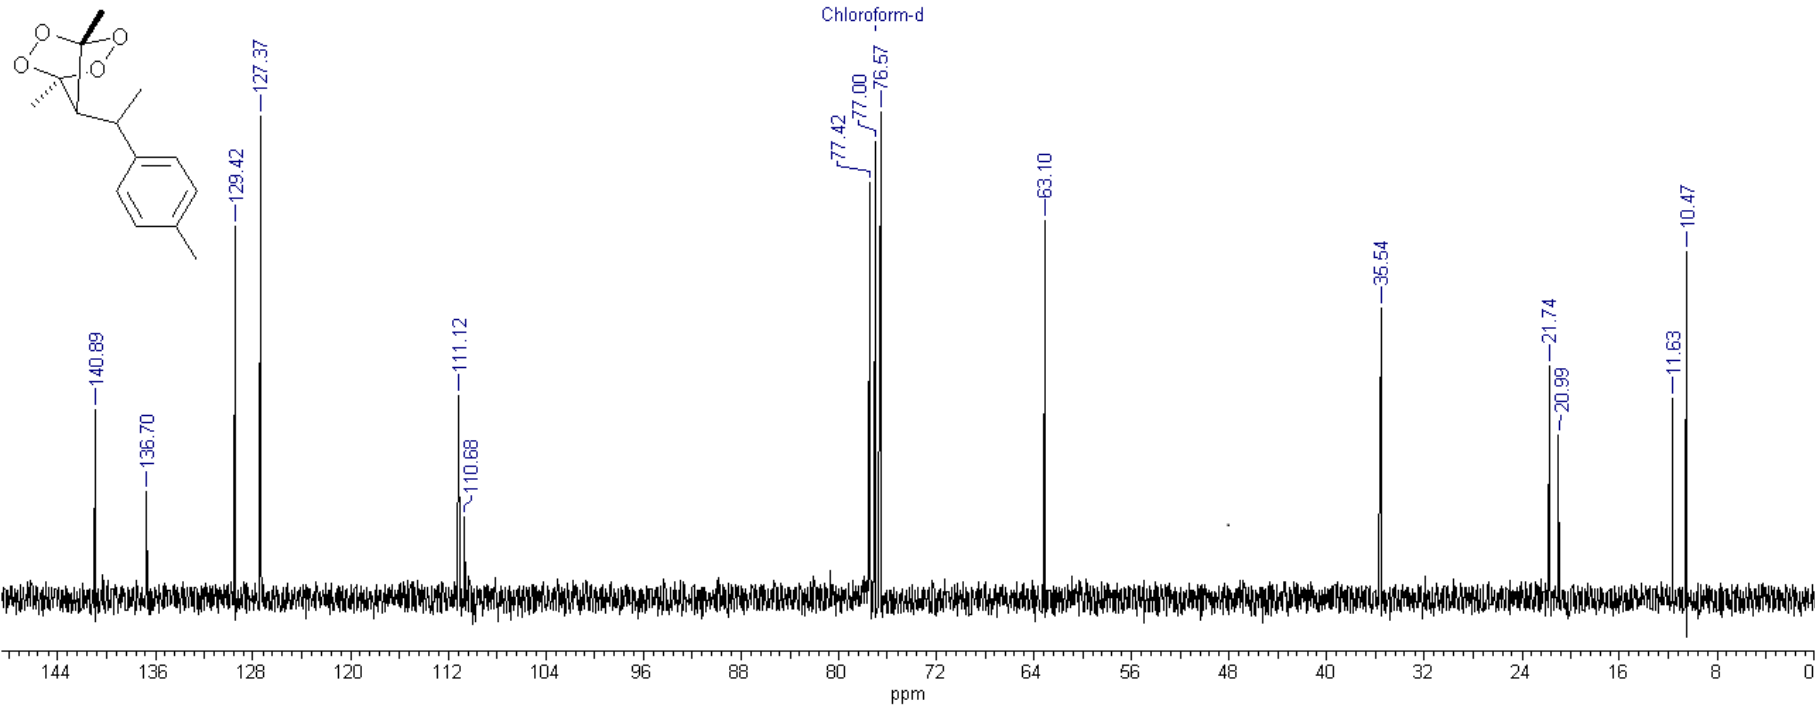

| No. | (ppm) | (Hz)   | Height | No. | (ppm)  | (Hz)    | Height | No. | Annotation   | (ppm) |
|-----|-------|--------|--------|-----|--------|---------|--------|-----|--------------|-------|
| 1   | 10.47 | 790.3  | 0.7108 | 9   | 77.42  | 5843.7  | 0.8542 | 1   | Chloroform-d | 77.00 |
| 2   | 11.63 | 877.6  | 0.4126 | 10  | 110.68 | 8353.8  | 0.1894 |     |              |       |
| 3   | 20.99 | 1584.2 | 0.3350 | 11  | 111.12 | 8387.0  | 0.4186 |     |              |       |
| 4   | 21.74 | 1640.6 | 0.4780 | 12  | 127.37 | 9613.3  | 0.9908 |     |              |       |
| 5   | 35.54 | 2682.3 | 0.5962 | 13  | 129.42 | 9768.1  | 0.7639 |     |              |       |
| 6   | 63.10 | 4762.2 | 0.7774 | 14  | 136.70 | 10317.7 | 0.2192 |     |              |       |
| 7   | 76.57 | 5779.6 | 1.0000 | 15  | 140.89 | 10633.9 | 0.3886 |     |              |       |
| 8   | 77.00 | 5811.6 | 0.9393 |     |        |         |        |     |              |       |

**7-[1-(4-Bromophenyl)ethyl]-1,4-dimethyl-2,3,5,6-tetraoxabicyclo[2.2.1]heptane (2n)**

|                               |                |                             |              |                              |                      |
|-------------------------------|----------------|-----------------------------|--------------|------------------------------|----------------------|
| <b>Acquisition Time (sec)</b> | 0.6759         | <b>Comment</b>              | NMR/50059953 | <b>Date</b>                  | 19 Apr 2012 14:41:04 |
| <b>File Name</b>              |                |                             |              | <b>Frequency (MHz)</b>       | 300.13               |
| <b>Nucleus</b>                | <sup>1</sup> H | <b>Number of Transients</b> | 1            | <b>Original Points Count</b> | 8124                 |
| <b>Pulse Sequence</b>         | zg             | <b>Solvent</b>              | CHLOROFORM-D | <b>Points Count</b>          | 8192                 |
| <b>Temperature (degree C)</b> | 27.000         |                             |              | <b>Sweep Width (Hz)</b>      | 6009.62              |

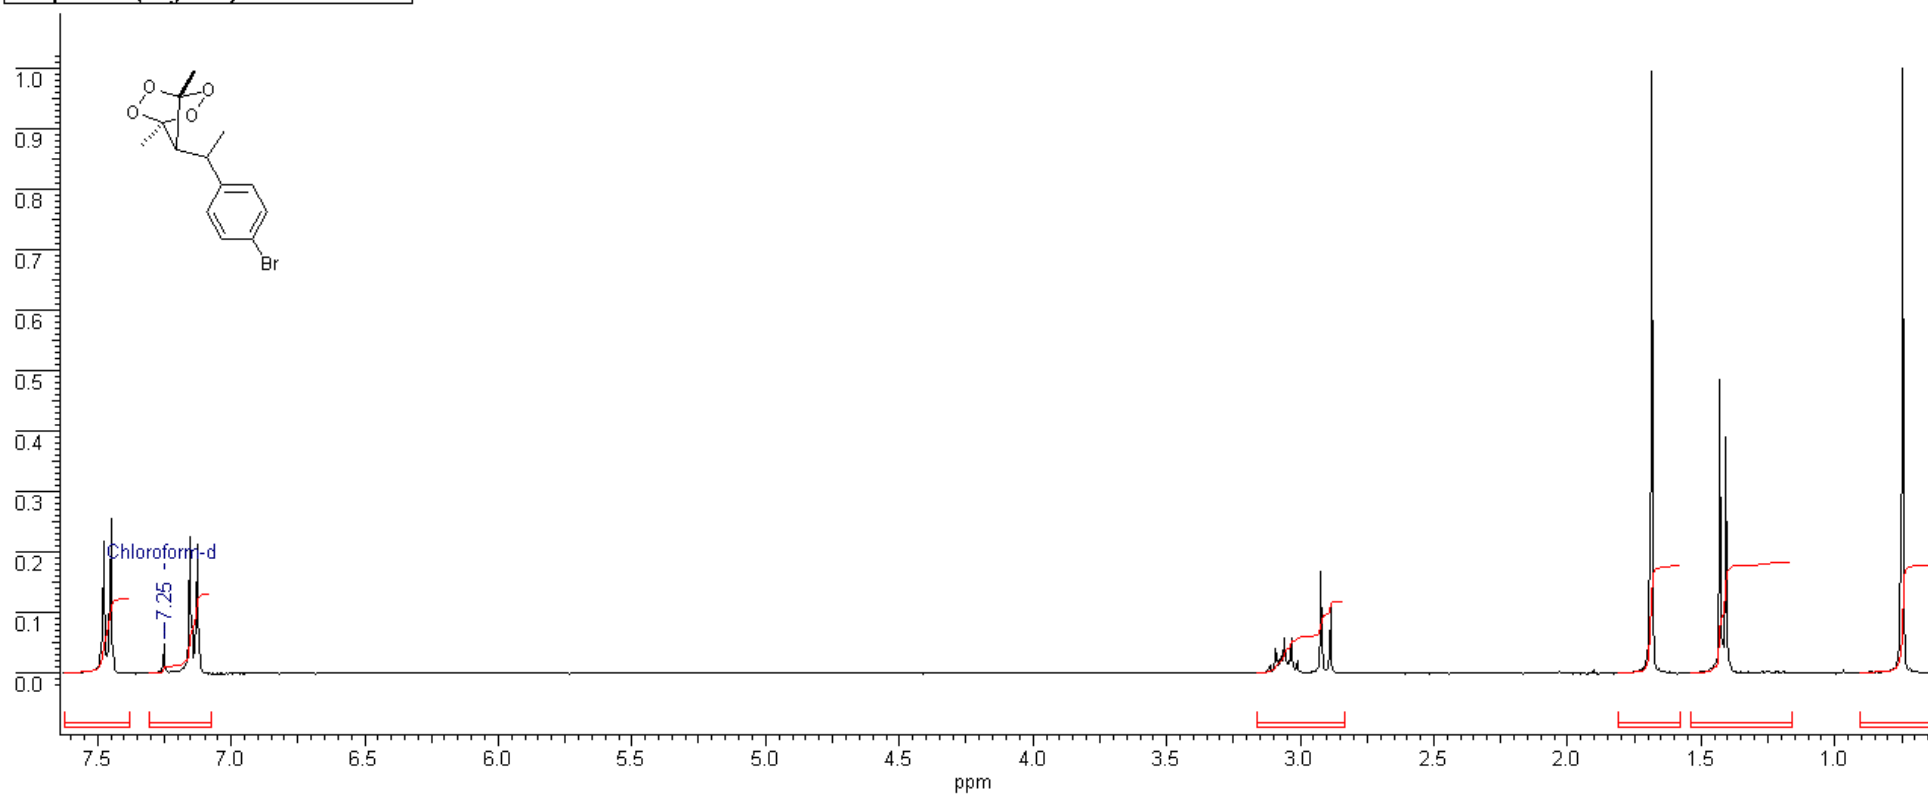

| No. | Annotation   | (ppm) |
|-----|--------------|-------|
| 1   | Chloroform-d | 7.25  |

7-[1-(4-Bromophenyl)ethyl]-1,4-dimethyl-2,3,5,6-tetraoxabicyclo[2.2.1]heptanes (2n)

|                        |            |                      |                        |                       |                      |
|------------------------|------------|----------------------|------------------------|-----------------------|----------------------|
| Acquisition Time (sec) | 0.4501     | Comment              | Avance-300, C-13, CDCB | Date                  | 19 Apr 2012 14:43:12 |
| File Name              |            |                      |                        | Frequency (MHz)       | 75.48                |
| Nucleus                | 13C        | Number of Transients | 218                    | Original Points Count | 16308                |
| Pulse Sequence         | zgpg30base | Solvent              | CHLOROFORM-D           | Points Count          | 16384                |
| Temperature (degree C) | 27.000     |                      |                        | Sweep Width (Hz)      | 18115.94             |

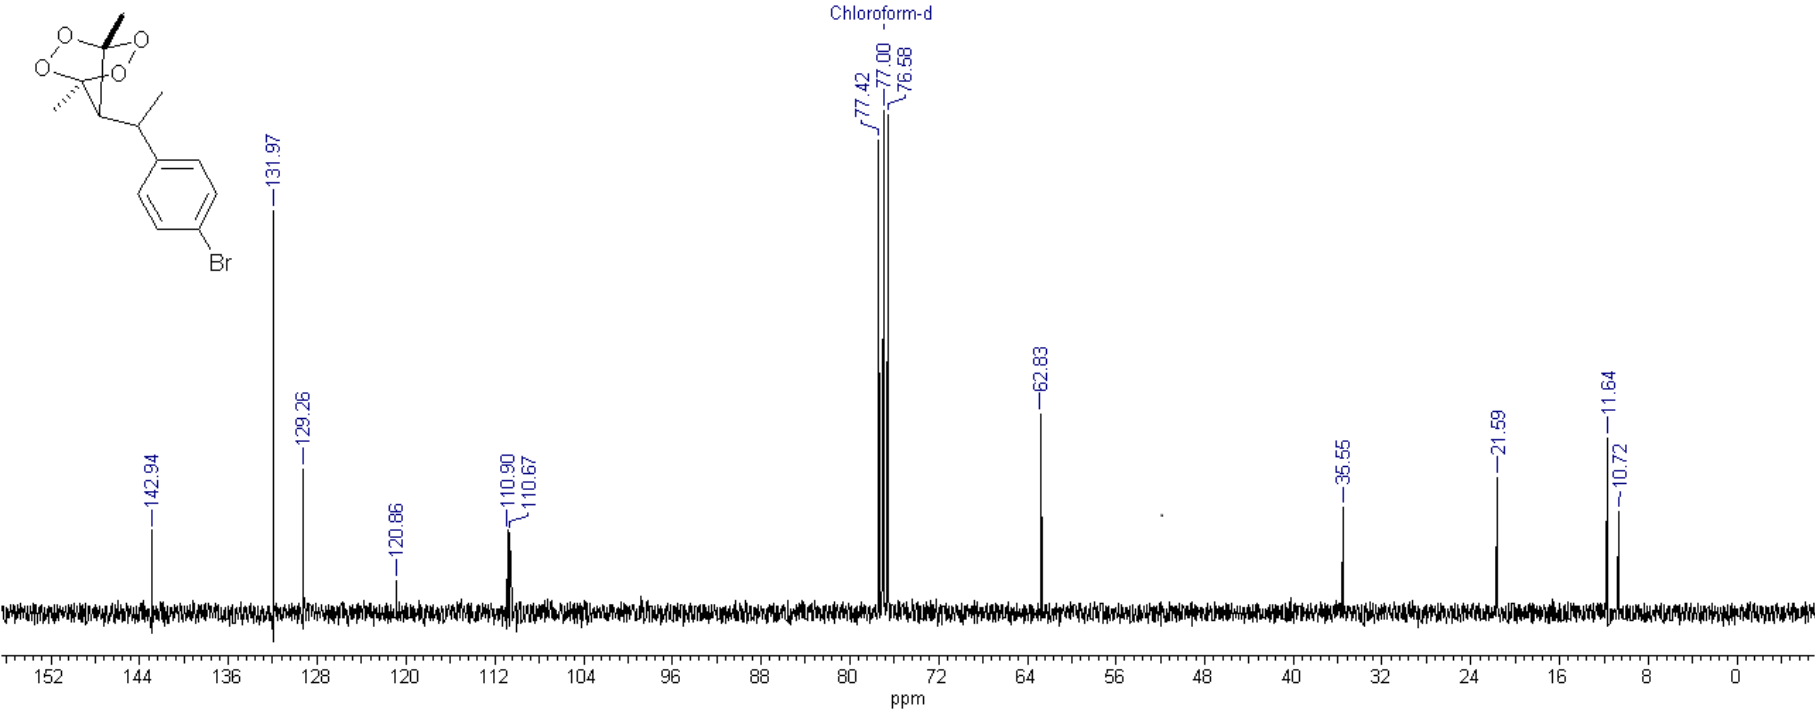

| No. | (ppm) | (Hz)   | Height | No. | (ppm)  | (Hz)    | Height | No. | Annotation   | (ppm) |
|-----|-------|--------|--------|-----|--------|---------|--------|-----|--------------|-------|
| 1   | 10.72 | 809.1  | 0.1999 | 8   | 77.42  | 5843.7  | 0.9386 | 1   | Chloroform-d | 77.00 |
| 2   | 11.64 | 878.8  | 0.3489 | 9   | 110.67 | 8352.7  | 0.1591 |     |              |       |
| 3   | 21.59 | 1629.6 | 0.2702 | 10  | 110.90 | 8370.4  | 0.1630 |     |              |       |
| 4   | 35.55 | 2683.4 | 0.2093 | 11  | 120.86 | 9122.4  | 0.0640 |     |              |       |
| 5   | 62.83 | 4742.4 | 0.3952 | 12  | 129.26 | 9756.0  | 0.2871 |     |              |       |
| 6   | 76.58 | 5779.6 | 0.9898 | 13  | 131.97 | 9960.5  | 0.7994 |     |              |       |
| 7   | 77.00 | 5811.7 | 1.0000 | 14  | 142.94 | 10788.8 | 0.1628 |     |              |       |



**1,7-Dimethyl-4-phenyl-2,3,5,6-tetraoxabicyclo[2.2.1]heptane (2o)**

|                        |        |                      |                  |                       |                      |              |      |
|------------------------|--------|----------------------|------------------|-----------------------|----------------------|--------------|------|
| Acquisition Time (sec) | 0.6759 | Comment              | /T SFC mk1324.32 | Date                  | 20 Jul 2012 12:13:52 |              |      |
| File Name              |        |                      |                  | Frequency (MHz)       | 300.13               |              |      |
| Nucleus                | 1H     | Number of Transients | 1                | Original Points Count | 8124                 | Points Count | 8192 |
| Pulse Sequence         | zg     | Solvent              | CHLOROFORM-D     |                       | Sweep Width (Hz)     | 6009.62      |      |
| Temperature (degree C) | 30.000 |                      |                  |                       |                      |              |      |

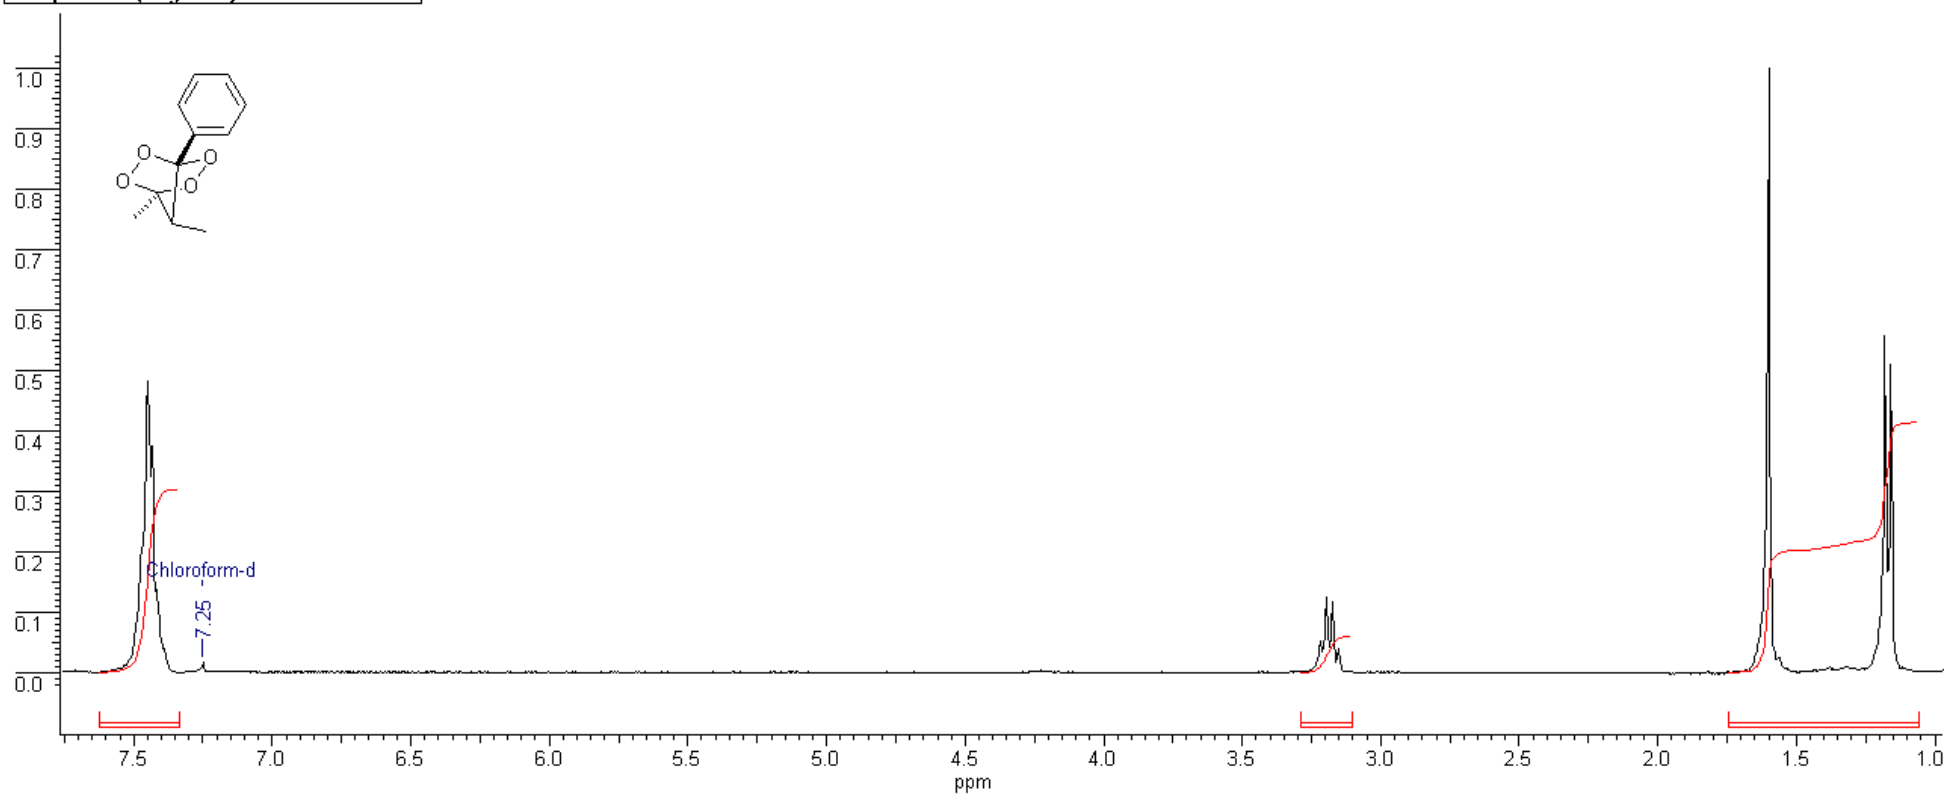

| No. | Annotation   | (ppm) |
|-----|--------------|-------|
| 1   | Chloroform-d | 7.25  |

# 1,7-Dimethyl-4-phenyl-2,3,5,6-tetraoxabicyclo[2.2.1]heptane (2o)

|                        |             |                      |                         |                       |          |                        |                      |
|------------------------|-------------|----------------------|-------------------------|-----------------------|----------|------------------------|----------------------|
| Acquisition Time (sec) | 0.8643      | Comment              | Avance-300, C-13, CDCl3 |                       |          | Date                   | 20 Jul 2012 12:18:08 |
| File Name              |             |                      |                         |                       |          | Frequency (MHz)        | 75.48                |
| Nucleus                | 13C         | Number of Transients | 128                     | Original Points Count | 16308    | Points Count           | 16384                |
| Pulse Sequence         | zgpg30 base | Solvent              | CHLOROFORM-D            | Sweep Width (Hz)      | 18867.92 | Temperature (degree C) | 30.000               |

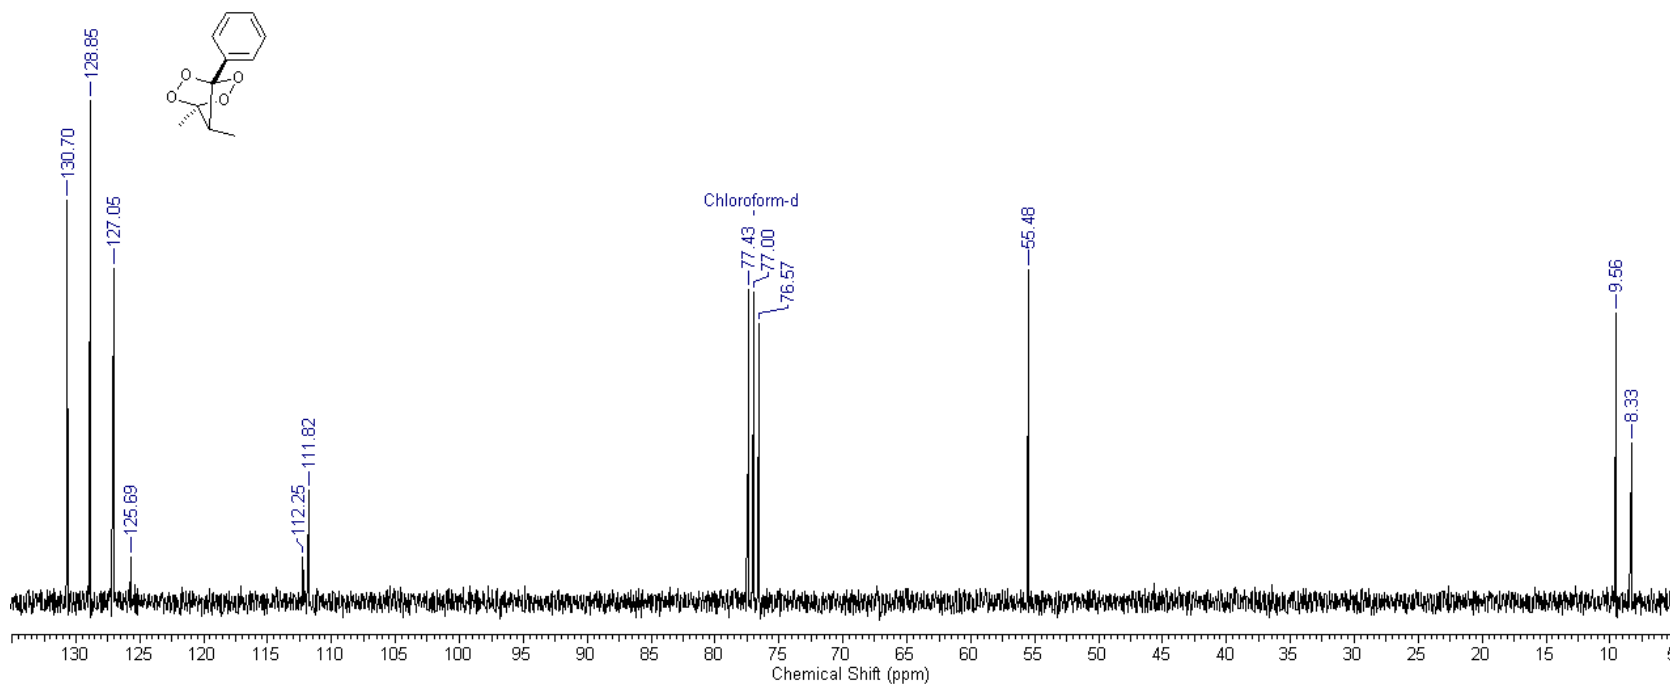

| No. | (ppm)  | (Hz)   | Height |
|-----|--------|--------|--------|
| 1   | 8.33   | 629.1  | 0.3163 |
| 2   | 9.56   | 721.2  | 0.5757 |
| 3   | 55.48  | 4187.8 | 0.6632 |
| 4   | 76.57  | 5779.4 | 0.5547 |
| 5   | 77.00  | 5811.6 | 0.6193 |
| 6   | 77.43  | 5843.9 | 0.6224 |
| 7   | 111.82 | 8439.8 | 0.2216 |
| 8   | 112.25 | 8472.0 | 0.0877 |
| 9   | 125.69 | 9486.6 | 0.0900 |
| 10  | 127.05 | 9589.1 | 0.6653 |
| 11  | 128.85 | 9725.0 | 1.0000 |
| 12  | 130.70 | 9864.4 | 0.8021 |

| No. | Annotation   | (ppm) |
|-----|--------------|-------|
| 1   | Chloroform-d | 77.00 |

**7-Benzyl-1-methyl-4-phenyl-2,3,5,6-tetraoxabicyclo[2.2.1]heptane (2p)**

|                               |                |                             |              |                              |                      |
|-------------------------------|----------------|-----------------------------|--------------|------------------------------|----------------------|
| <b>Acquisition Time (sec)</b> | 0.6759         | <b>Comment</b>              | NMR/50059953 | <b>Date</b>                  | 30 May 2012 15:36:32 |
| <b>File Name</b>              |                |                             |              | <b>Frequency (MHz)</b>       | 300.13               |
| <b>Nucleus</b>                | <sup>1</sup> H | <b>Number of Transients</b> | 1            | <b>Original Points Count</b> | 8124                 |
| <b>Pulse Sequence</b>         | zg             | <b>Solvent</b>              | CHLOROFORM-D | <b>Points Count</b>          | 8192                 |
| <b>Temperature (degree C)</b> | 26.700         |                             |              | <b>Sweep Width (Hz)</b>      | 6009.62              |

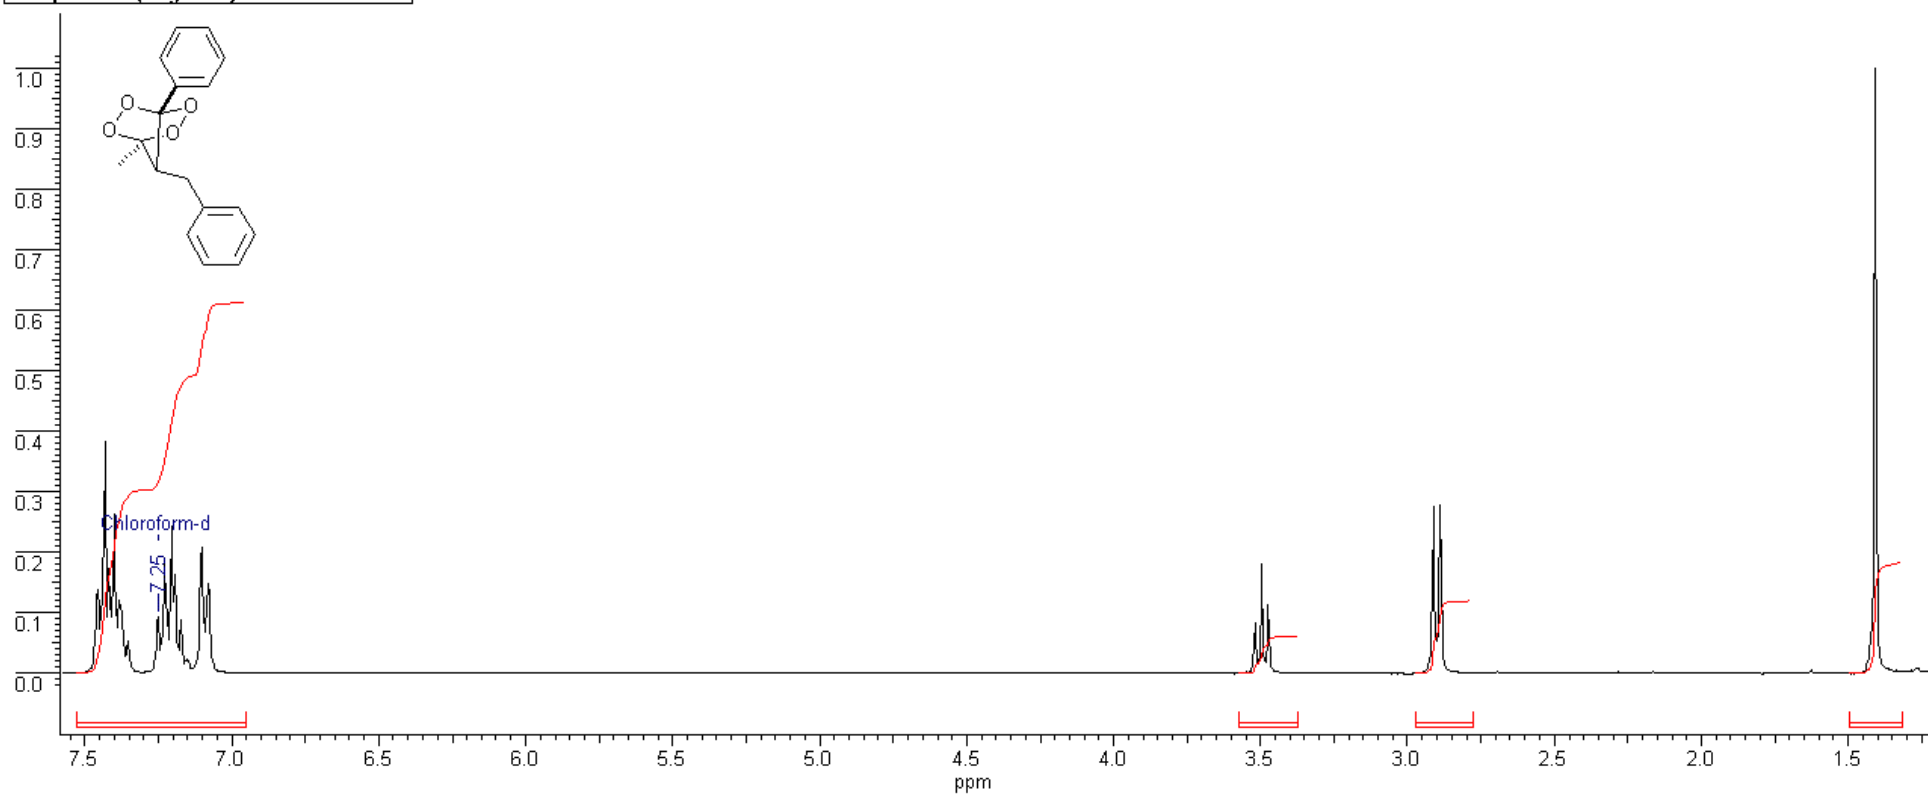

| No. | Annotation   | (ppm) |
|-----|--------------|-------|
| 1   | Chloroform-d | 7.25  |

7-Benzyl-1-methyl-4-phenyl-2,3,5,6-tetraoxabicyclo[2.2.1]heptane (2p)

|                        |            |                      |                         |                        |                      |
|------------------------|------------|----------------------|-------------------------|------------------------|----------------------|
| Acquisition Time (sec) | 0.9002     | Comment              | Avance-300, C-13, CDCl3 | Date                   | 30 May 2012 15:38:40 |
| File Name              |            |                      |                         | Frequency (MHz)        | 75.48                |
| Nucleus                | 13C        | Number of Transients | 245                     | Original Points Count  | 16308                |
| Pulse Sequence         | zgpg30base | Solvent              | CHLOROFORM-D            | Points Count           | 16384                |
|                        |            |                      |                         | Sweep Width (Hz)       | 18115.94             |
|                        |            |                      |                         | Temperature (degree C) | 26.800               |

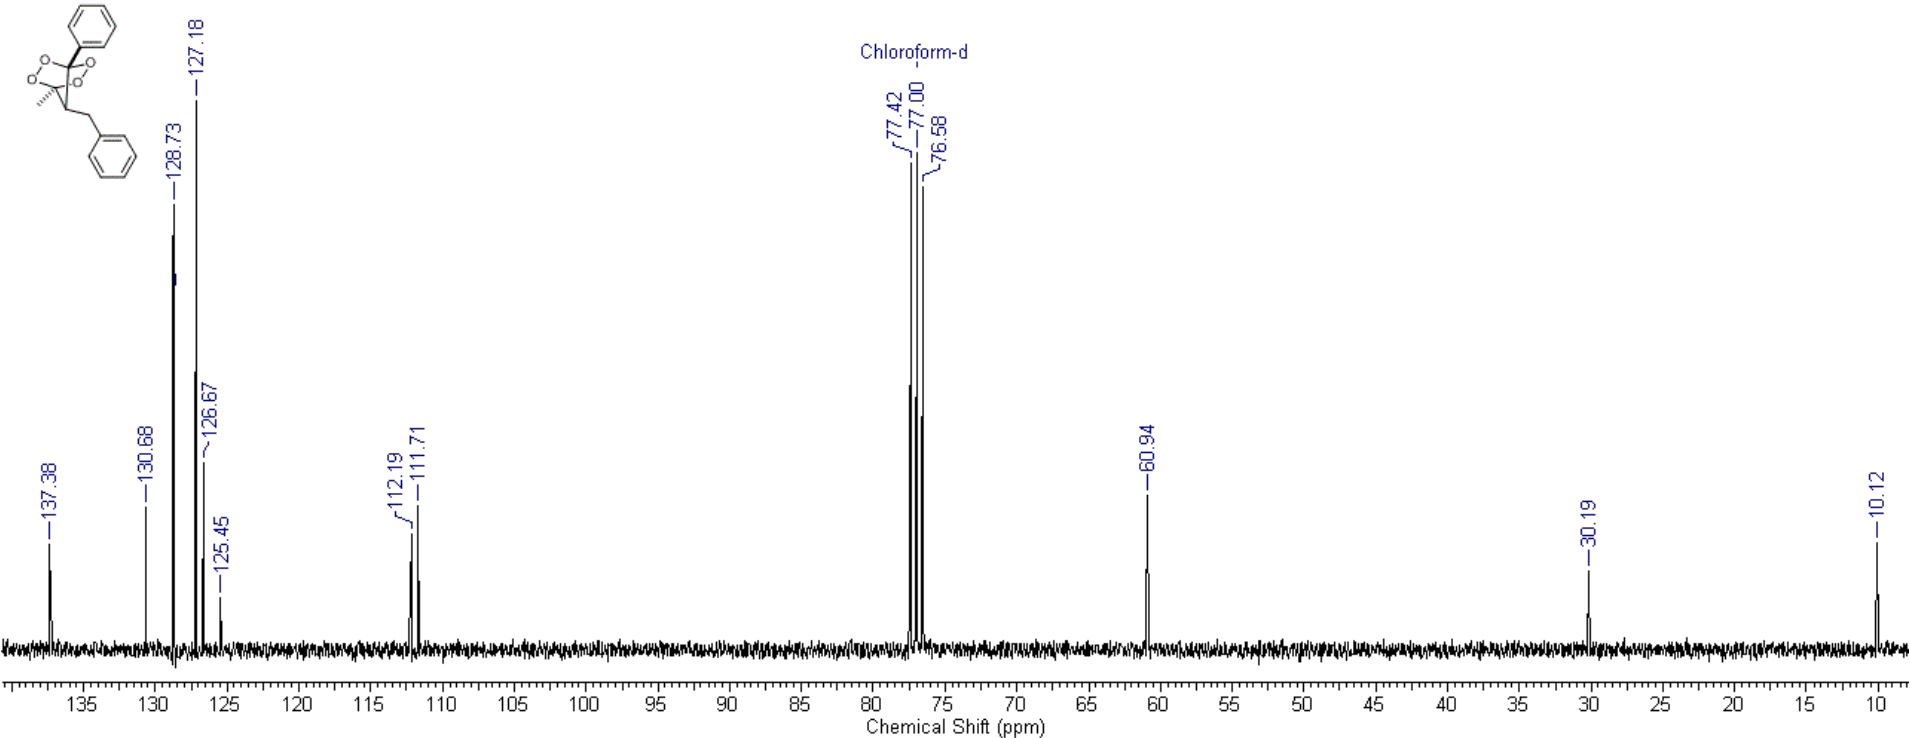

| No. | (ppm)  | (Hz)   | Height | No. | (ppm)  | (Hz)    | Height | No. | Annotation   | (ppm) |
|-----|--------|--------|--------|-----|--------|---------|--------|-----|--------------|-------|
| 1   | 10.12  | 763.8  | 0.1954 | 9   | 125.45 | 9468.5  | 0.0962 | 1   | Chloroform-d | 77.00 |
| 2   | 30.19  | 2278.7 | 0.1434 | 10  | 126.67 | 9560.2  | 0.3411 |     |              |       |
| 3   | 60.94  | 4599.7 | 0.2812 | 11  | 127.18 | 9598.9  | 1.0000 |     |              |       |
| 4   | 76.58  | 5779.6 | 0.8442 | 12  | 128.61 | 9707.3  | 0.6548 |     |              |       |
| 5   | 77.00  | 5811.7 | 0.9062 | 13  | 128.73 | 9716.2  | 0.8115 |     |              |       |
| 6   | 77.42  | 5843.7 | 0.8861 | 14  | 128.79 | 9720.6  | 0.6982 |     |              |       |
| 7   | 111.71 | 8431.2 | 0.2623 | 15  | 130.68 | 9863.2  | 0.2606 |     |              |       |
| 8   | 112.19 | 8467.7 | 0.2120 | 16  | 137.38 | 10368.6 | 0.1924 |     |              |       |

# 1,4-Diphenyl-7-methyl-2,3,5,6-tetraoxabicyclo[2.2.1]heptane (2q)

|                               |                |                             |              |                              |                      |
|-------------------------------|----------------|-----------------------------|--------------|------------------------------|----------------------|
| <b>Acquisition Time (sec)</b> | 0.6759         | <b>Comment</b>              | AGOR NH0023  | <b>Date</b>                  | 19 Jul 2012 14:09:04 |
| <b>File Name</b>              |                |                             |              | <b>Frequency (MHz)</b>       | 300.13               |
| <b>Nucleus</b>                | <sup>1</sup> H | <b>Number of Transients</b> | 1            | <b>Original Points Count</b> | 8124                 |
| <b>Pulse Sequence</b>         | zg             | <b>Solvent</b>              | CHLOROFORM-D | <b>Points Count</b>          | 8192                 |
| <b>Temperature (degree C)</b> | 27.600         |                             |              | <b>Sweep Width (Hz)</b>      | 6009.62              |

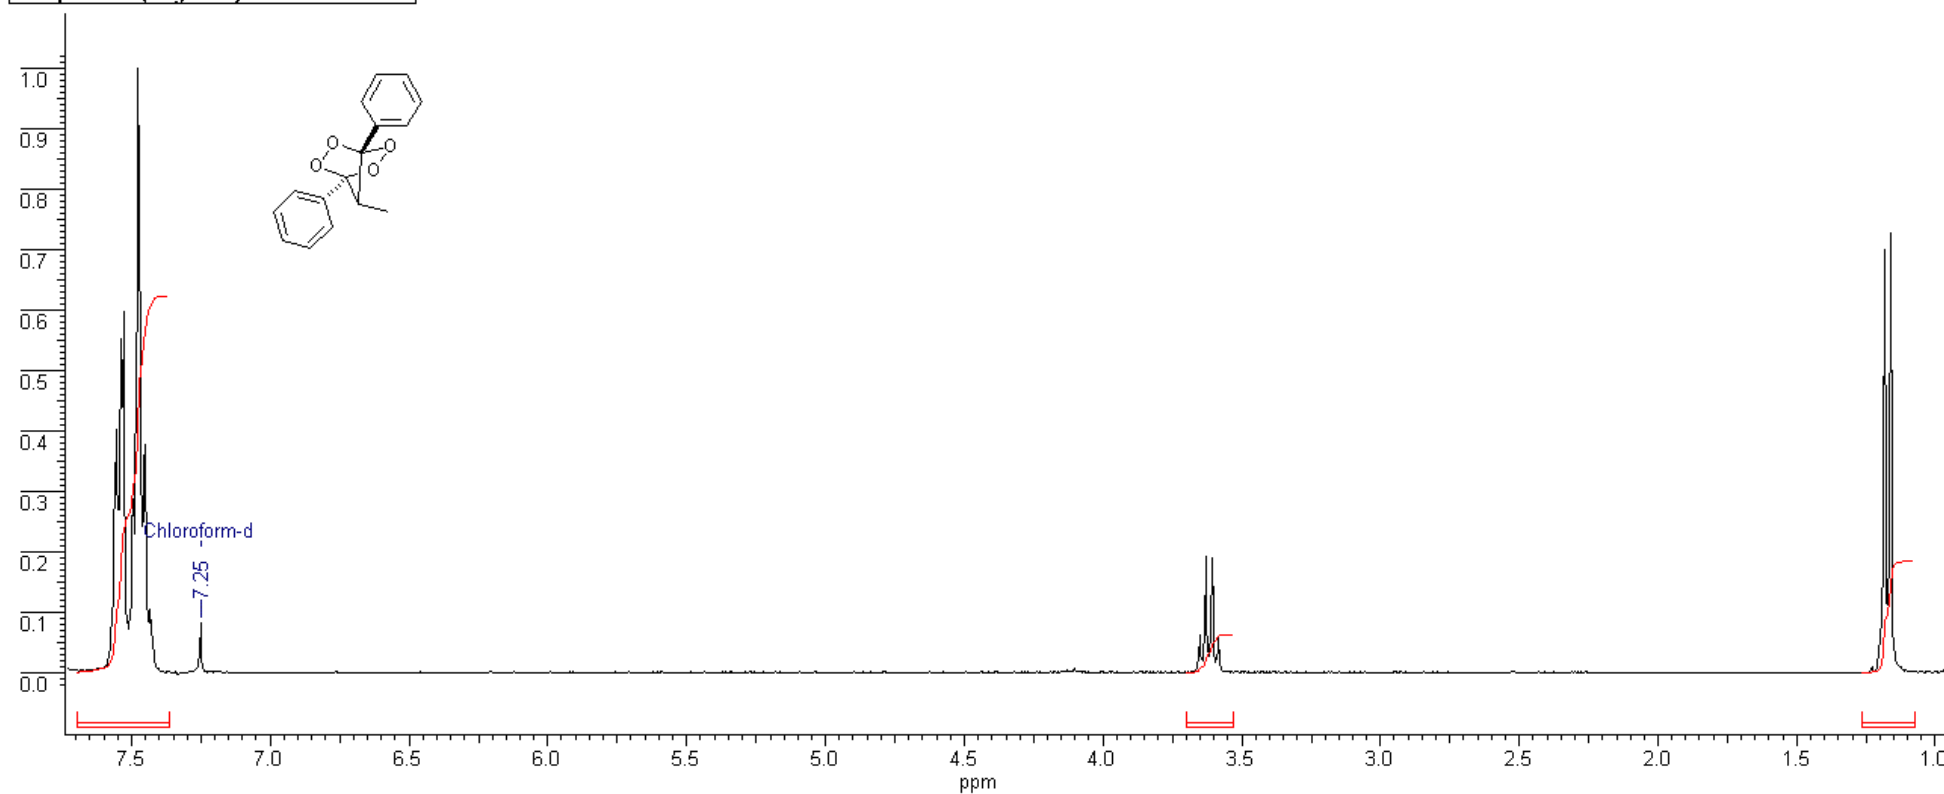

| No. | Annotation   | (ppm) |
|-----|--------------|-------|
| 1   | Chloroform-d | 7.25  |

# 1,4-Diphenyl-7-methyl-2,3,5,6-tetraoxabicyclo[2.2.1]heptane (2q)

|                               |             |                             |                         |                              |                      |
|-------------------------------|-------------|-----------------------------|-------------------------|------------------------------|----------------------|
| <b>Acquisition Time (sec)</b> | 0.9002      | <b>Comment</b>              | Avance-300, C-13, CDCl3 | <b>Date</b>                  | 19 Jul 2012 14:09:04 |
| <b>File Name</b>              |             |                             |                         | <b>Frequency (MHz)</b>       | 75.48                |
| <b>Nucleus</b>                | 13C         | <b>Number of Transients</b> | 226                     | <b>Original Points Count</b> | 16308                |
| <b>Pulse Sequence</b>         | zgpg30 base | <b>Solvent</b>              | CHLOROFORM-D            | <b>Points Count</b>          | 16384                |
| <b>Temperature (degree C)</b> | 27.600      |                             |                         | <b>Sweep Width (Hz)</b>      | 18115.94             |

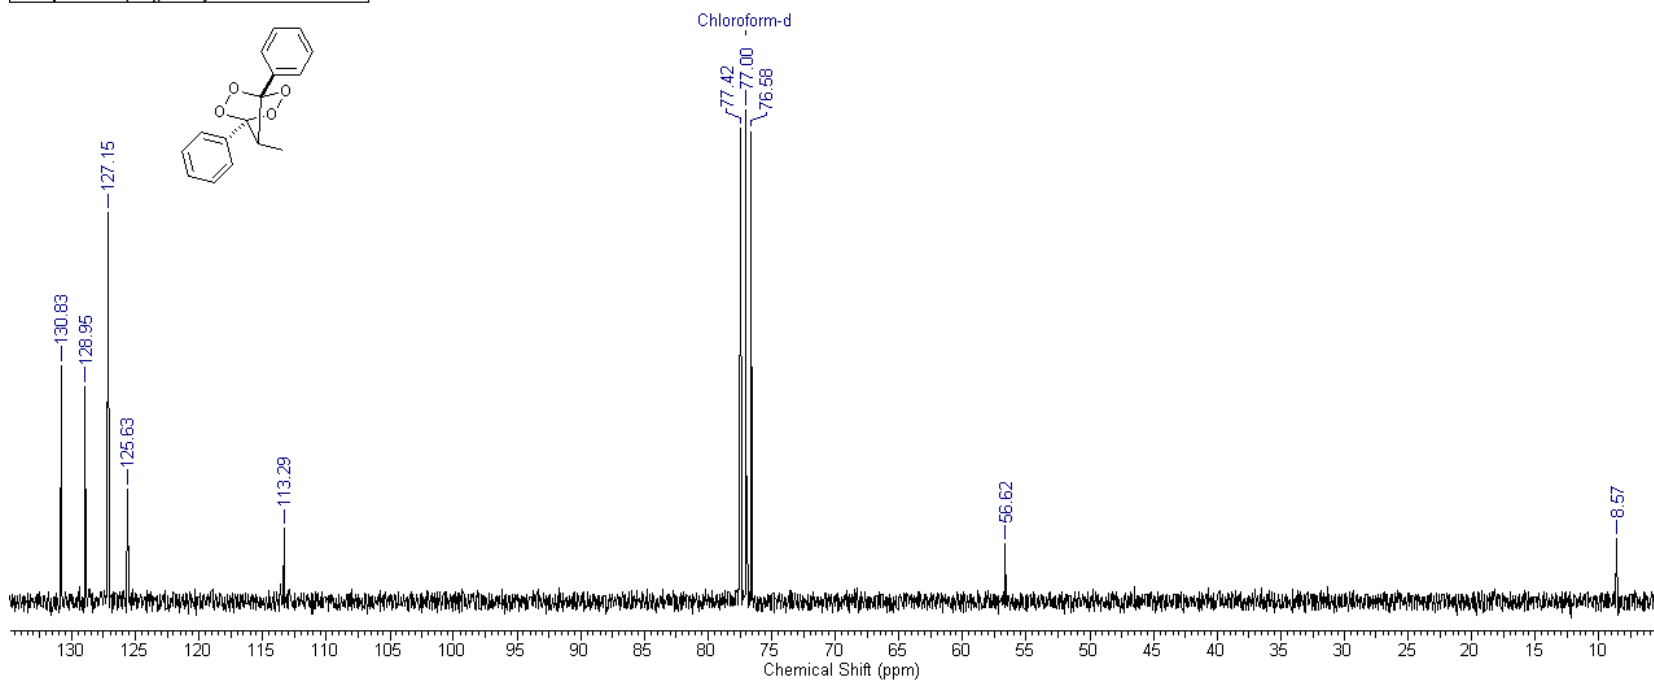

| No. | (ppm)  | (Hz)   | Height |
|-----|--------|--------|--------|
| 1   | 8.57   | 646.6  | 0.1273 |
| 2   | 56.62  | 4273.5 | 0.1169 |
| 3   | 76.58  | 5779.6 | 0.9565 |
| 4   | 77.00  | 5811.7 | 1.0000 |
| 5   | 77.42  | 5843.7 | 0.9634 |
| 6   | 113.29 | 8550.7 | 0.1487 |
| 7   | 125.63 | 9481.7 | 0.2292 |
| 8   | 127.15 | 9596.7 | 0.7896 |
| 9   | 128.95 | 9732.7 | 0.4370 |
| 10  | 130.83 | 9874.3 | 0.4798 |

| No. | Annotation   | (ppm) |
|-----|--------------|-------|
| 1   | Chloroform-d | 77.00 |

### 7-Benzyl-1,4-diphenyl-2,3,5,6-tetraoxabicyclo[2.2.1]heptane (2r)

|                               |                |                             |              |                              |                                 |
|-------------------------------|----------------|-----------------------------|--------------|------------------------------|---------------------------------|
| <b>Acquisition Time (sec)</b> | 0.6759         | <b>Comment</b>              | AGOR NH0023  | <b>Date</b>                  | 30 Jul 2012 09:44:32            |
| <b>File Name</b>              |                |                             |              | <b>Frequency (MHz)</b>       | 300.13                          |
| <b>Nucleus</b>                | <sup>1</sup> H | <b>Number of Transients</b> | 1            | <b>Original Points Count</b> | 8124                            |
| <b>Pulse Sequence</b>         | zg             | <b>Solvent</b>              | CHLOROFORM-D | <b>Points Count</b>          | 8192                            |
| <b>Temperature (degree C)</b> | 27.000         |                             |              |                              | <b>Sweep Width (Hz)</b> 6009.62 |

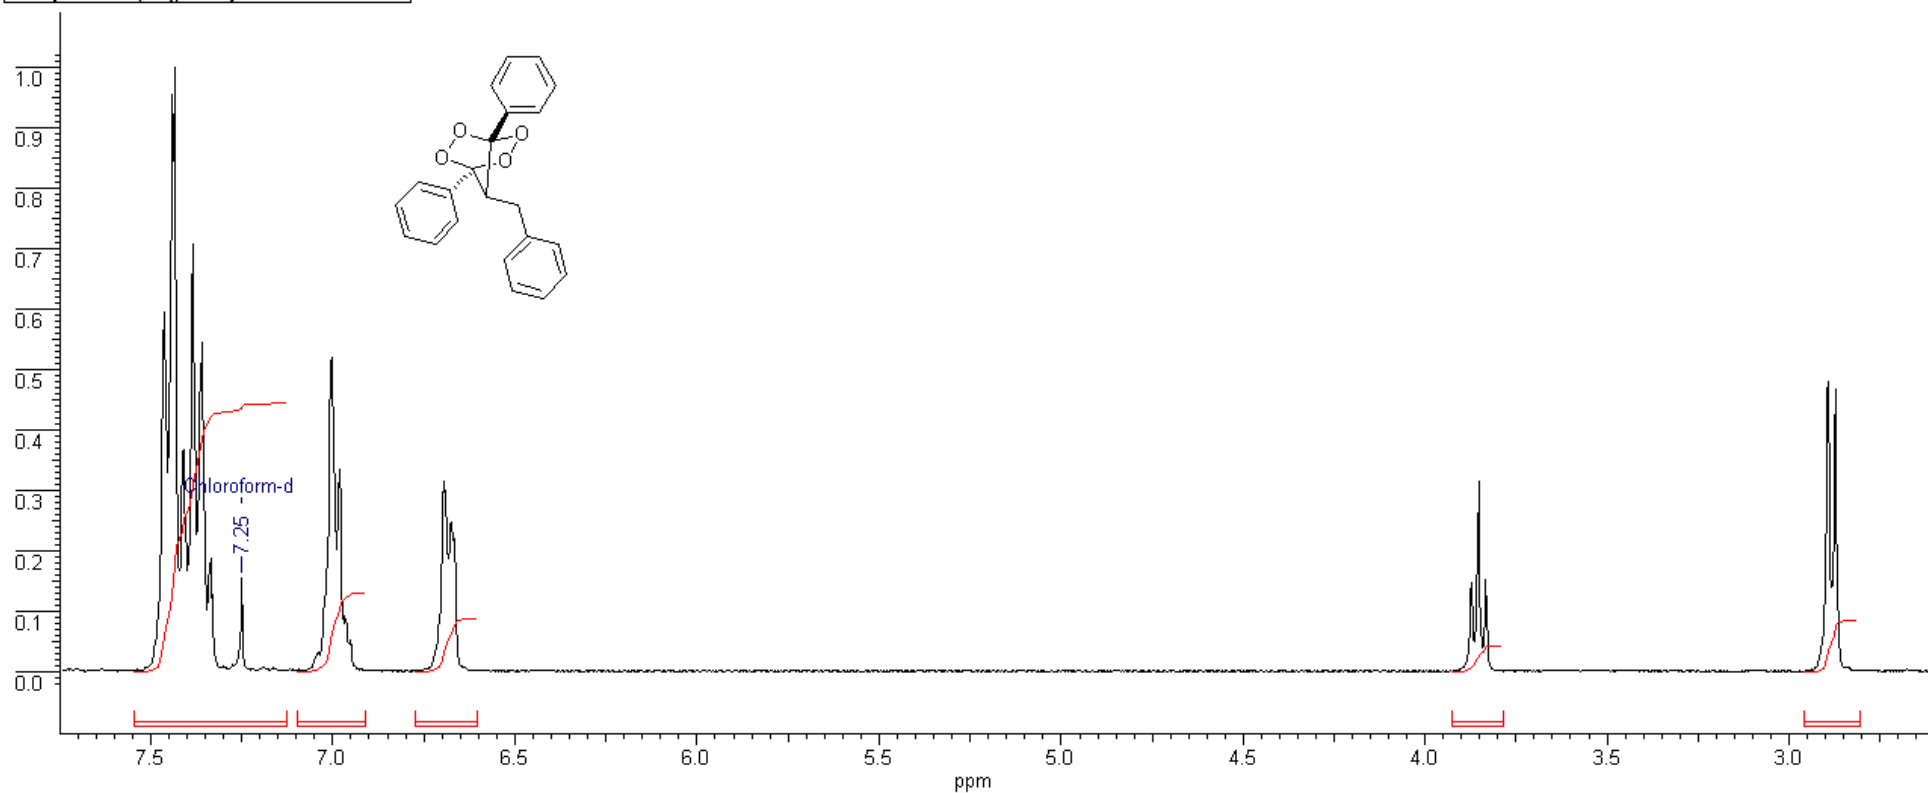

| No. | Annotation   | (ppm) |
|-----|--------------|-------|
| 1   | Chloroform-d | 7.25  |

7-Benzyl-1,4-diphenyl-2,3,5,6-tetraoxabicyclo[2.2.1]heptane (2r)

|                        |            |                      |                         |                       |                      |
|------------------------|------------|----------------------|-------------------------|-----------------------|----------------------|
| Acquisition Time (sec) | 0.4501     | Comment              | Avance-300, C-13, CDCl3 | Date                  | 30 Jul 2012 09:50:56 |
| File Name              |            |                      |                         | Frequency (MHz)       | 75.48                |
| Nucleus                | 13C        | Number of Transients | 367                     | Original Points Count | 16308                |
| Pulse Sequence         | zgpg30base | Solvent              | CHLOROFORM-D            | Points Count          | 16384                |
| Temperature (degree C) | 28.000     |                      |                         | Sweep Width (Hz)      | 18115.94             |

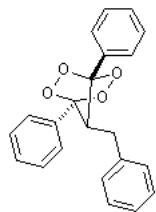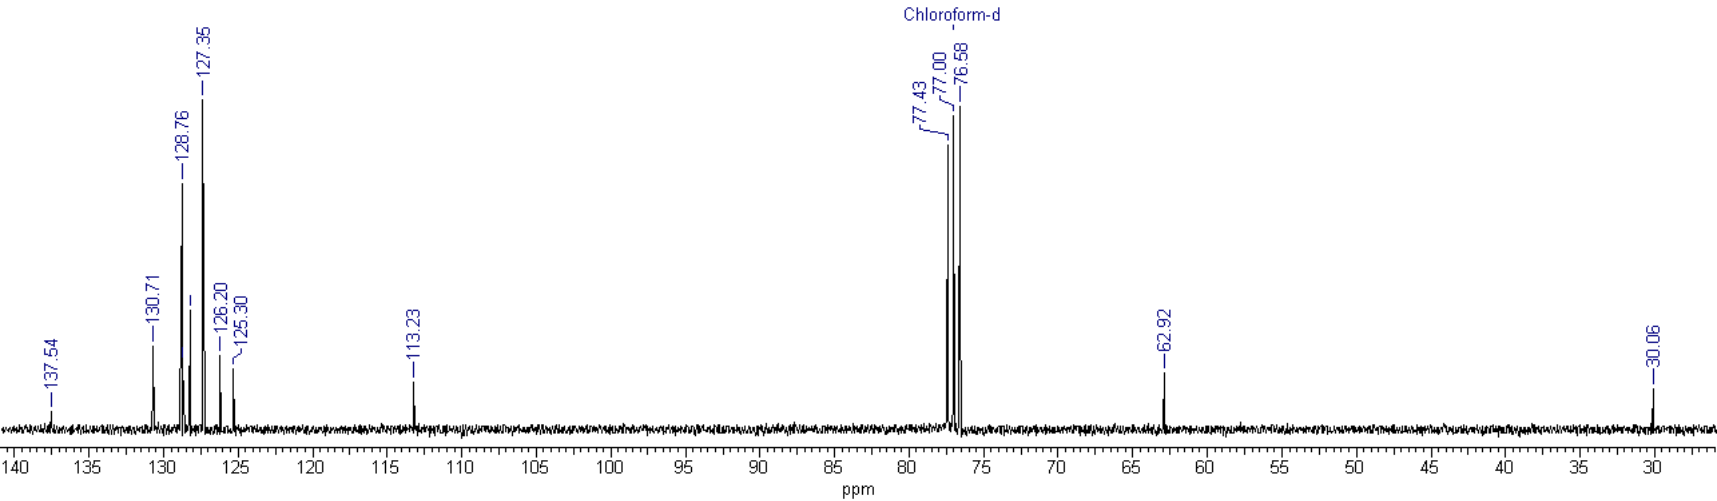

| No. | (ppm)  | (Hz)   | Height | No. | (ppm)  | (Hz)    | Height | No. | Annotation   | (ppm) |
|-----|--------|--------|--------|-----|--------|---------|--------|-----|--------------|-------|
| 1   | 30.06  | 2268.8 | 0.1239 | 8   | 126.20 | 9524.9  | 0.2227 | 1   | Chloroform-d | 77.00 |
| 2   | 62.92  | 4749.0 | 0.1710 | 9   | 127.35 | 9612.2  | 1.0000 |     |              |       |
| 3   | 76.58  | 5779.6 | 0.9821 | 10  | 128.19 | 9675.3  | 0.3617 |     |              |       |
| 4   | 77.00  | 5811.7 | 0.9541 | 11  | 128.69 | 9712.9  | 0.2052 |     |              |       |
| 5   | 77.43  | 5843.7 | 0.8646 | 12  | 128.76 | 9718.4  | 0.7473 |     |              |       |
| 6   | 113.23 | 8546.3 | 0.1461 | 13  | 130.71 | 9865.5  | 0.2547 |     |              |       |
| 7   | 125.30 | 9457.4 | 0.1844 | 14  | 137.54 | 10380.7 | 0.0528 |     |              |       |



## HRMS of $\beta$ -diketone

### 3-(1-Adamantyl)-6-methylheptane-2,4-dione (1j)

#### Display Report

##### Analysis Info

Analysis Name D:\Data\Chizhov\Nikishin\Terentiev\Yaremenko\b-426\_low.d  
Method tune\_low.m  
Sample Name /TERN B-426  
Comment CH<sub>3</sub>CN 100 %, dil. 200, no calibrant added

Acquisition Date 6/4/2012 4:21:43 PM

Operator BDAL@DE  
Instrument / Ser# micrOTOF 10248

##### Acquisition Parameter

|             |            |                      |          |                  |           |
|-------------|------------|----------------------|----------|------------------|-----------|
| Source Type | ESI        | Ion Polarity         | Positive | Set Nebulizer    | 0.4 Bar   |
| Focus       | Not active |                      |          | Set Dry Heater   | 180 °C    |
| Scan Begin  | 50 m/z     | Set Capillary        | 4500 V   | Set Dry Gas      | 4.0 l/min |
| Scan End    | 3000 m/z   | Set End Plate Offset | -500 V   | Set Divert Valve | Waste     |

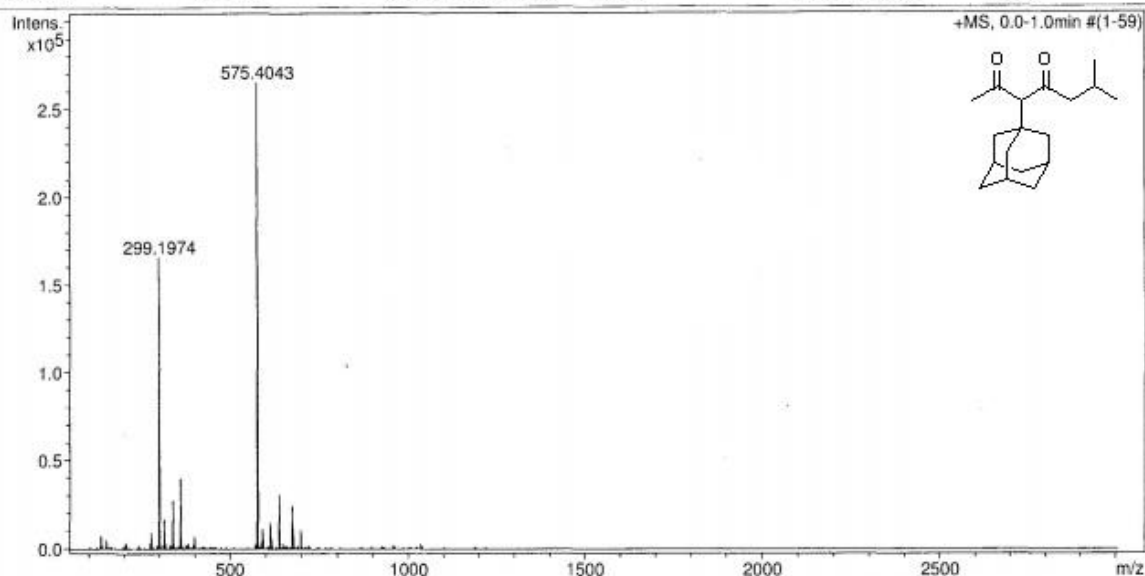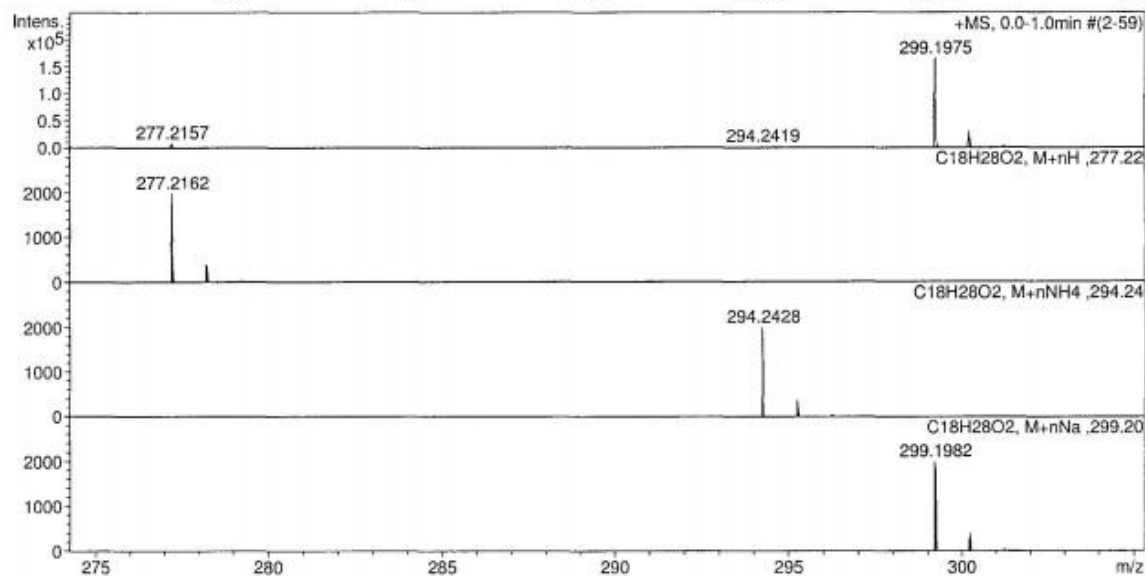

## HRMS of tetraoxanes

### 1,4-Dimethyl-2,3,5,6-tetraoxabicyclo[2.2.1]heptane (2a)

#### Display Report

##### Analysis Info

Analysis Name D:\Data\Chizhov\Nikishin\Terentiev\Yaremenko\bb201&cblow.d  
Method tune\_low.m  
Sample Name /TERN BB201  
Comment CH3CN 100 %, dil. > 1, calibrant added

Acquisition Date 5/11/2012 2:57:00 PM

Operator BDAL@DE

Instrument / Ser# micrOTOF 10248

##### Acquisition Parameter

|             |            |                      |          |                  |           |
|-------------|------------|----------------------|----------|------------------|-----------|
| Source Type | ESI        | Ion Polarity         | Positive | Set Nebulizer    | 0.4 Bar   |
| Focus       | Not active |                      |          | Set Dry Heater   | 180 °C    |
| Scan Begin  | 50 m/z     | Set Capillary        | 4500 V   | Set Dry Gas      | 4.0 l/min |
| Scan End    | 3000 m/z   | Set End Plate Offset | -500 V   | Set Divert Valve | Waste     |

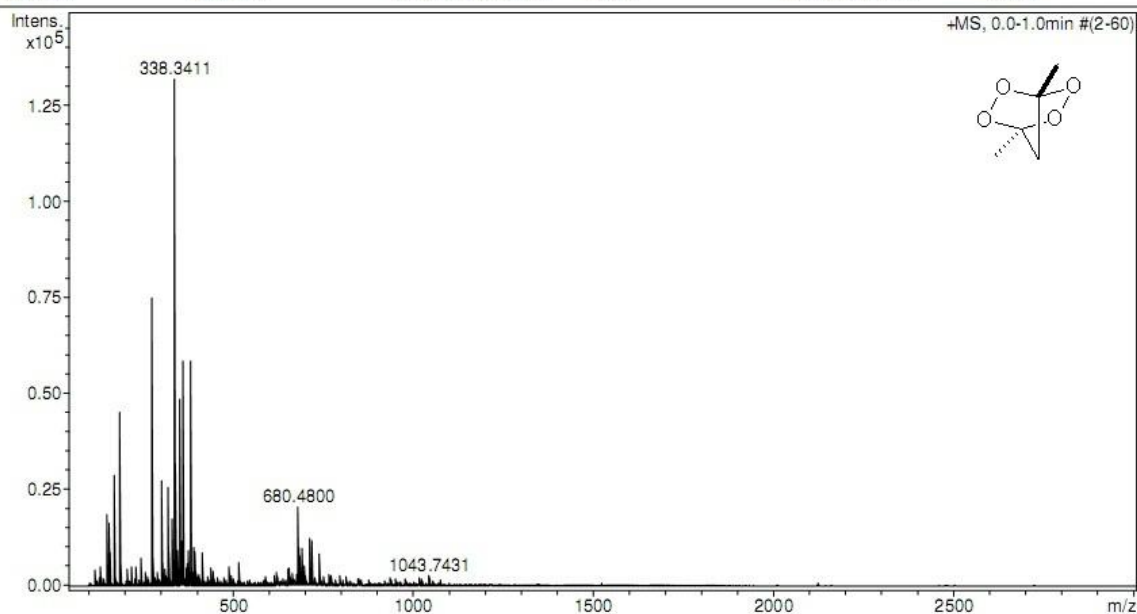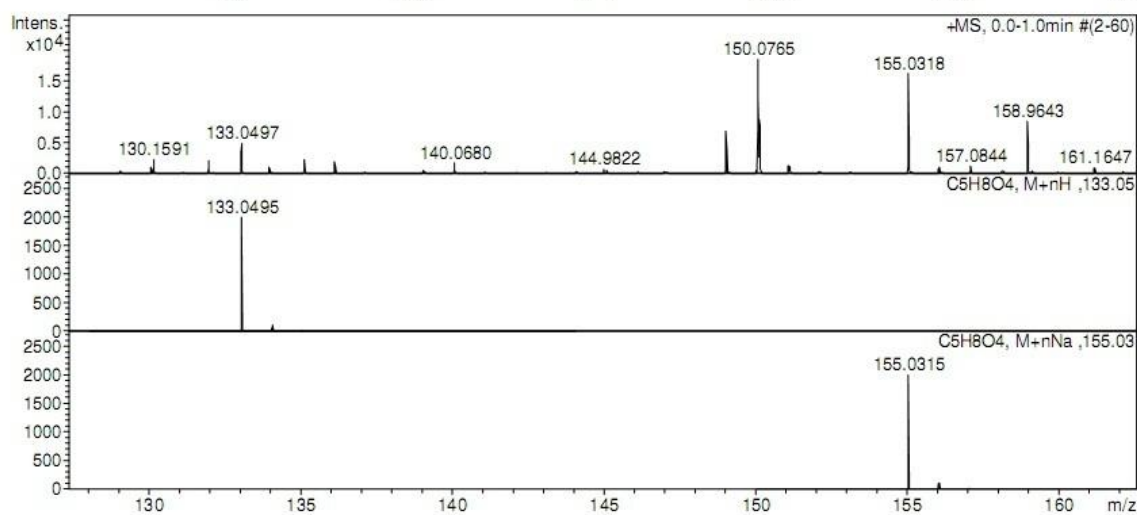

# 1-Isobutyl-4-methyl-2,3,5,6-tetraoxabicyclo[2.2.1]heptane (2b)

## Display Report

### Analysis Info

Analysis Name D:\Data\Chizhov\Nikishin\Terentiev\Yaremenko\b419\_&clb\low.d  
Method tune\_low.m  
Sample Name /TERN B-419  
Comment CH3CN 100 %, dil. 200, calibrant added

Acquisition Date 4/23/2012 5:16:47 PM

Operator BDAL@DE  
Instrument / Ser# micrOTOF 10248

### Acquisition Parameter

|             |            |                      |          |                  |           |
|-------------|------------|----------------------|----------|------------------|-----------|
| Source Type | ESI        | Ion Polarity         | Positive | Set Nebulizer    | 0.4 Bar   |
| Focus       | Not active |                      |          | Set Dry Heater   | 180 °C    |
| Scan Begin  | 50 m/z     | Set Capillary        | 4500 V   | Set Dry Gas      | 4.0 l/min |
| Scan End    | 3000 m/z   | Set End Plate Offset | -500 V   | Set Divert Valve | Waste     |

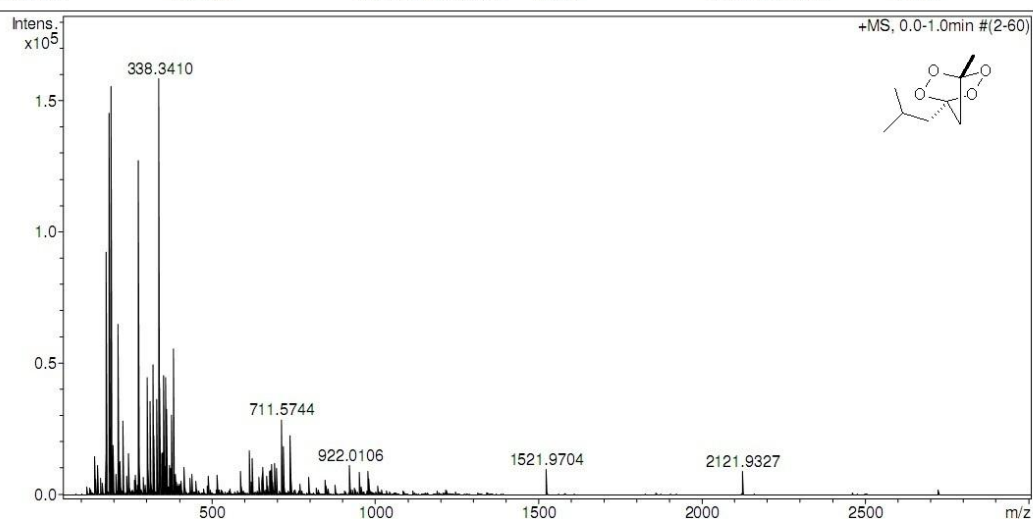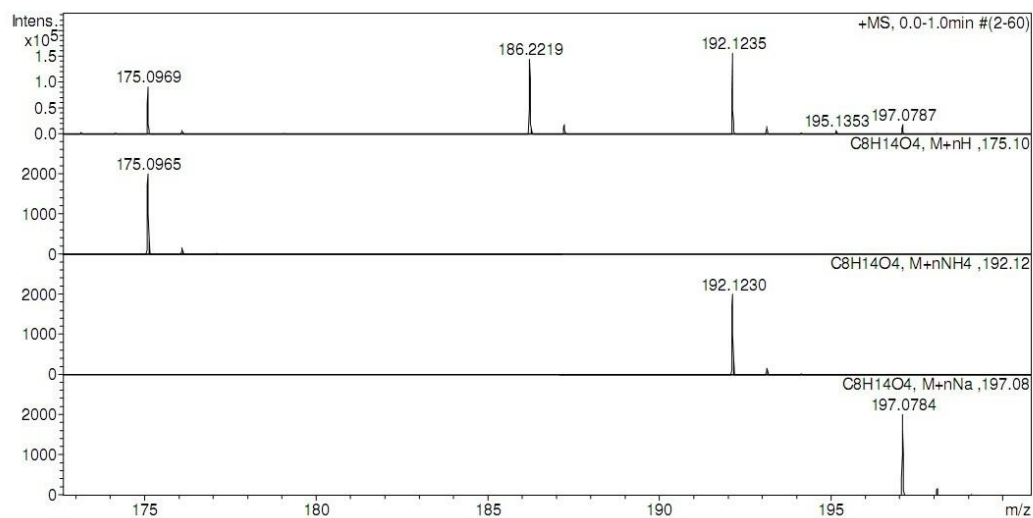

# 1-Ethyl-4-isobutyl-2,3,5,6-tetraoxabicyclo[2.2.1]heptane (2c)

## Display Report

### Analysis Info

|               |                                                              |                   |                      |
|---------------|--------------------------------------------------------------|-------------------|----------------------|
| Analysis Name | D:\Data\Chizhov\Nikishin\Terentiev\Yaremenko\bb204_&clblow.d | Acquisition Date  | 5/11/2012 3:38:04 PM |
| Method        | tune_low.m                                                   | Operator          | BDAL@DE              |
| Sample Name   | /TERN BB204                                                  | Instrument / Ser# | micrOTOF 10248       |
| Comment       | CH3CN 100 %, dil. 200, calibrant added                       |                   |                      |

### Acquisition Parameter

|             |            |                      |          |                  |           |
|-------------|------------|----------------------|----------|------------------|-----------|
| Source Type | ESI        | Ion Polarity         | Positive | Set Nebulizer    | 0.4 Bar   |
| Focus       | Not active |                      |          | Set Dry Heater   | 180 °C    |
| Scan Begin  | 50 m/z     | Set Capillary        | 4500 V   | Set Dry Gas      | 4.0 l/min |
| Scan End    | 3000 m/z   | Set End Plate Offset | -500 V   | Set Divert Valve | Waste     |

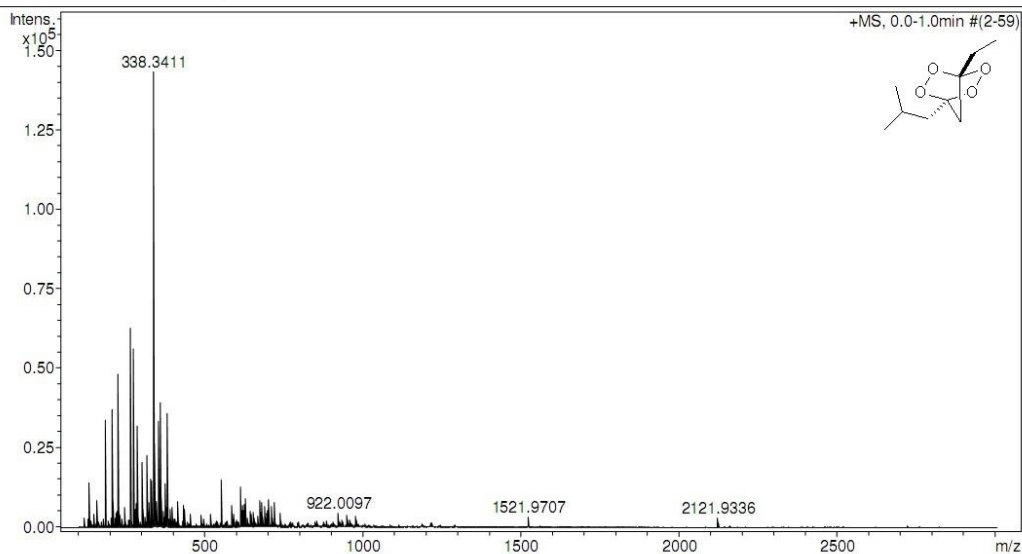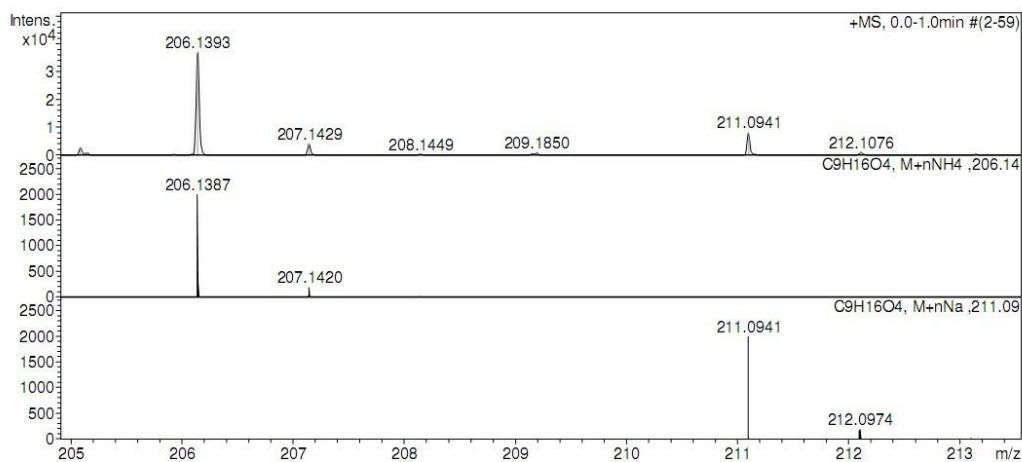

# 1,4-Di-*tert*-butyl-2,3,5,6-tetraoxabicyclo[2.2.1]heptane (2d)

## Display Report

|                      |                                                              |                   |                      |
|----------------------|--------------------------------------------------------------|-------------------|----------------------|
| <b>Analysis Info</b> |                                                              | Acquisition Date  | 6/18/2012 5:41:58 PM |
| Analysis Name        | D:\Data\Chizhov\Nikishin\Terentiev\Yaremenko\bb-226&clblow.d | Operator          | BDAL@DE              |
| Method               | tune_low.m                                                   | Instrument / Ser# | micrOTOF 10248       |
| Sample Name          | /TERN BB-226                                                 |                   |                      |
| Comment              | CH3CN 100 %, dil. 2, calibrant added                         |                   |                      |

|                              |            |                      |          |                  |           |
|------------------------------|------------|----------------------|----------|------------------|-----------|
| <b>Acquisition Parameter</b> |            | Ion Polarity         | Positive | Set Nebulizer    | 0.4 Bar   |
| Source Type                  | ESI        |                      |          | Set Dry Heater   | 180 °C    |
| Focus                        | Not active |                      |          | Set Dry Gas      | 4.0 l/min |
| Scan Begin                   | 50 m/z     | Set Capillary        | 4500 V   | Set Divert Valve | Waste     |
| Scan End                     | 3000 m/z   | Set End Plate Offset | -500 V   |                  |           |

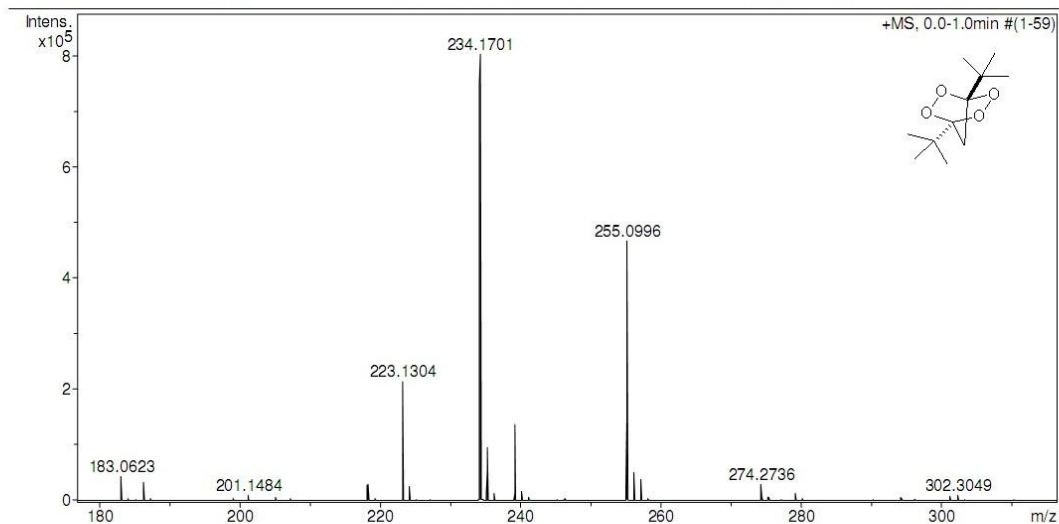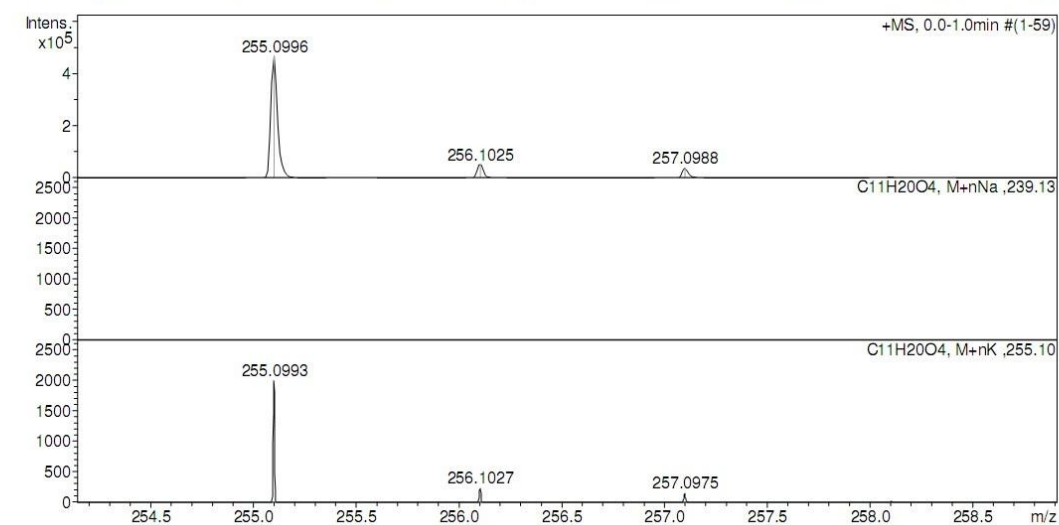

# 1-(1-Adamantyl)-4-methyl-2,3,5,6-tetraoxabicyclo[2.2.1]heptane (2e)

## Display Report

### Analysis Info

Analysis Name D:\Data\Chizhov\Nikishin\Terentiev\b364&clb\$low.d  
Method tune\_low.m  
Sample Name /TERN B-364  
Comment CH3CN 100 %, dil. 2, calibrant added

Acquisition Date 1/16/2012 11:22:44 AM

Operator BDAL@DE  
Instrument / Ser# micrOTOF 10248

### Acquisition Parameter

|             |            |                      |          |                  |           |
|-------------|------------|----------------------|----------|------------------|-----------|
| Source Type | ESI        | Ion Polarity         | Positive | Set Nebulizer    | 0.4 Bar   |
| Focus       | Not active |                      |          | Set Dry Heater   | 180 °C    |
| Scan Begin  | 50 m/z     | Set Capillary        | 4500 V   | Set Dry Gas      | 4.0 l/min |
| Scan End    | 3000 m/z   | Set End Plate Offset | -500 V   | Set Divert Valve | Waste     |

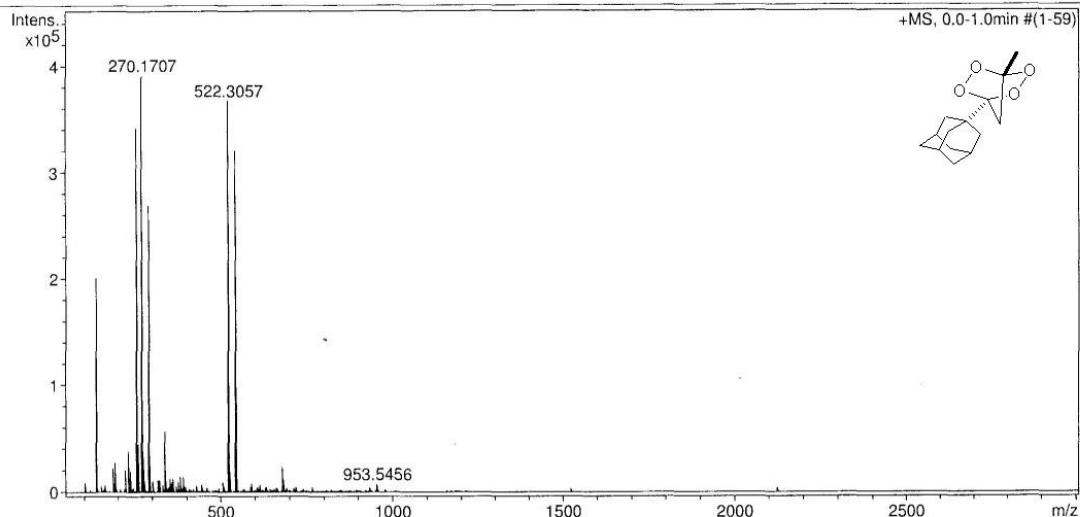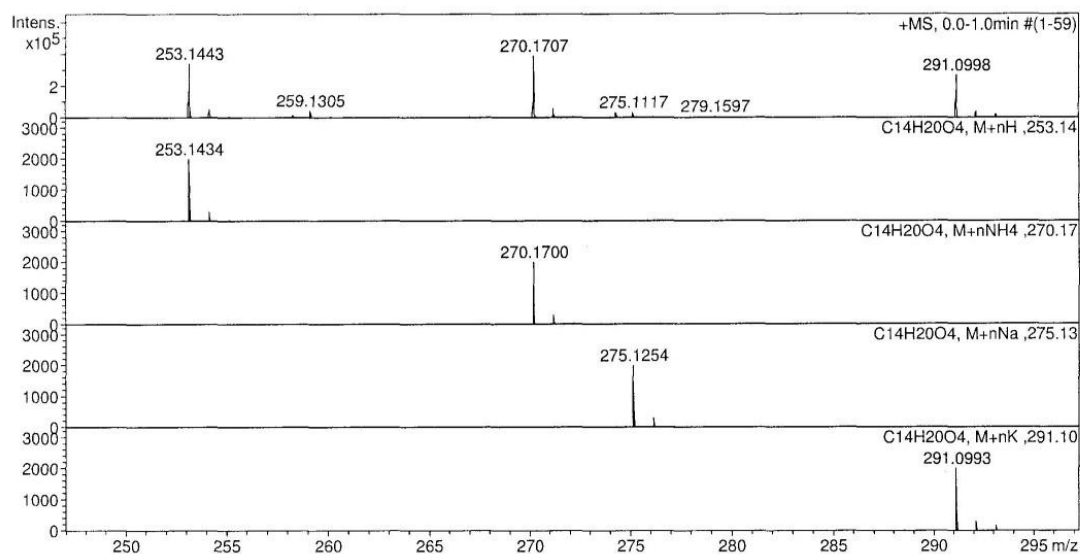



# 1-(1-Adamantyl)-4-ethyl-2,3,5,6-tetraoxabicyclo[2.2.1]heptane (2f)

## Display Report

### Analysis Info

|               |                                                               |                   |                      |
|---------------|---------------------------------------------------------------|-------------------|----------------------|
| Analysis Name | D:\Data\Chizhov\Nikishin\Terentiev\Yaremenko\bb-149_&clblow.d | Acquisition Date  | 5/21/2012 2:43:07 PM |
| Method        | tune_low.m                                                    | Operator          | BDAL@DE              |
| Sample Name   | /TERN BB-149                                                  | Instrument / Ser# | micrOTOF 10248       |
| Comment       | CH3CN 100 %, dil. 200, calibrant added                        |                   |                      |

### Acquisition Parameter

|             |            |                      |          |                  |           |
|-------------|------------|----------------------|----------|------------------|-----------|
| Source Type | ESI        | Ion Polarity         | Positive | Set Nebulizer    | 0.4 Bar   |
| Focus       | Not active |                      |          | Set Dry Heater   | 180 °C    |
| Scan Begin  | 50 m/z     | Set Capillary        | 4500 V   | Set Dry Gas      | 4.0 l/min |
| Scan End    | 3000 m/z   | Set End Plate Offset | -500 V   | Set Divert Valve | Waste     |

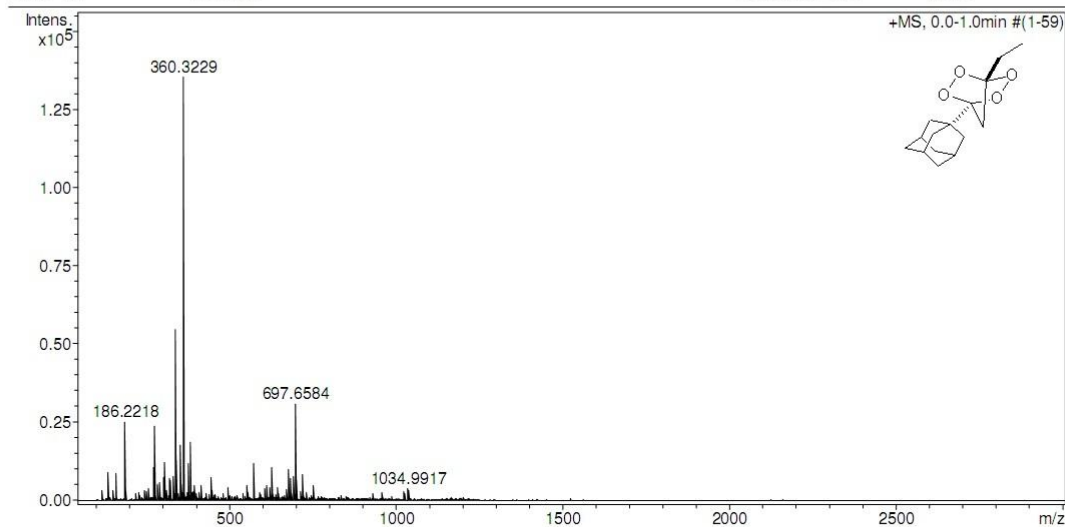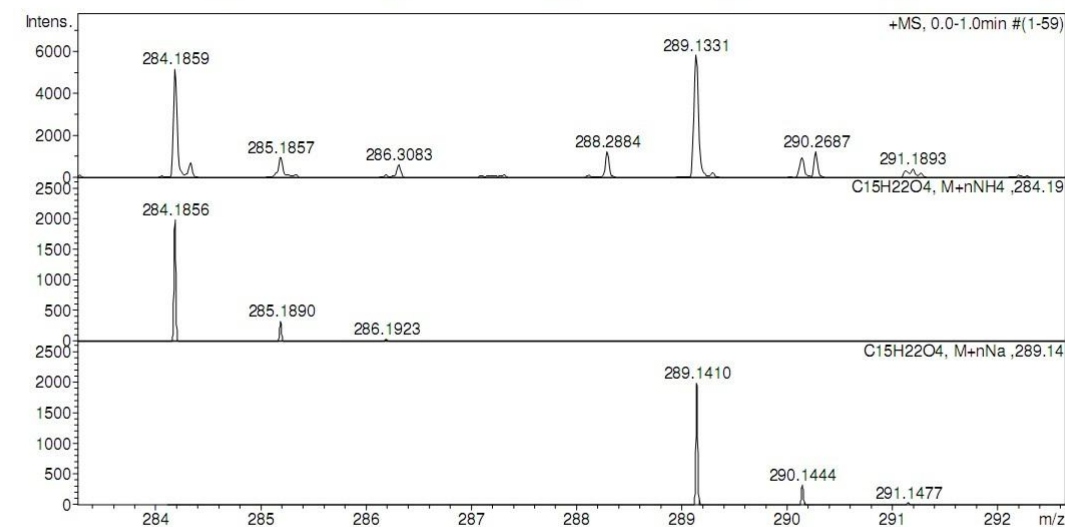

# 1,4-Dimethyl-7-hexyl-2,3,5,6-tetraoxabicyclo[2.2.1]heptane (2g)

## Display Report

|                      |                                                              |                   |                      |
|----------------------|--------------------------------------------------------------|-------------------|----------------------|
| <b>Analysis Info</b> |                                                              | Acquisition Date  | 5/25/2012 4:55:49 PM |
| Analysis Name        | D:\Data\Chizhov\Nikishin\Terentiev\Yaremenko\bb207_&clblow.d | Operator          | BDAL@DE              |
| Method               | tune_low.m                                                   | Instrument / Ser# | micrOTOF 10248       |
| Sample Name          | /TERN BB207                                                  |                   |                      |
| Comment              | CH3CN 100 %, dil. 200, calibrant added                       |                   |                      |

### Acquisition Parameter

|             |            |                      |          |                  |           |
|-------------|------------|----------------------|----------|------------------|-----------|
| Source Type | ESI        | Ion Polarity         | Positive | Set Nebulizer    | 0.4 Bar   |
| Focus       | Not active |                      |          | Set Dry Heater   | 180 °C    |
| Scan Begin  | 50 m/z     | Set Capillary        | 4500 V   | Set Dry Gas      | 4.0 l/min |
| Scan End    | 3000 m/z   | Set End Plate Offset | -500 V   | Set Divert Valve | Waste     |

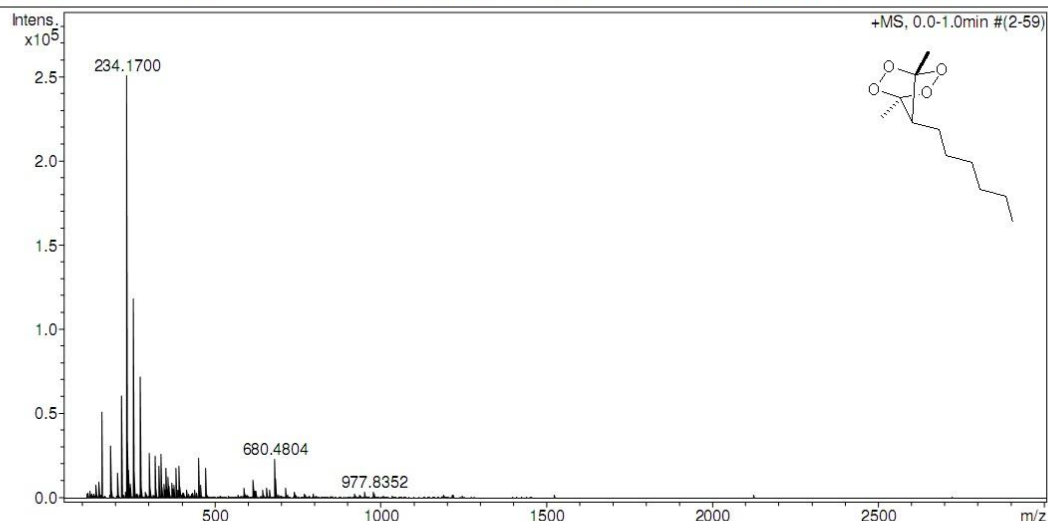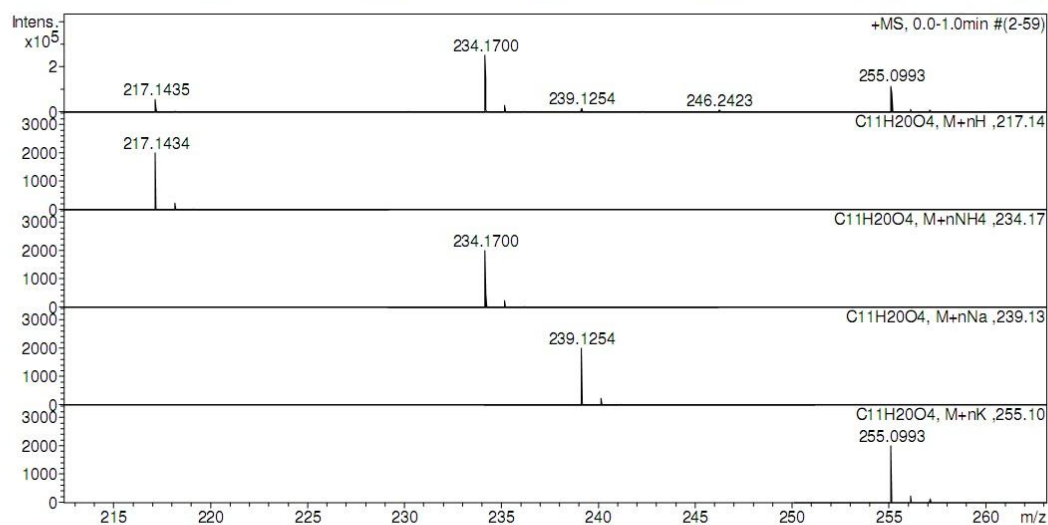



# 7-(1-Adamantyl)-1-isobutyl-4-methyl-2,3,5,6-tetraoxabicyclo[2.2.1]heptane (2j)

## Display Report

### Analysis Info

Analysis Name D:\Data\Chizhov\Nikishin\Terentiev\Yaremenko\bb-208low.d  
Method tune\_low.m  
Sample Name /TERN BB-208  
Comment CH<sub>3</sub>CN 100 %, dil. 1, no calibrant added

Acquisition Date 6/4/2012 3:10:53 PM

Operator BDAL@DE  
Instrument / Ser# micrOTOF 10248

### Acquisition Parameter

|             |            |                      |          |                  |           |
|-------------|------------|----------------------|----------|------------------|-----------|
| Source Type | ESI        | Ion Polarity         | Positive | Set Nebulizer    | 0.4 Bar   |
| Focus       | Not active |                      |          | Set Dry Heater   | 180 °C    |
| Scan Begin  | 50 m/z     | Set Capillary        | 4500 V   | Set Dry Gas      | 4.0 l/min |
| Scan End    | 3000 m/z   | Set End Plate Offset | -500 V   | Set Divert Valve | Waste     |

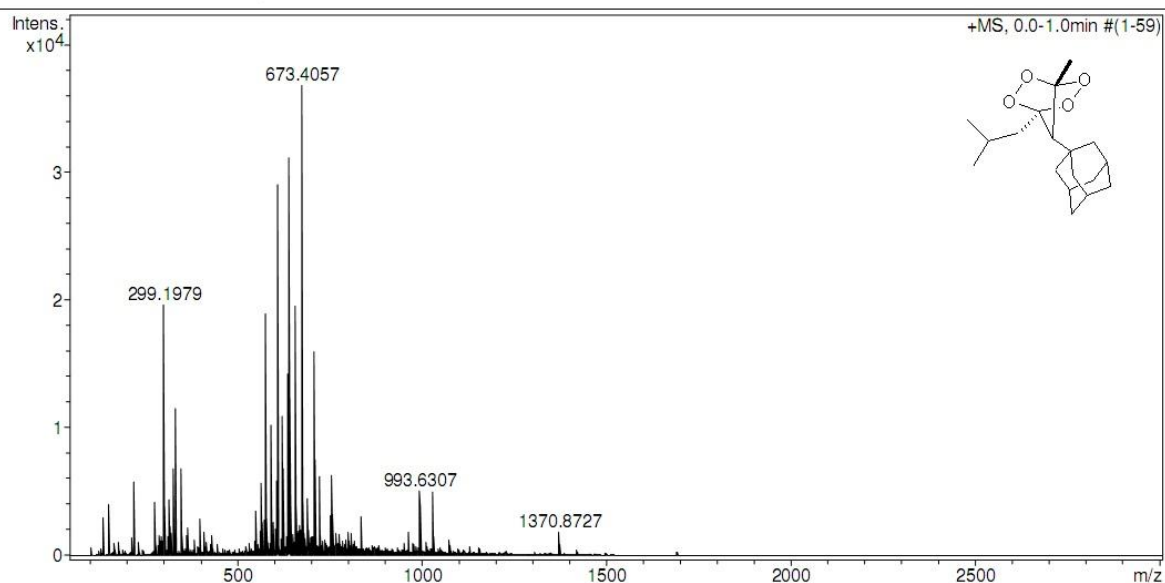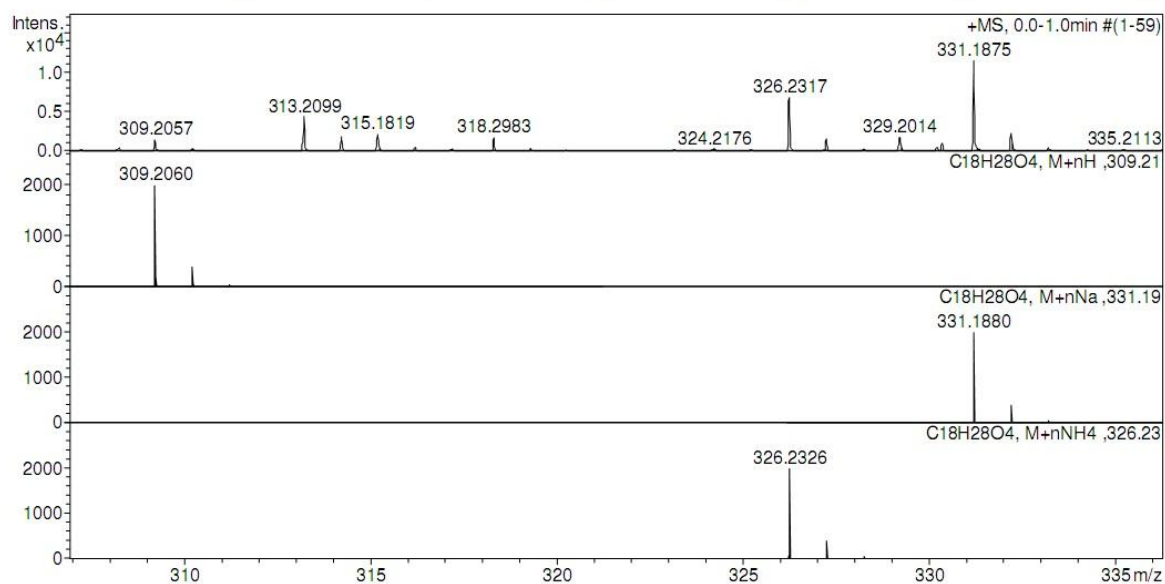

# 1,4-Dimethyl-7-(1-phenylethyl)-2,3,5,6-tetraoxabicyclo[2.2.1]heptane (2l)

## Display Report

### Analysis Info

Analysis Name D:\Data\Chizhov\Nikishin\Terentiev\Yaremenko\b416\_&clblow.d  
Method tune\_low.m  
Sample Name /TERN B-416  
Comment CH3CN 100 %, dil. 200, calibrant added

Acquisition Date 4/23/2012 4:54:42 PM

Operator BDAL@DE  
Instrument / Ser# micrOTOF 10248

### Acquisition Parameter

|             |            |                      |          |                  |           |
|-------------|------------|----------------------|----------|------------------|-----------|
| Source Type | ESI        | Ion Polarity         | Positive | Set Nebulizer    | 0.4 Bar   |
| Focus       | Not active |                      |          | Set Dry Heater   | 180 °C    |
| Scan Begin  | 50 m/z     | Set Capillary        | 4500 V   | Set Dry Gas      | 4.0 l/min |
| Scan End    | 3000 m/z   | Set End Plate Offset | -500 V   | Set Divert Valve | Waste     |

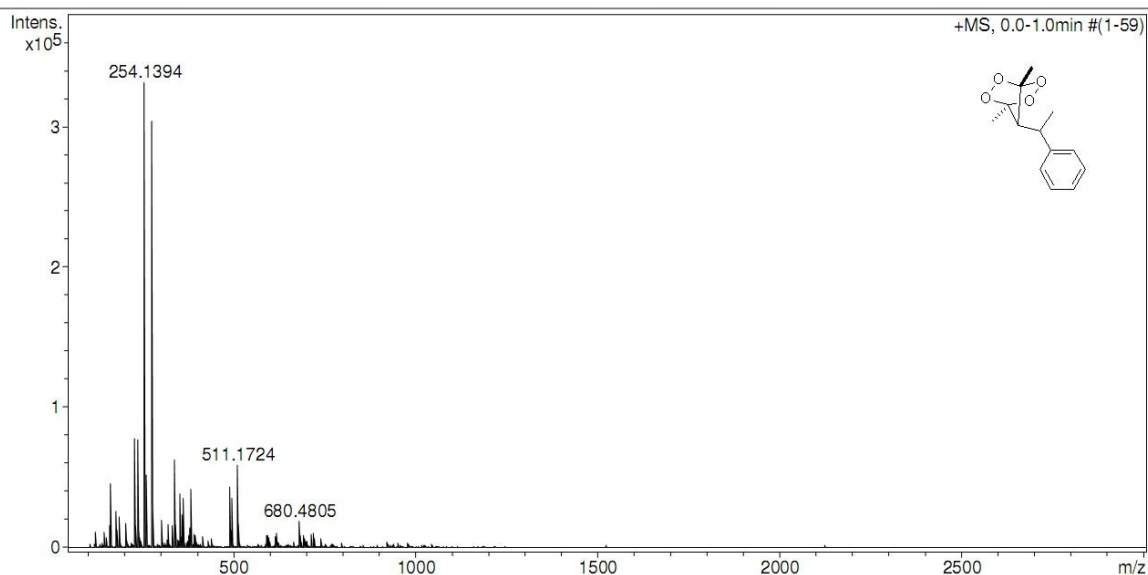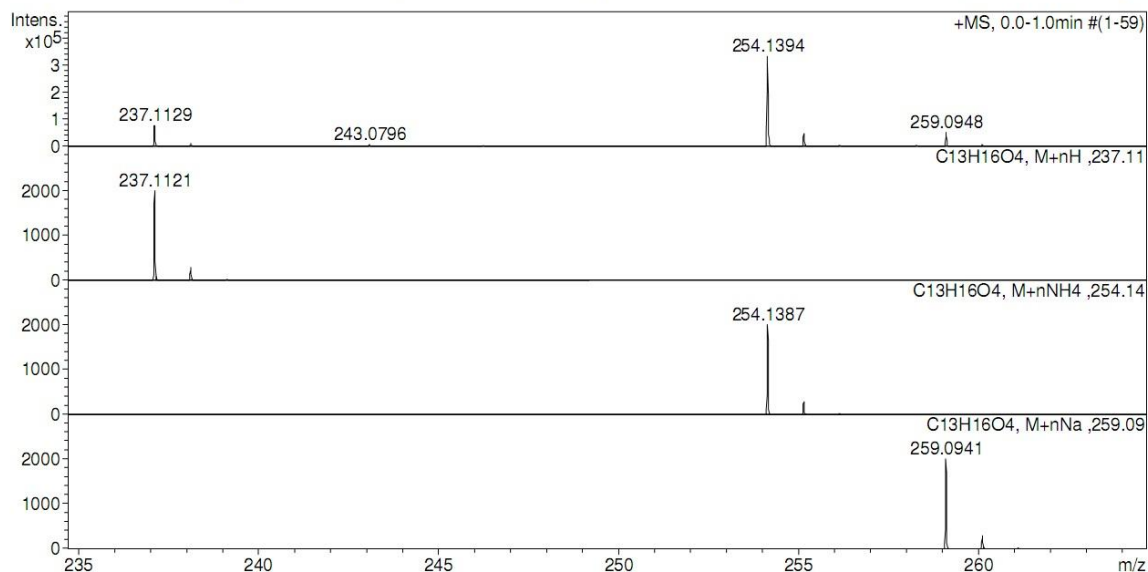

# 1,4-Dimethyl-7-[1-(4-methylphenyl)ethyl]-2,3,5,6-tetraoxabicyclo[2.2.1]heptane (2m)

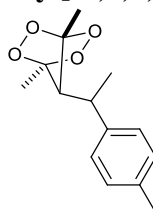

## Display Report

### Analysis Info

Analysis Name D:\Data\Chizhov\Nikishin\Terentiev\Yaremenko\b421\_&clow.d  
Method tune\_low.m  
Sample Name /TERN B-421  
Comment CH3CN 100 %, dil. 200, calibrant added

Acquisition Date 4/23/2012 5:40:14 PM

Operator BDAL@DE  
Instrument / Ser# micrOTOF 10248

### Acquisition Parameter

|             |            |                      |          |                  |           |
|-------------|------------|----------------------|----------|------------------|-----------|
| Source Type | ESI        | Ion Polarity         | Positive | Set Nebulizer    | 0.4 Bar   |
| Focus       | Not active |                      |          | Set Dry Heater   | 180 °C    |
| Scan Begin  | 50 m/z     | Set Capillary        | 4500 V   | Set Dry Gas      | 4.0 l/min |
| Scan End    | 3000 m/z   | Set End Plate Offset | -500 V   | Set Divert Valve | Waste     |

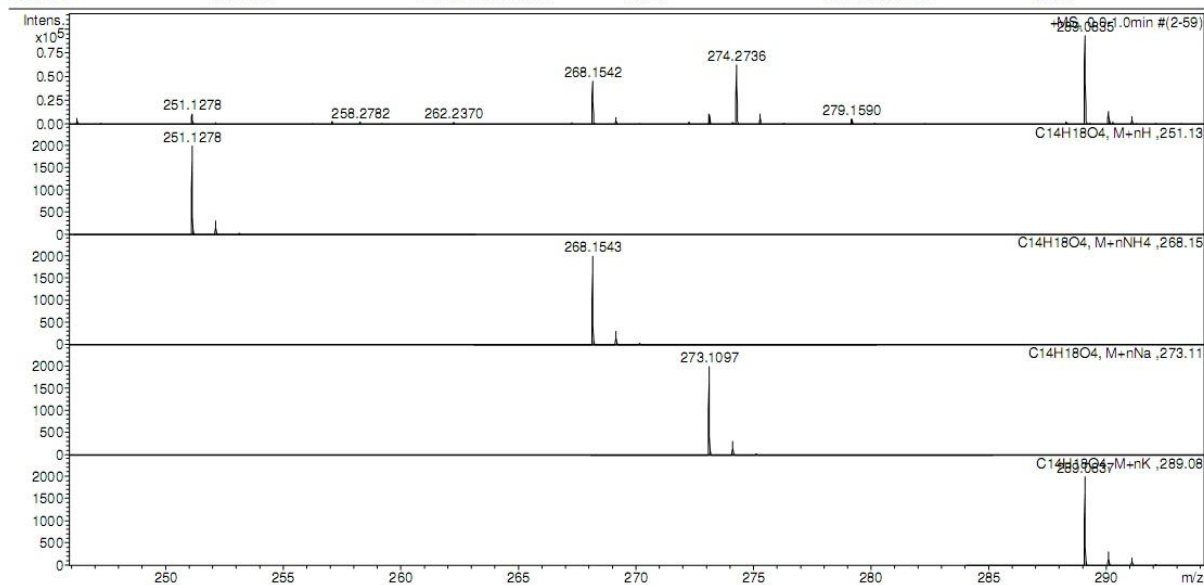

# 7-[1-(4-Bromophenyl)ethyl]-1,4-dimethyl-2,3,5,6-tetraoxabicyclo[2.2.1]heptane (2n)

## Display Report

### Analysis Info

Analysis Name D:\Data\Chizhov\Nikishin\Terentiev\Yaremenko\b423\_low.d  
Method tune\_low.m  
Sample Name /TERN B-423  
Comment CH3CN 100 %, dil. 200, no calibrant added

Acquisition Date 4/23/2012 6:00:25 PM

Operator BDAL@DE  
Instrument / Ser# micrOTOF 10248

### Acquisition Parameter

|             |            |                      |          |                  |           |
|-------------|------------|----------------------|----------|------------------|-----------|
| Source Type | ESI        | Ion Polarity         | Positive | Set Nebulizer    | 0.4 Bar   |
| Focus       | Not active |                      |          | Set Dry Heater   | 180 °C    |
| Scan Begin  | 50 m/z     | Set Capillary        | 4500 V   | Set Dry Gas      | 4.0 l/min |
| Scan End    | 3000 m/z   | Set End Plate Offset | -500 V   | Set Divert Valve | Waste     |

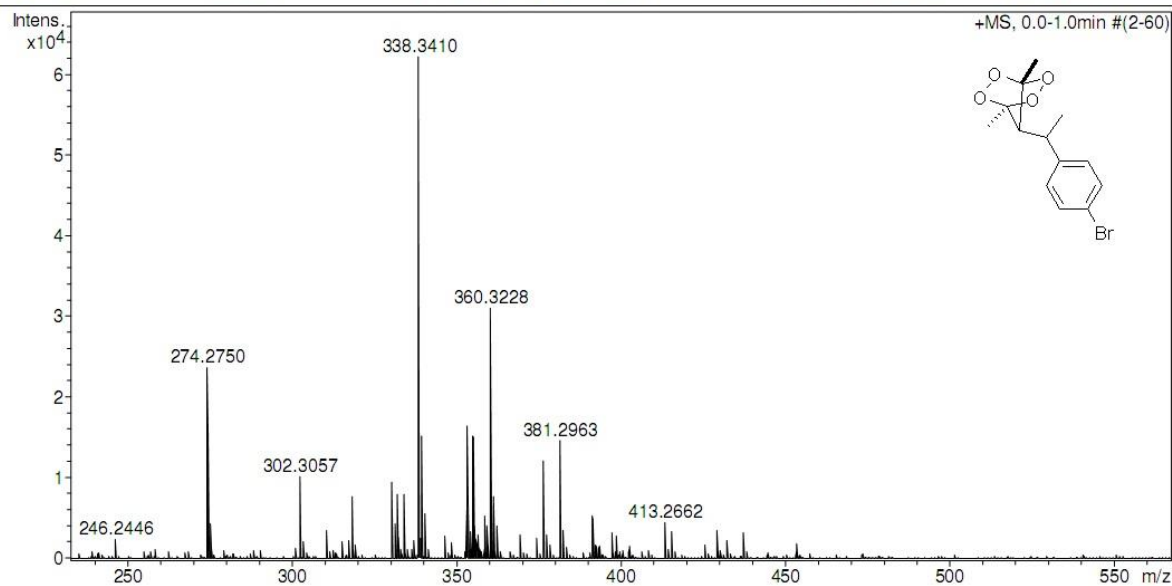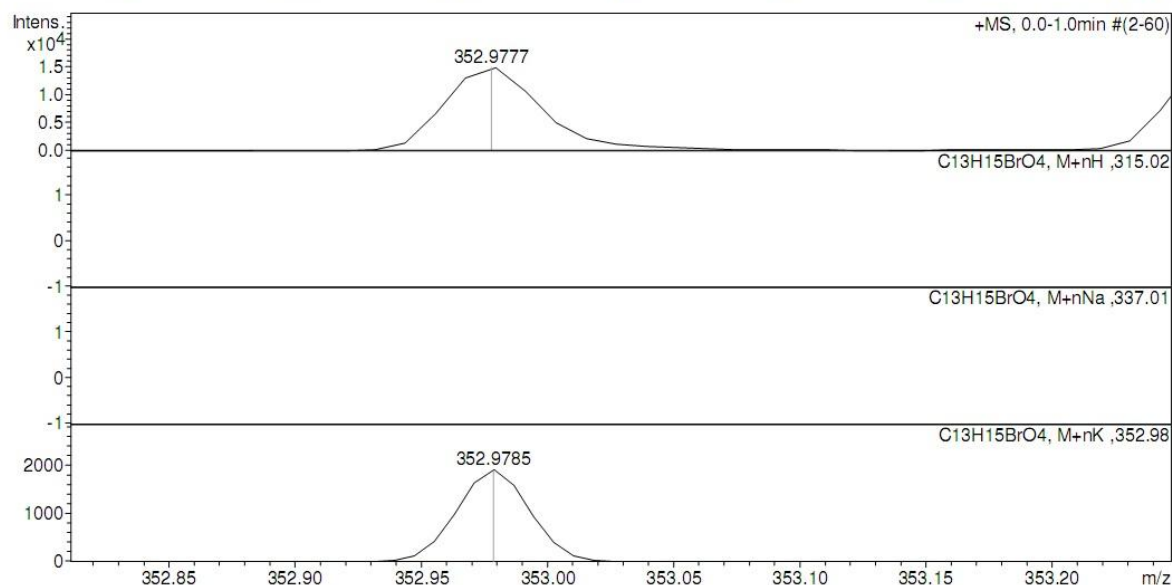

# 1,7-Dimethyl-4-phenyl-2,3,5,6-tetraoxabicyclo[2.2.1]heptane (2o)

## Display Report

### Analysis Info

Analysis Name D:\Data\khemchyan\daily\249.d  
Method tune\_low.m  
Sample Name 249  
Comment Solvent: MeCN  
Yaremenko I

Acquisition Date 7/25/2012 6:37:39 PM

Operator BDAL@DE  
Instrument maXis 43

### Acquisition Parameter

|             |            |                       |           |                  |           |
|-------------|------------|-----------------------|-----------|------------------|-----------|
| Source Type | ESI        | Ion Polarity          | Positive  | Set Nebulizer    | 0.4 Bar   |
| Focus       | Not active | Set Capillary         | 4500 V    | Set Dry Heater   | 180 °C    |
| Scan Begin  | 50 m/z     | Set End Plate Offset  | -500 V    | Set Dry Gas      | 4.0 l/min |
| Scan End    | 3000 m/z   | Set Collision Cell RF | 300.0 Vpp | Set Divert Valve | Source    |

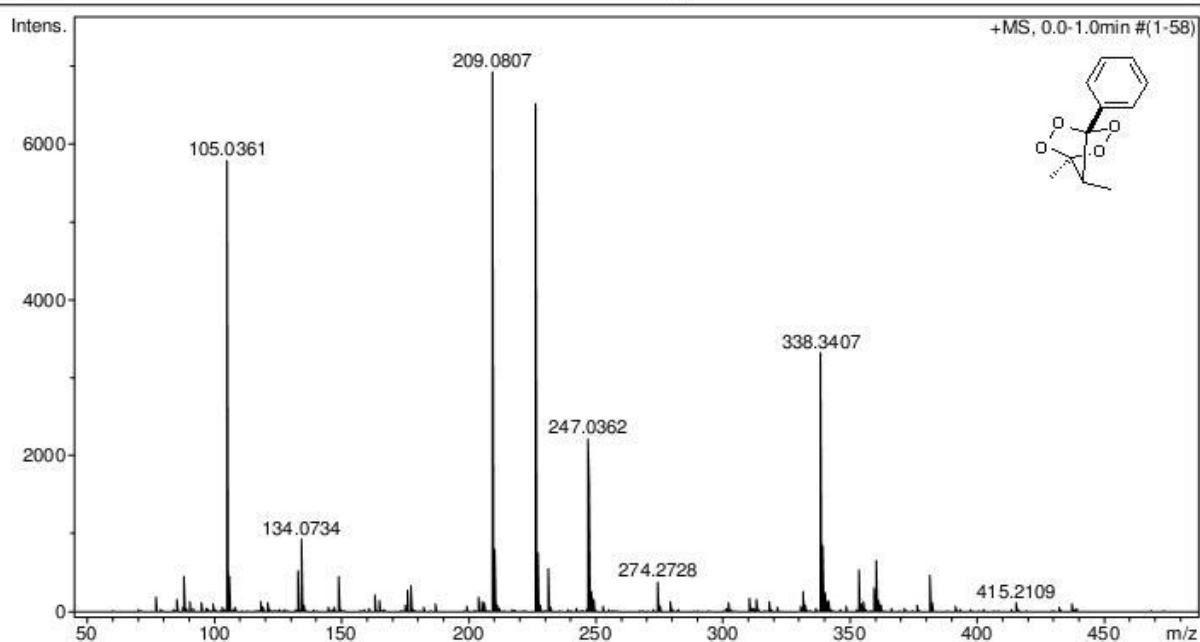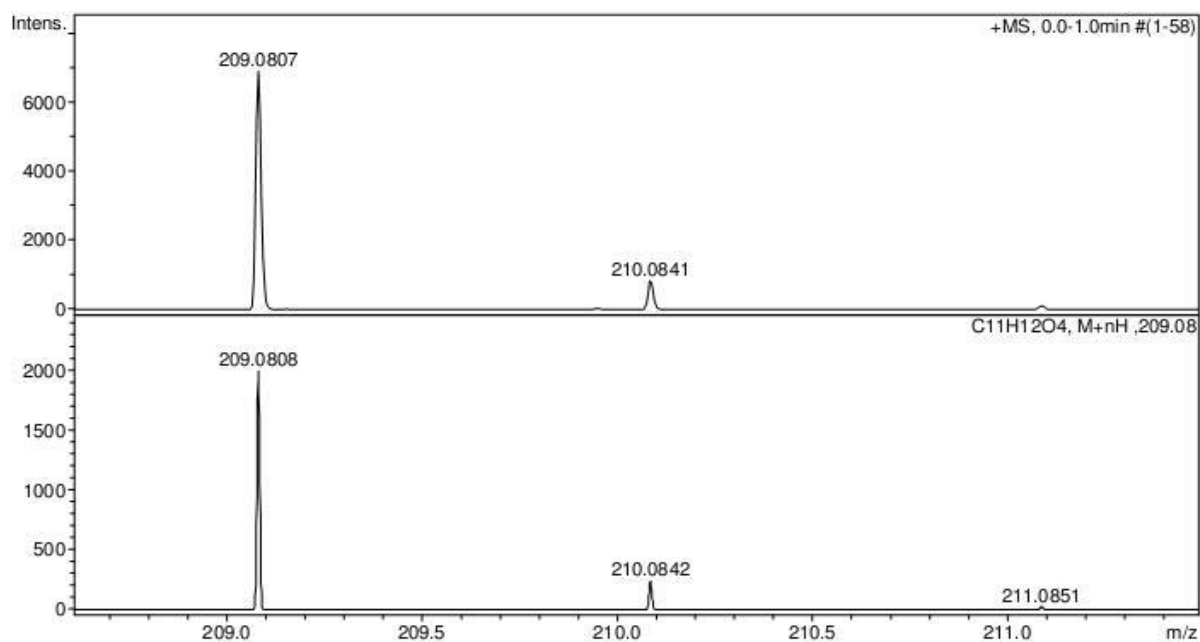

# 7-Benzyl-1-methyl-4-phenyl-2,3,5,6-tetraoxabicyclo[2.2.1]heptane (2p)

## Display Report

### Analysis Info

Analysis Name D:\Data\Chizhov\Nikishin\Terentiev\Yaremenko\bb-215\_low.d  
Method tune\_low.m  
Sample Name /TERN BB-215  
Comment CH<sub>3</sub>CN 100 %, dil. 200, no calibrant added

Acquisition Date 6/4/2012 4:06:52 PM

Operator BDAL@DE  
Instrument / Ser# microTOF 10248

### Acquisition Parameter

|             |            |                      |          |                  |           |
|-------------|------------|----------------------|----------|------------------|-----------|
| Source Type | ESI        | Ion Polarity         | Positive | Set Nebulizer    | 0.4 Bar   |
| Focus       | Not active |                      |          | Set Dry Heater   | 180 °C    |
| Scan Begin  | 50 m/z     | Set Capillary        | 4500 V   | Set Dry Gas      | 4.0 l/min |
| Scan End    | 3000 m/z   | Set End Plate Offset | -500 V   | Set Divert Valve | Waste     |

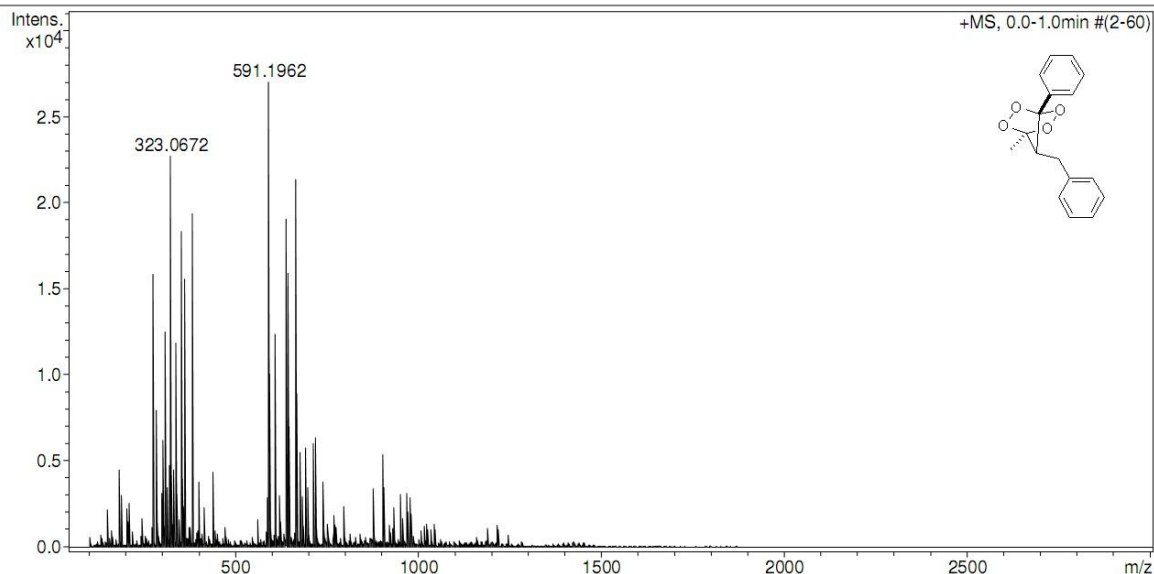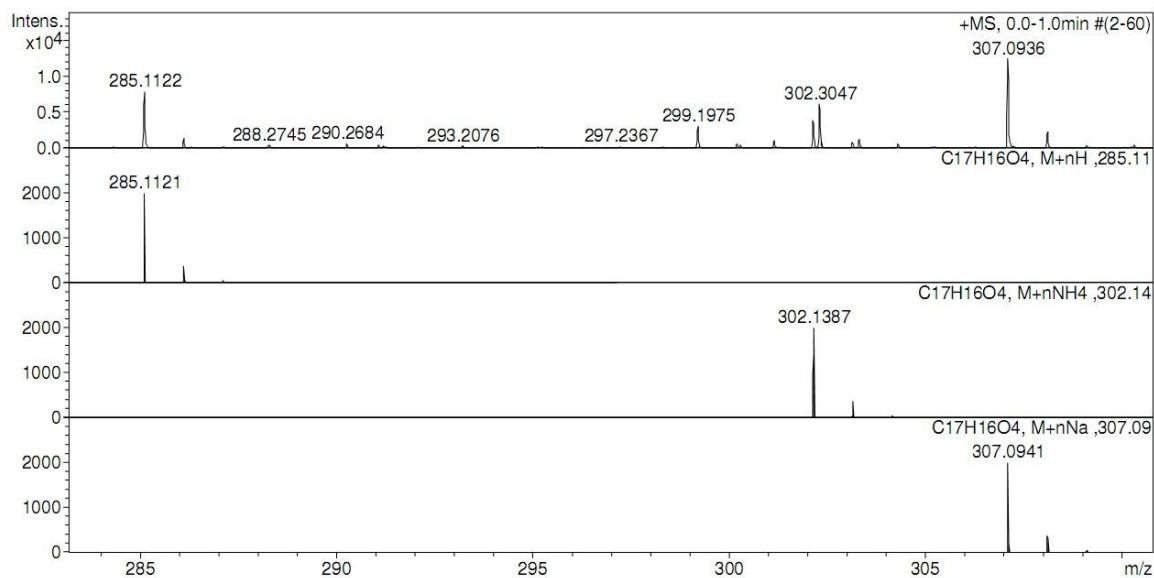



# 1,4-Diphenyl-7-methyl-2,3,5,6-tetraoxabicyclo[2.2.1]heptane (2q)

## Display Report

### Analysis Info

|               |                                                                 |                  |                       |    |
|---------------|-----------------------------------------------------------------|------------------|-----------------------|----|
| Analysis Name | D:\Data\khemchyan\MS service @ IOC\Yaremenko I\31_07_2012\252.d | Acquisition Date | 7/31/2012 11:40:22 AM |    |
| Method        | tune_low.m                                                      | Operator         | BDAL@DE               |    |
| Sample Name   | 252                                                             | Instrument       | maXis                 | 43 |
| Comment       | Yaremenko<br>MeCN                                               |                  |                       |    |

### Acquisition Parameter

|             |            |                       |           |                  |           |
|-------------|------------|-----------------------|-----------|------------------|-----------|
| Source Type | ESI        | Ion Polarity          | Positive  | Set Nebulizer    | 0.4 Bar   |
| Focus       | Not active | Set Capillary         | 4500 V    | Set Dry Heater   | 180 °C    |
| Scan Begin  | 50 m/z     | Set End Plate Offset  | -500 V    | Set Dry Gas      | 4.0 l/min |
| Scan End    | 3000 m/z   | Set Collision Cell RF | 300.0 Vpp | Set Divert Valve | Source    |

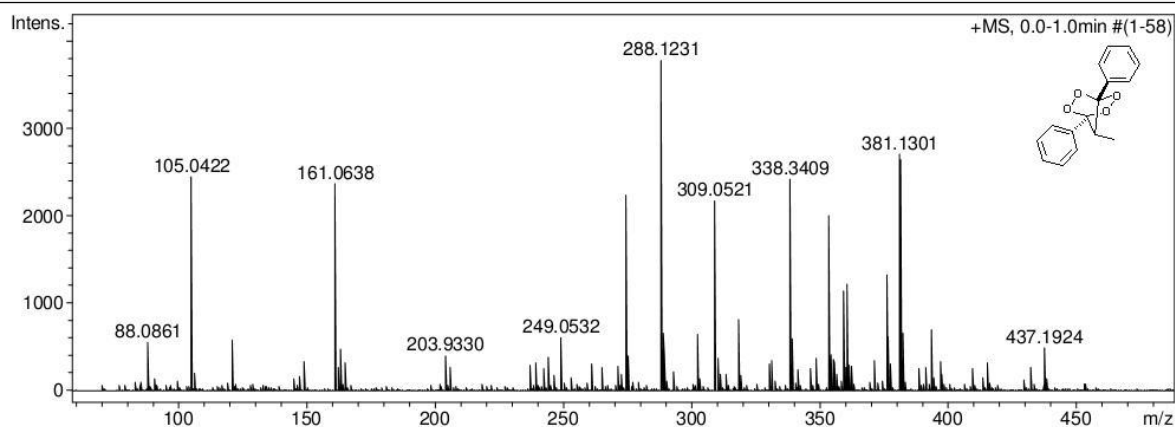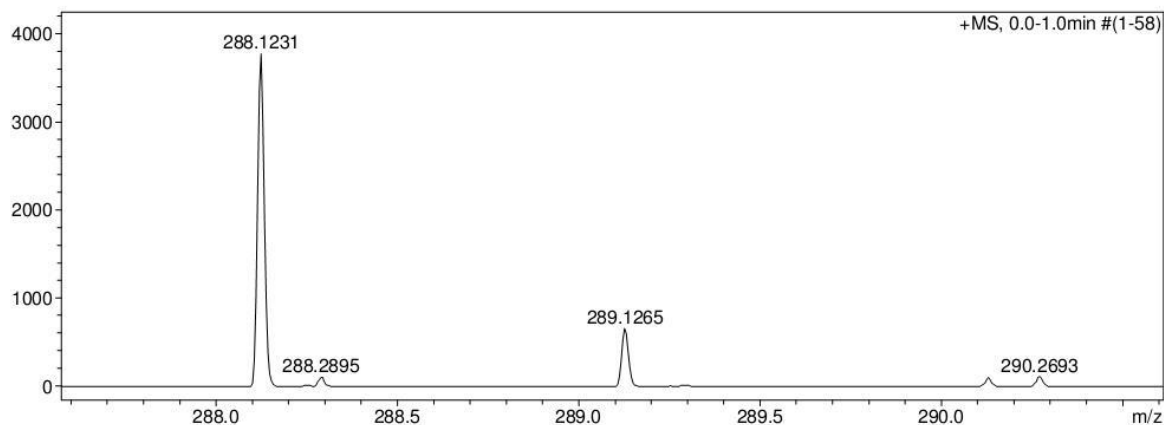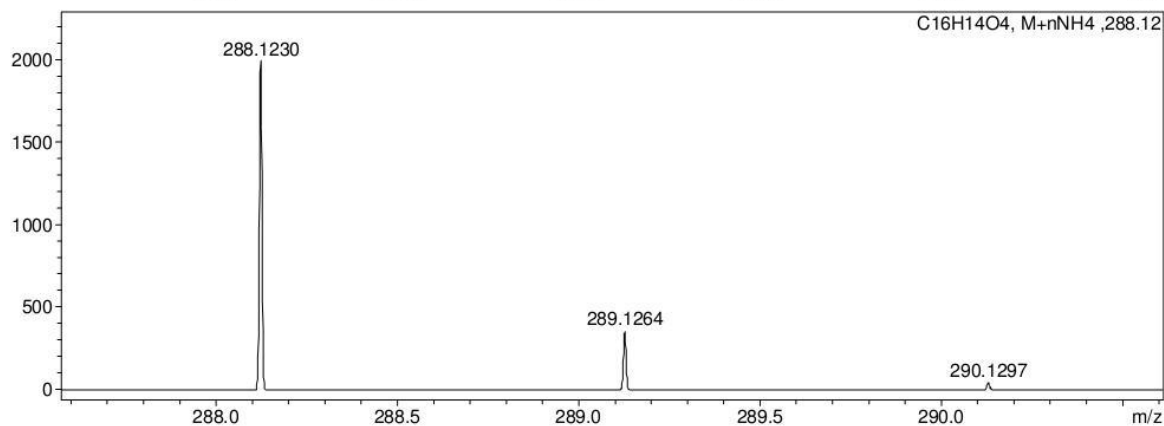

# 7-Benzyl-1,4-diphenyl-2,3,5,6-tetraoxabicyclo[2.2.1]heptane (2r)

## Display Report

### Analysis Info

Analysis Name D:\Data\khemchyan\MS service @ IOC\Yaremenko I\31\_07\_2012\254.d  
Method tune\_wide.m  
Sample Name 254  
Comment Yaremenko  
MeCN

Acquisition Date 7/31/2012 11:54:45 AM  
Operator BDAL@DE  
Instrument maXis 43

### Acquisition Parameter

|             |          |                       |            |                  |           |
|-------------|----------|-----------------------|------------|------------------|-----------|
| Source Type | ESI      | Ion Polarity          | Positive   | Set Nebulizer    | 0.4 Bar   |
| Focus       | Active   | Set Capillary         | 4500 V     | Set Dry Heater   | 180 °C    |
| Scan Begin  | 50 m/z   | Set End Plate Offset  | -500 V     | Set Dry Gas      | 4.0 l/min |
| Scan End    | 3000 m/z | Set Collision Cell RF | 1200.0 Vpp | Set Divert Valve | Waste     |

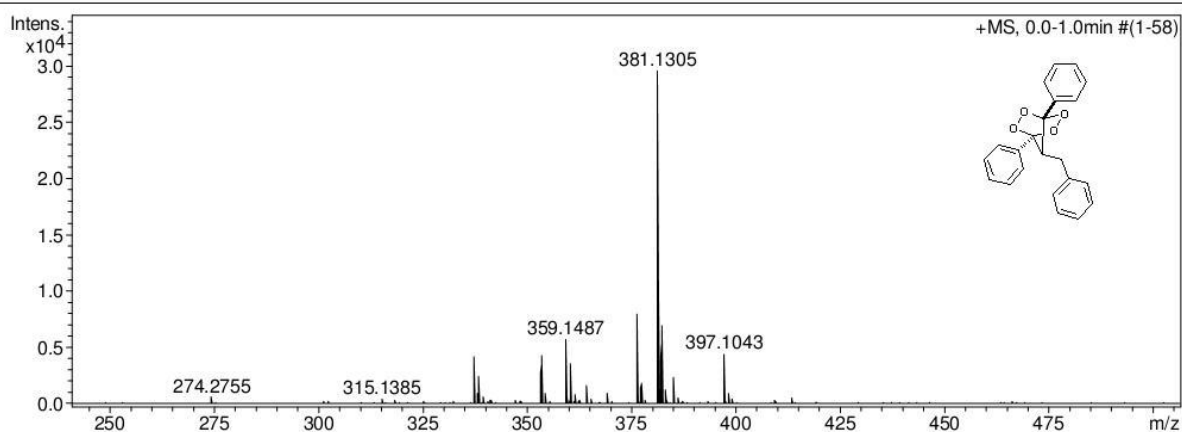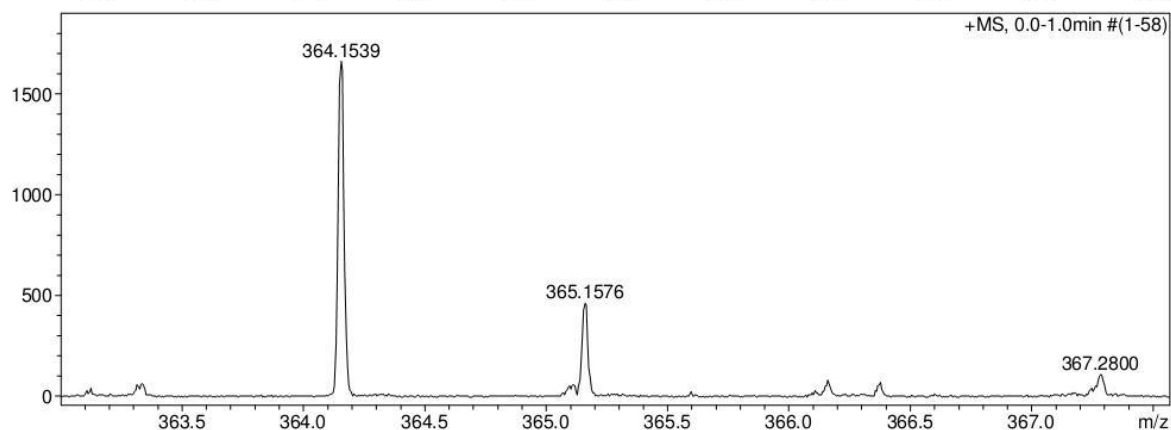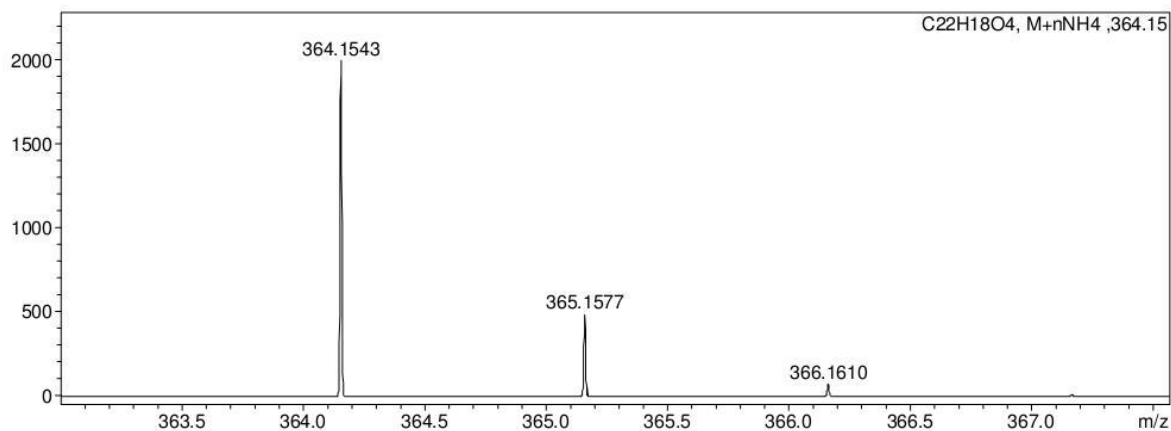



## IR spectrum of diketone

### 3-(1-Adamantyl)-6-methylheptane-2,4-dione (1j)

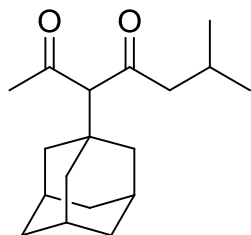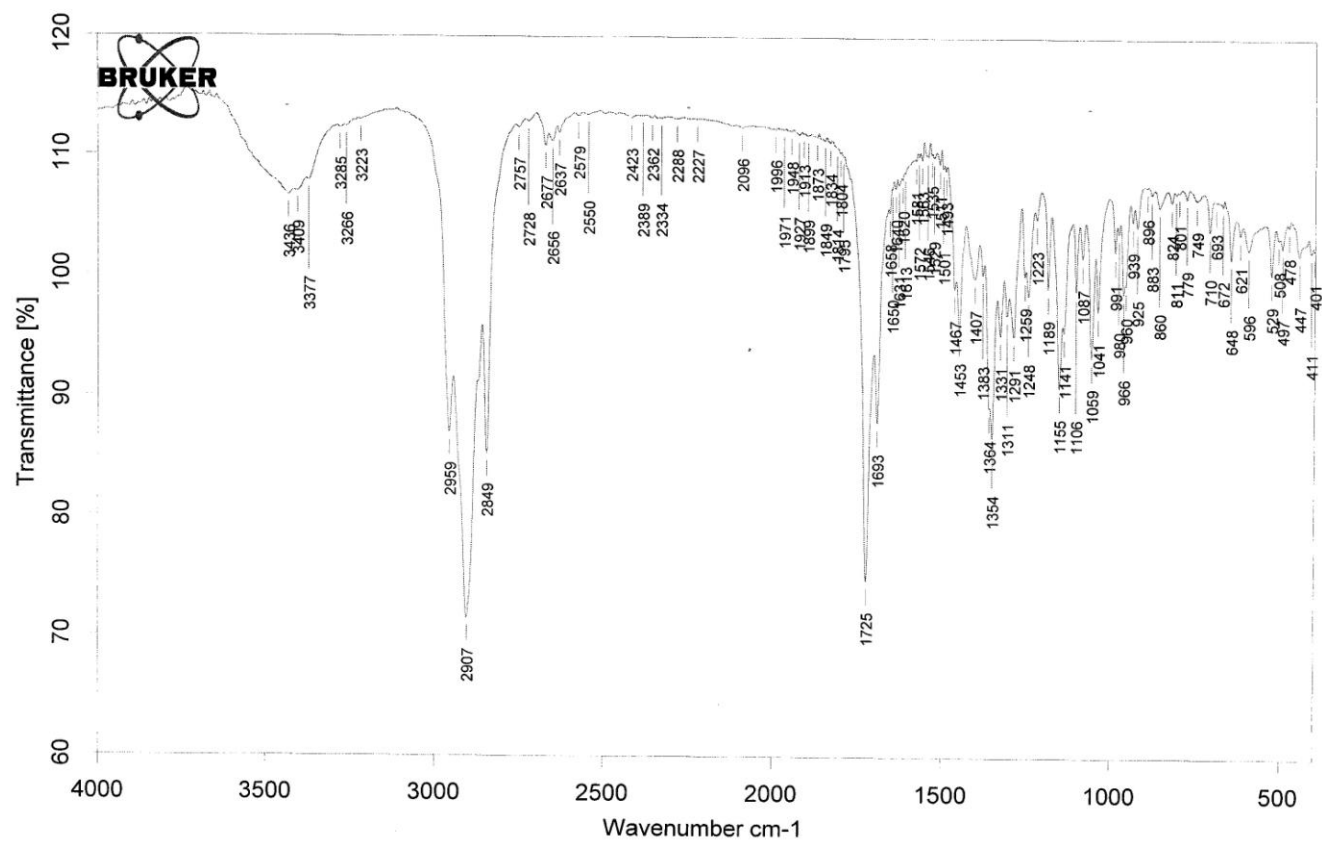

C:\Data\EDL\B-427.0

YAREMENKO. B-427, press.KBr,0.5/200.

16/10/2012

## IR spectra of tetraoxanes

### 1,4-Dimethyl-2,3,5,6-tetraoxabicyclo[2.2.1]heptane (2a)

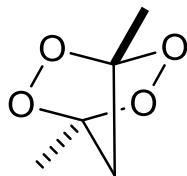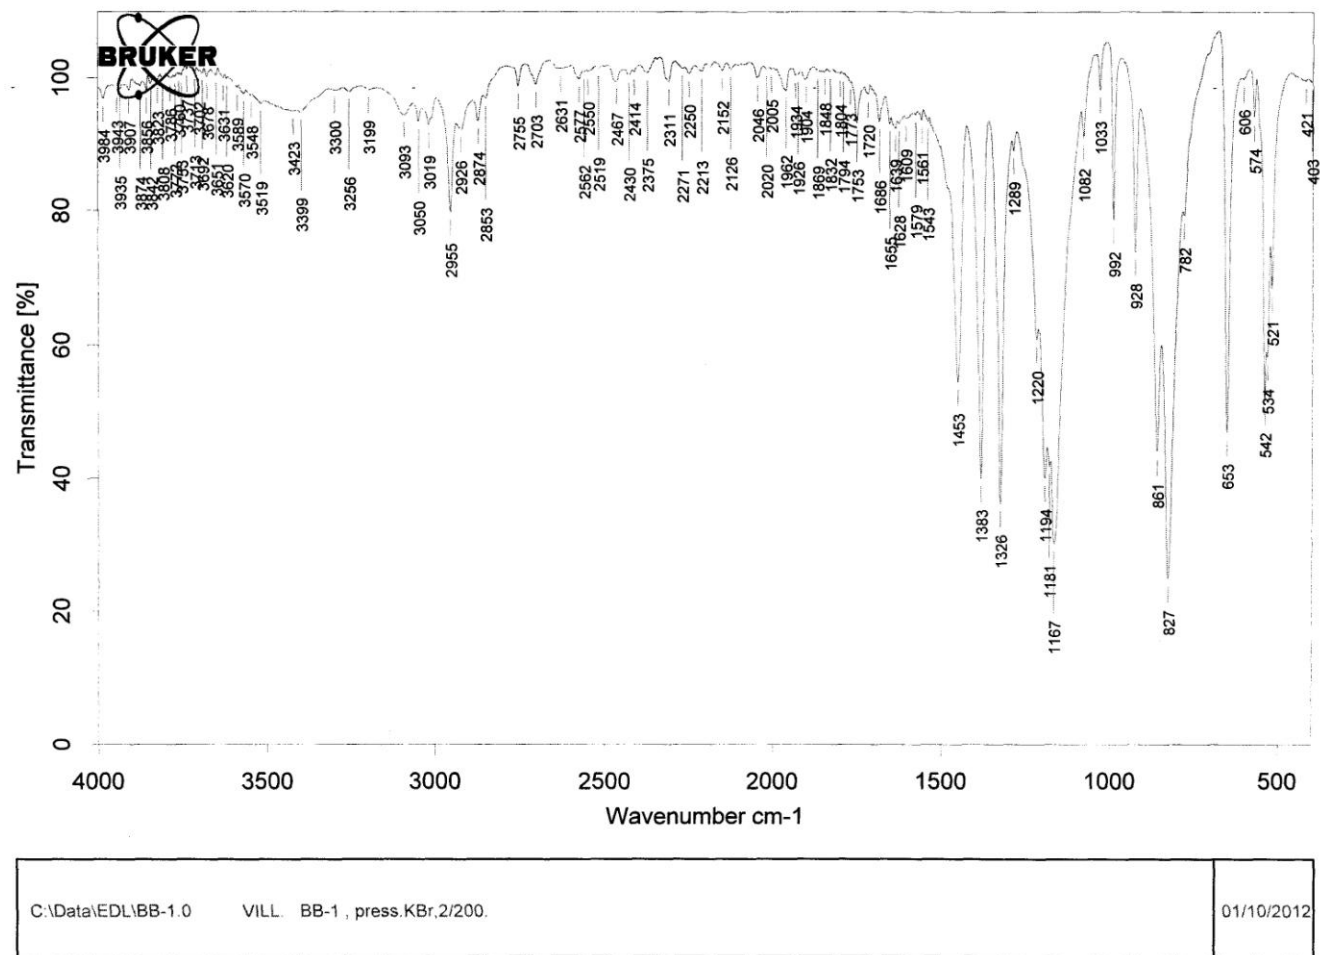

**1-Isobutyl-4-methyl-2,3,5,6-tetraoxabicyclo[2.2.1]heptane (2b)**

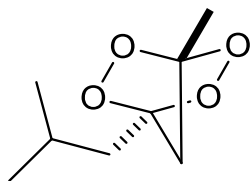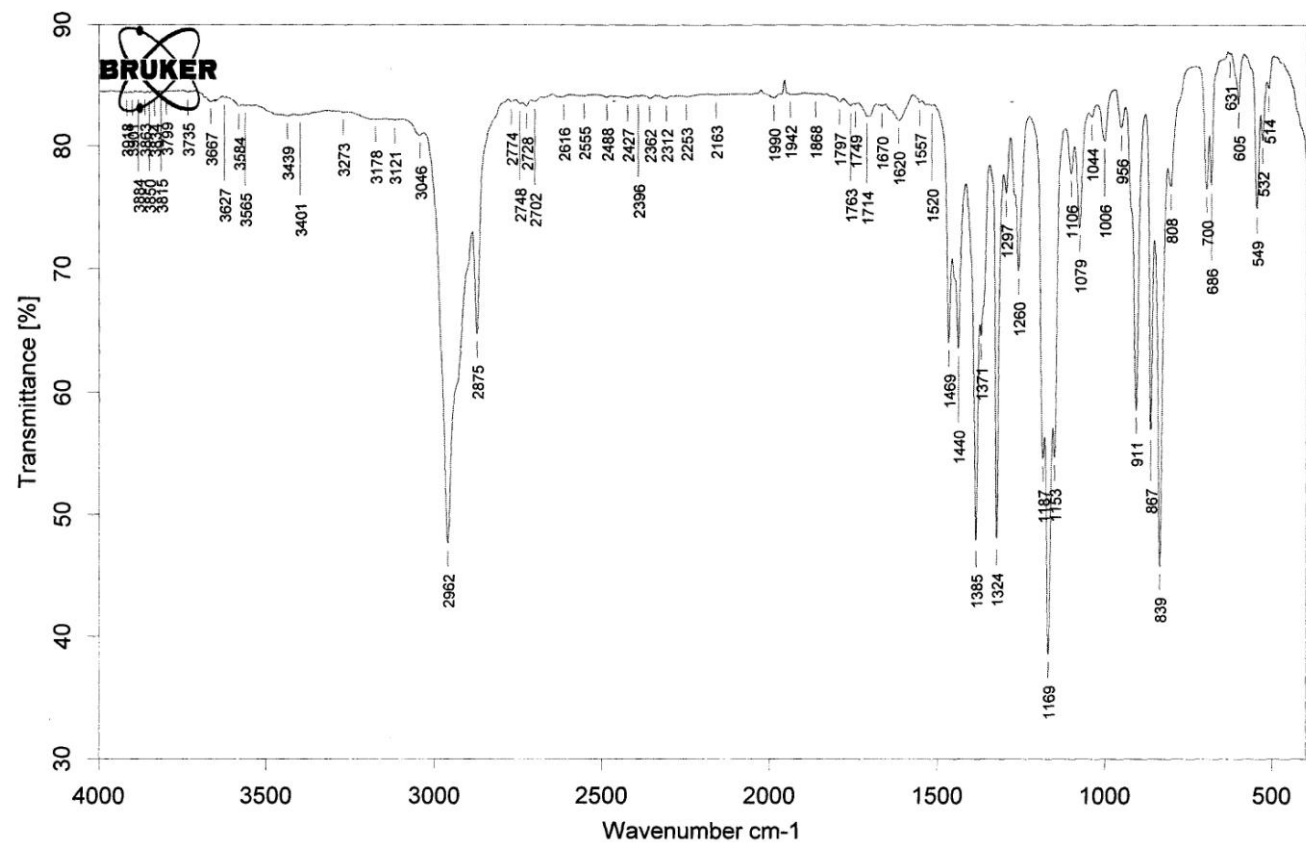

C:\Data\EDL\BB-2.0 VILL. BB-2, thin layer on KBr.

02/10/2012

1-Ethyl-4-isobutyl-2,3,5,6-tetraoxabicyclo[2.2.1]heptane (2c)

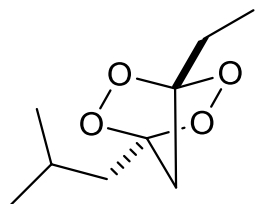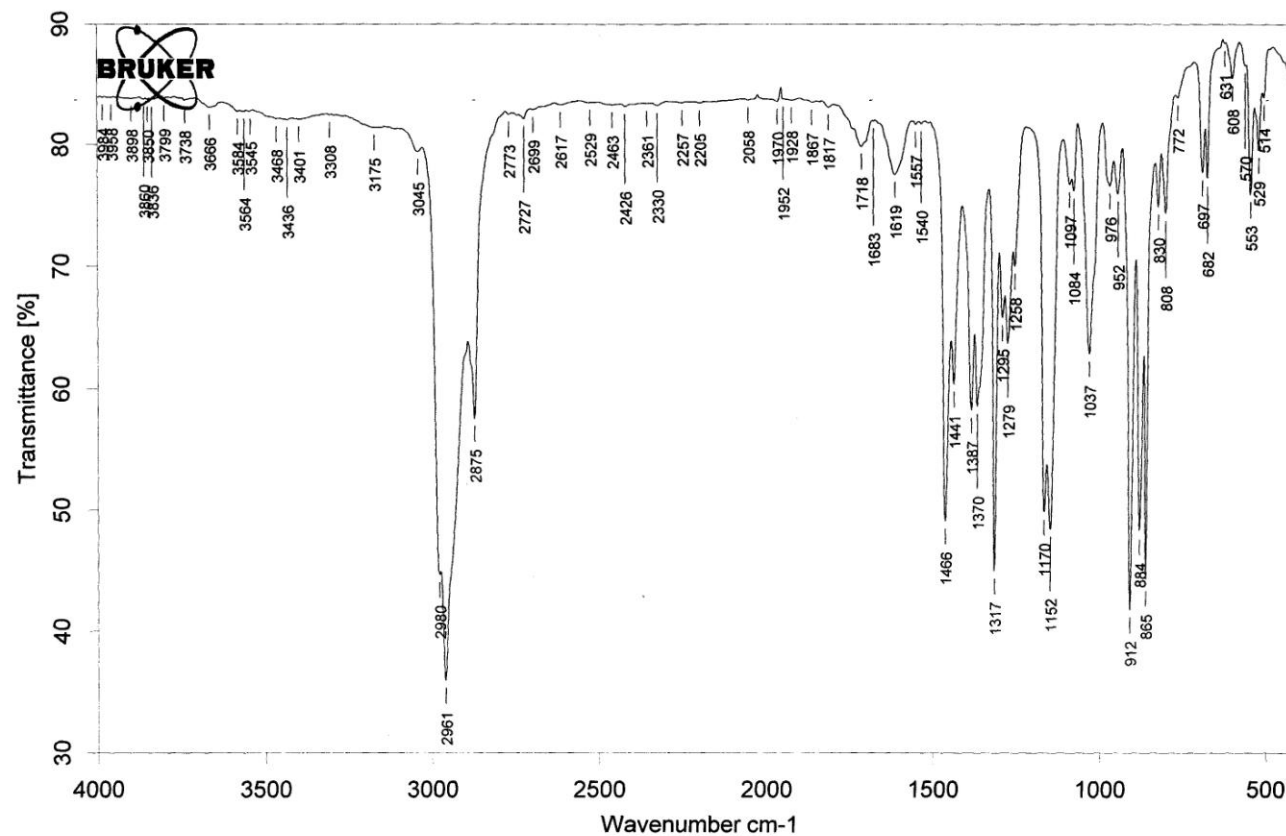

C:\Data\EDL\BB-3.1

VILL. BB-3, thin layer on KBr.

02/10/2012

1,4-Di-*tert*-butyl-2,3,5,6-tetraoxabicyclo[2.2.1]heptane (2d)

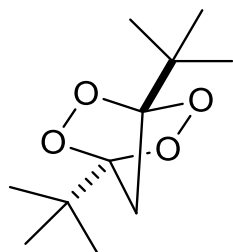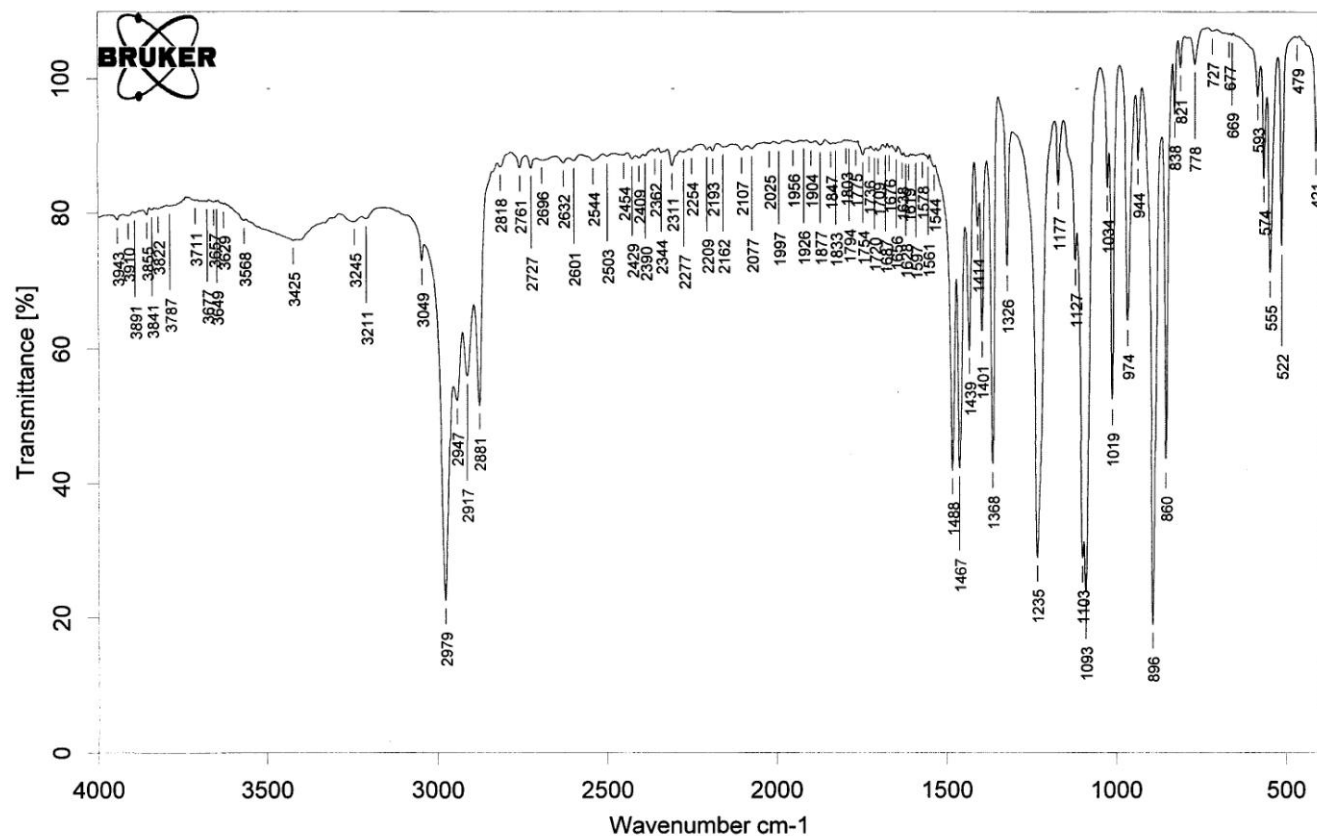

C:\Data\EDL\BB-4.0 VILL. BB-4, press.KBr,2/200.

01/10/2012

1-(1-Adamantyl)-4-methyl-2,3,5,6-tetraoxabicyclo[2.2.1]heptane (2e)

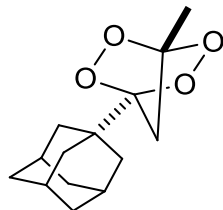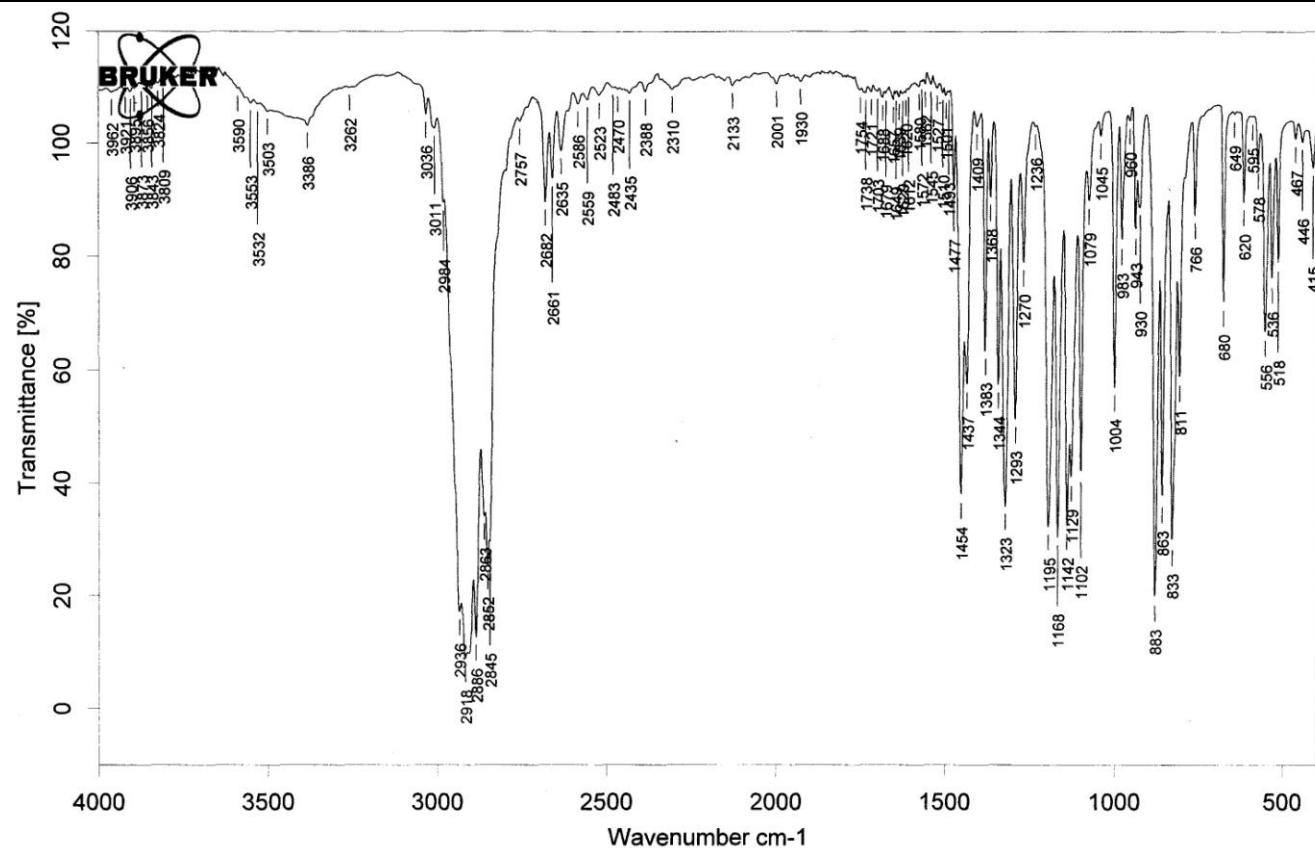

1-(1-Adamantyl)-4-ethyl-2,3,5,6-tetraoxabicyclo[2.2.1]heptane (2f)

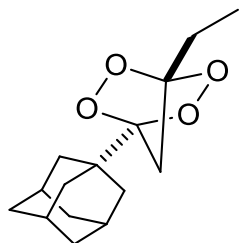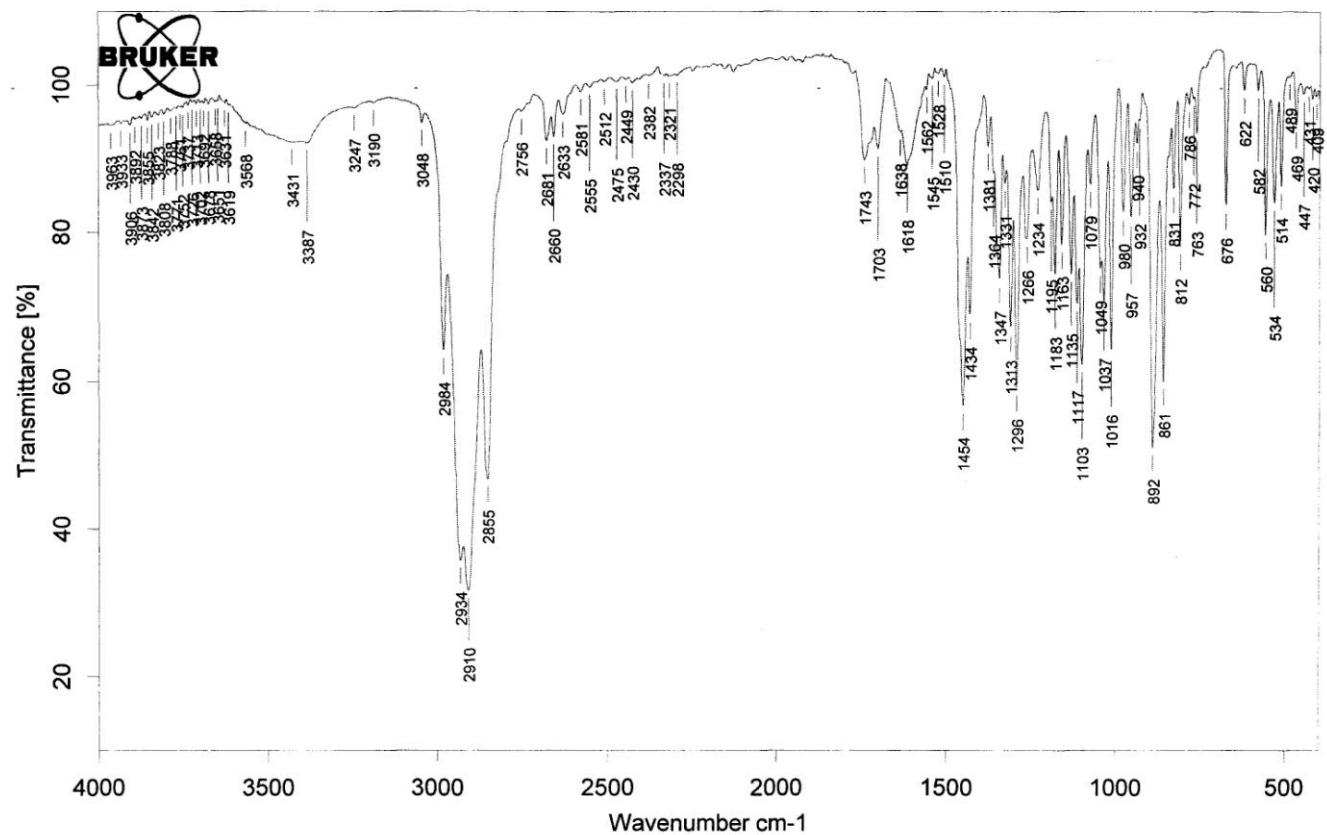

C:\Data\EDL\BB-6.0 VILL. BB-6, press.KBr,2/200.

01/10/2012



1,4-Dimethyl-7-hexyl-2,3,5,6-tetraoxabicyclo[2.2.1]heptane (2g)

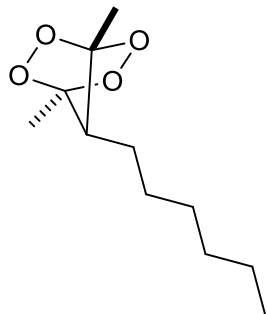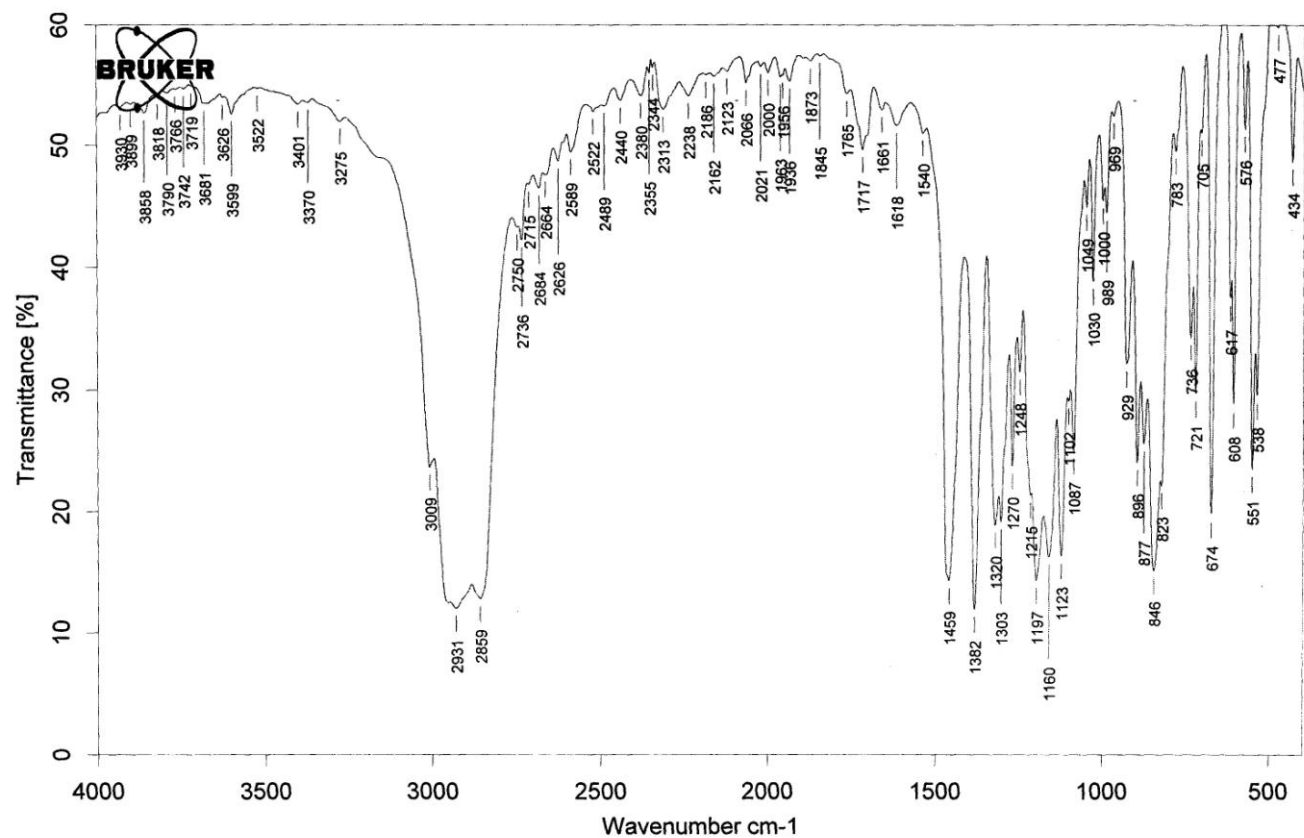

C:\Data\EDL\BB-7.0 VILL. BB-7, thin layer on KBr.

02/10/2012



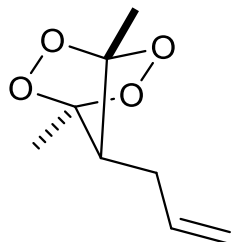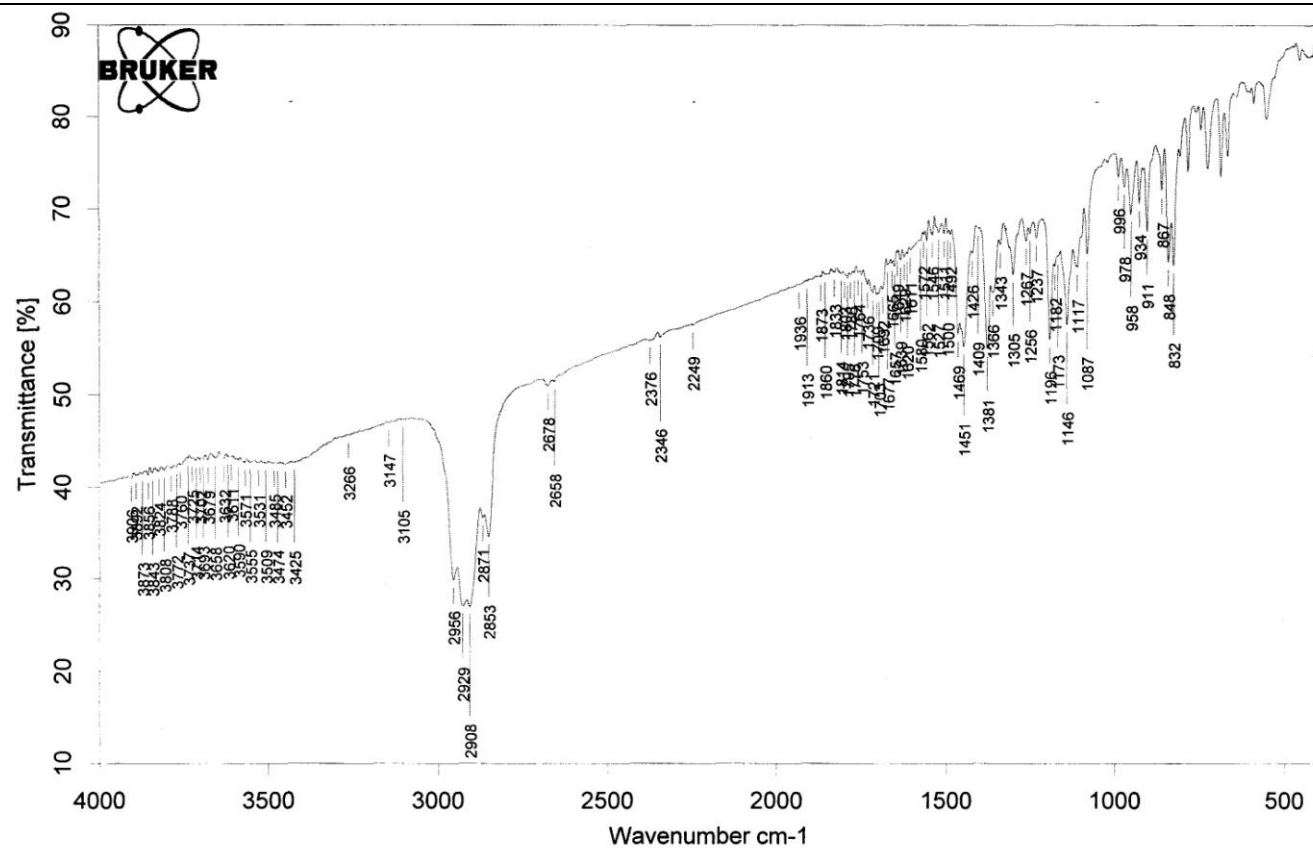

01/10/2012

7-(1-Adamanty)-1,4-dimethyl-2,3,5,6-tetraoxabicyclo[2.2.1]heptane (2i)

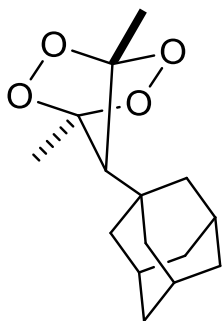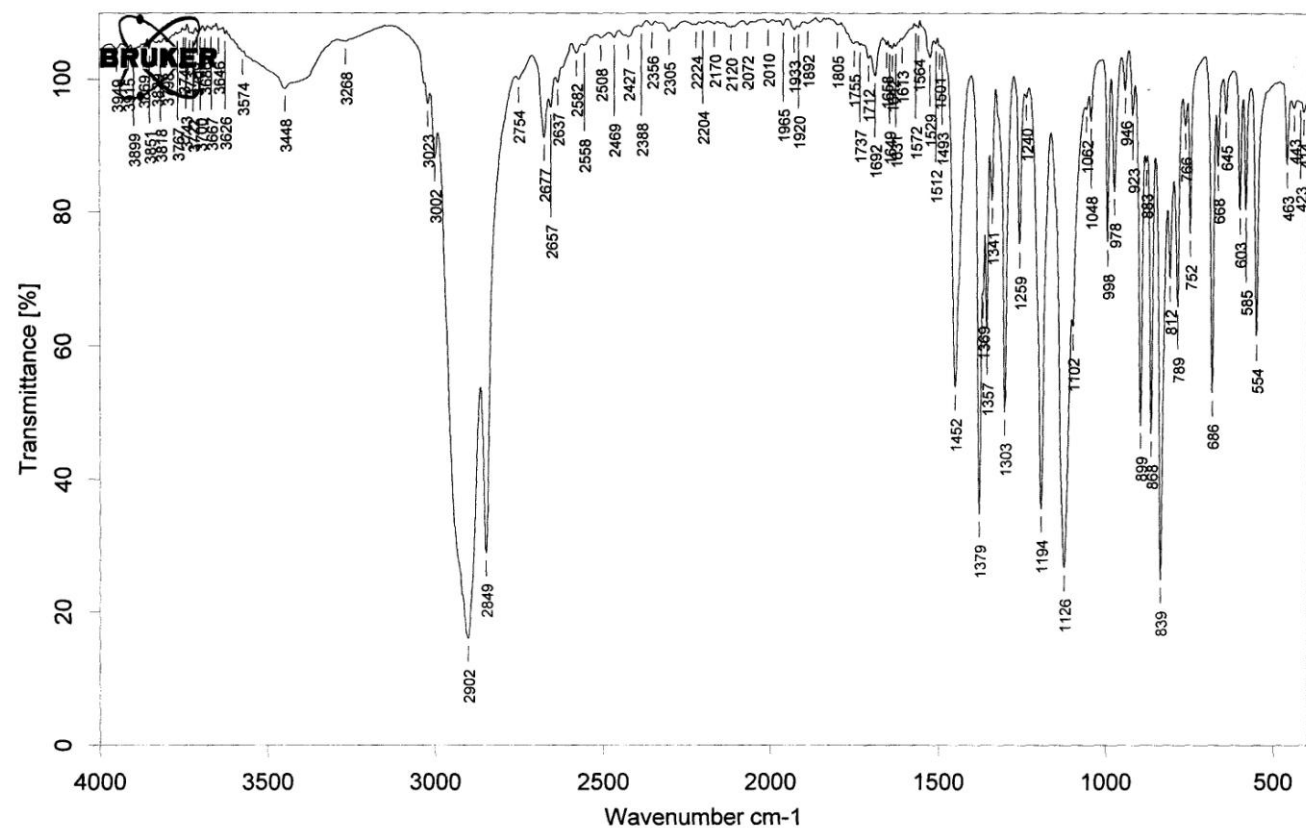

C:\Data\EDL\BB-9.0 VILL. BB-9, press.KBr,2/200.

02/10/2012

7-(1-Adamantyl)-1-isobutyl-4-methyl-2,3,5,6-tetraoxabicyclo[2.2.1]heptane (2j)

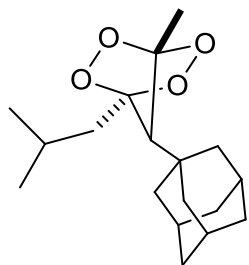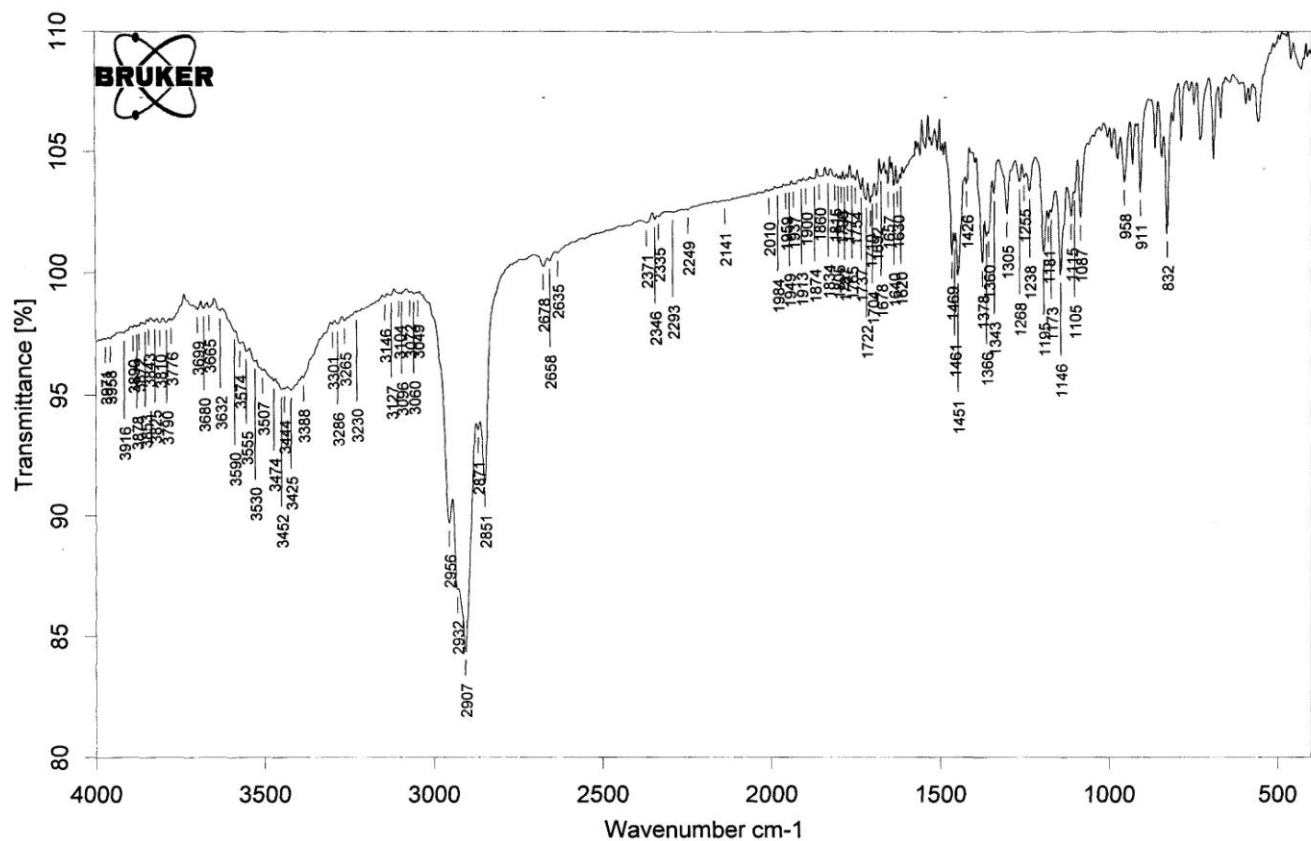

C:\Data\EDL\BB-10.0

VILL. BB-10, press.KBr, ~1/200.

01/10/2012

7-Benzyl-1,4-dimethyl-2,3,5,6-tetraoxabicyclo[2.2.1]heptane (2k)

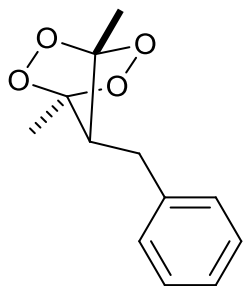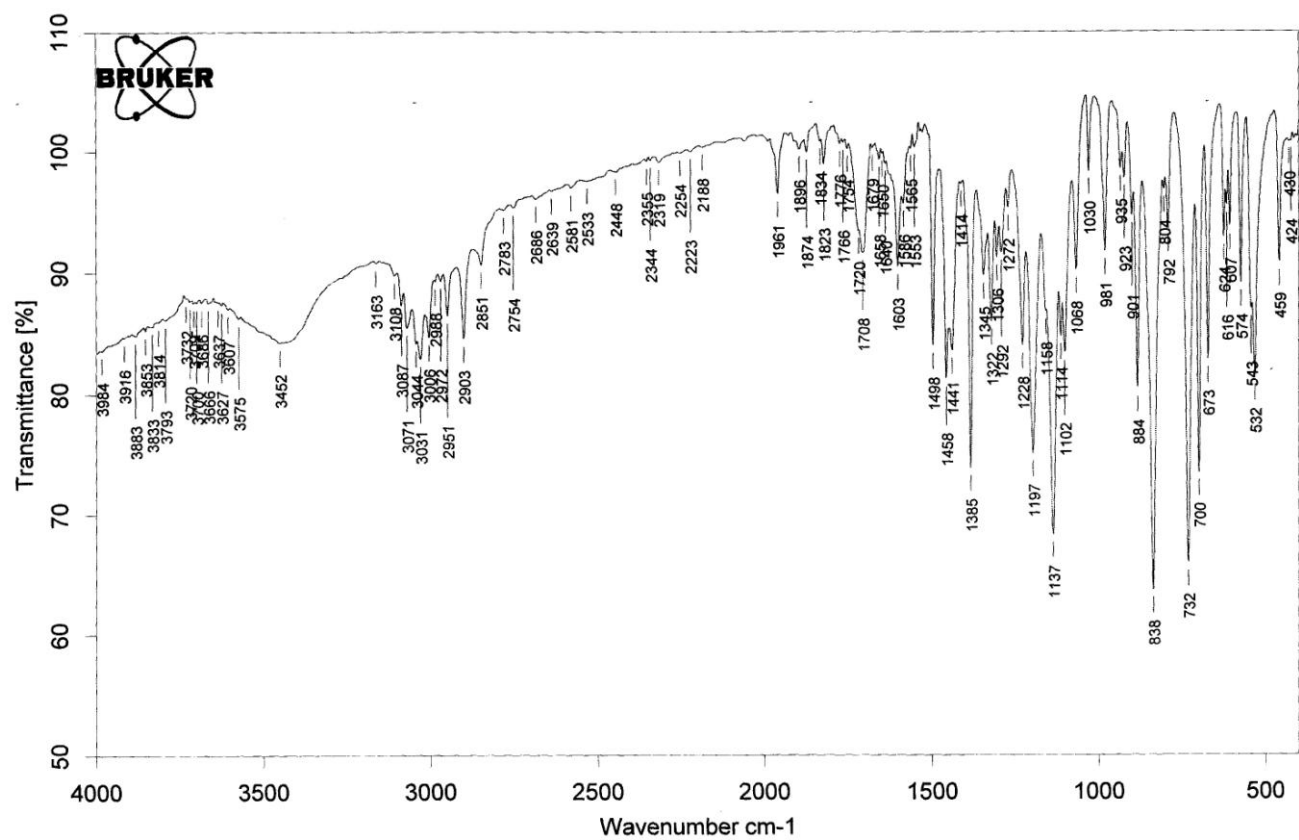

C:\Data\EDL\BB-11.0 VILL. BB-11, press.KBr, 1/200.

01/10/2012

# 1,4-Dimethyl-7-(1-phenylethyl)-2,3,5,6-tetraoxabicyclo[2.2.1]heptanes (2l)

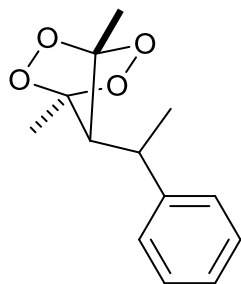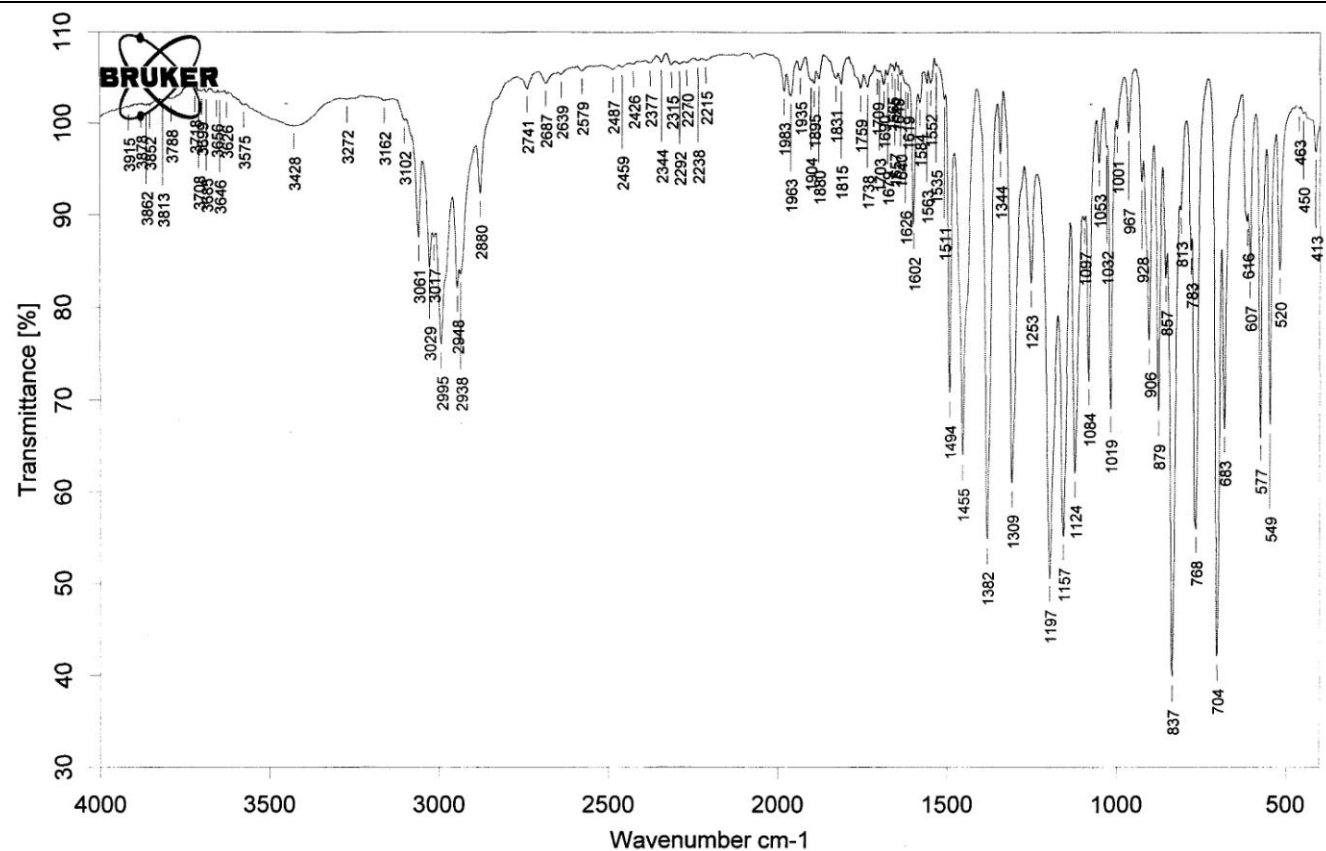

C:\Data\EDL\BB-12.0 VILL. BB-12, press.KBr, 1/200.

01/10/2012

1,4-Dimethyl-7-[1-(4-methylphenyl)ethyl]-2,3,5,6-tetraoxabicyclo[2.2.1]heptane (2m)

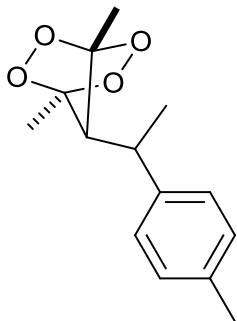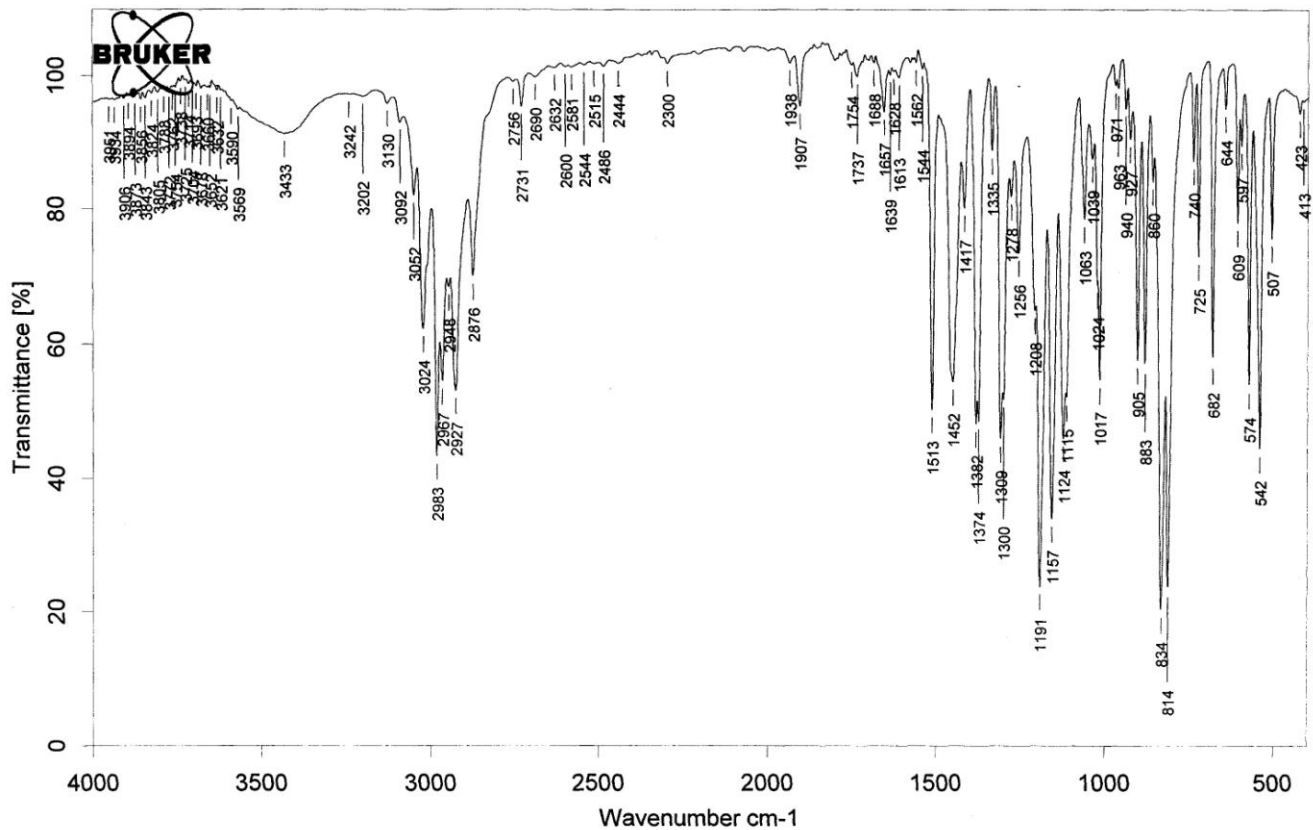

C:\Data\EDL\BB-13.0 VILL. BB-13, press.KBr,2/200.

02/10/2012

7-[1-(4-Bromophenyl)ethyl]-1,4-dimethyl-2,3,5,6-tetraoxabicyclo[2.2.1]heptane (2n)

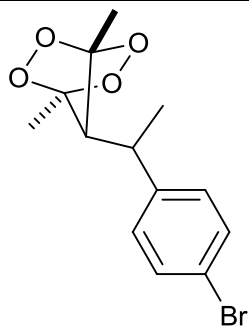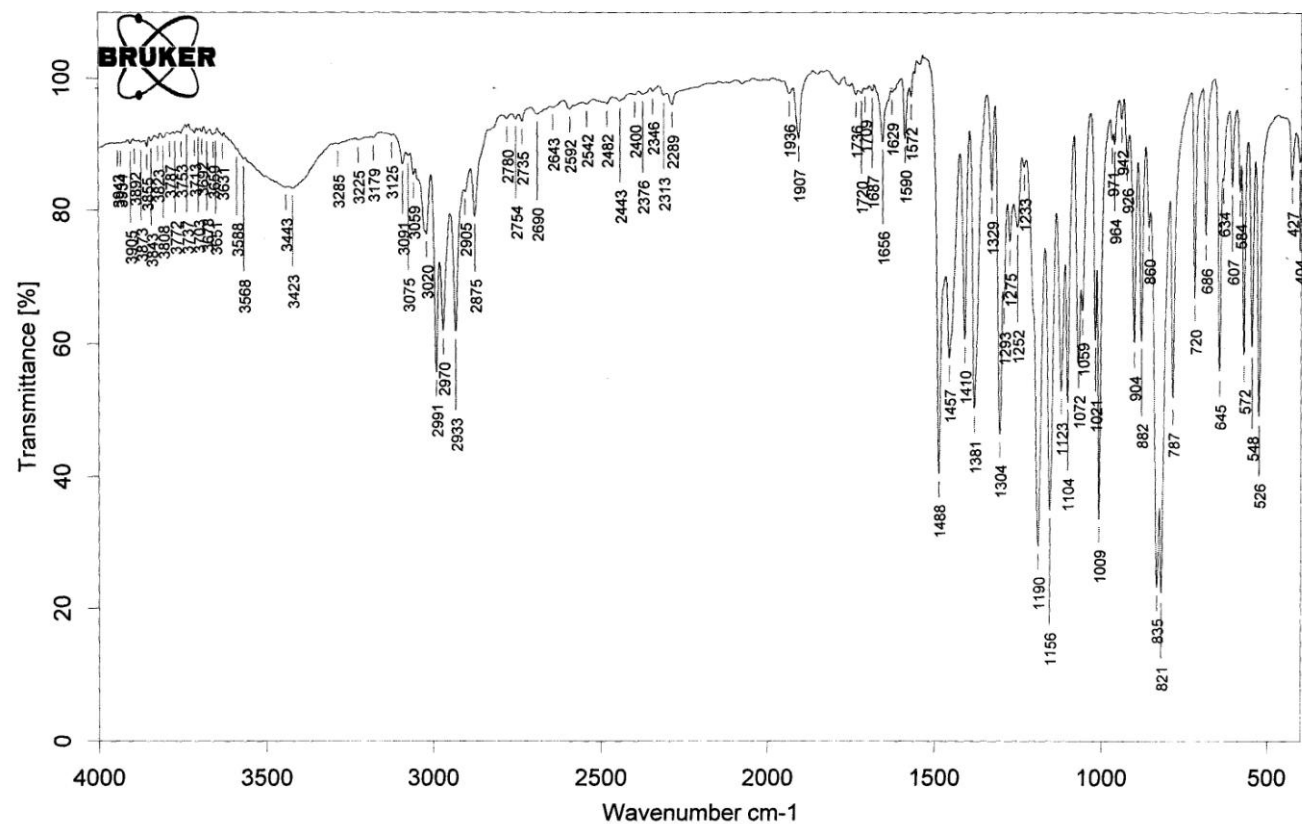

C:\Data\EDL\BB-14.0 VILL. BB-14, press.KBr,2/200.

02/10/2012



1,7-Dimethyl-4-phenyl-2,3,5,6-tetraoxabicyclo[2.2.1]heptane (2o)

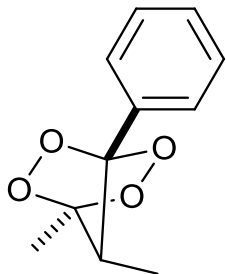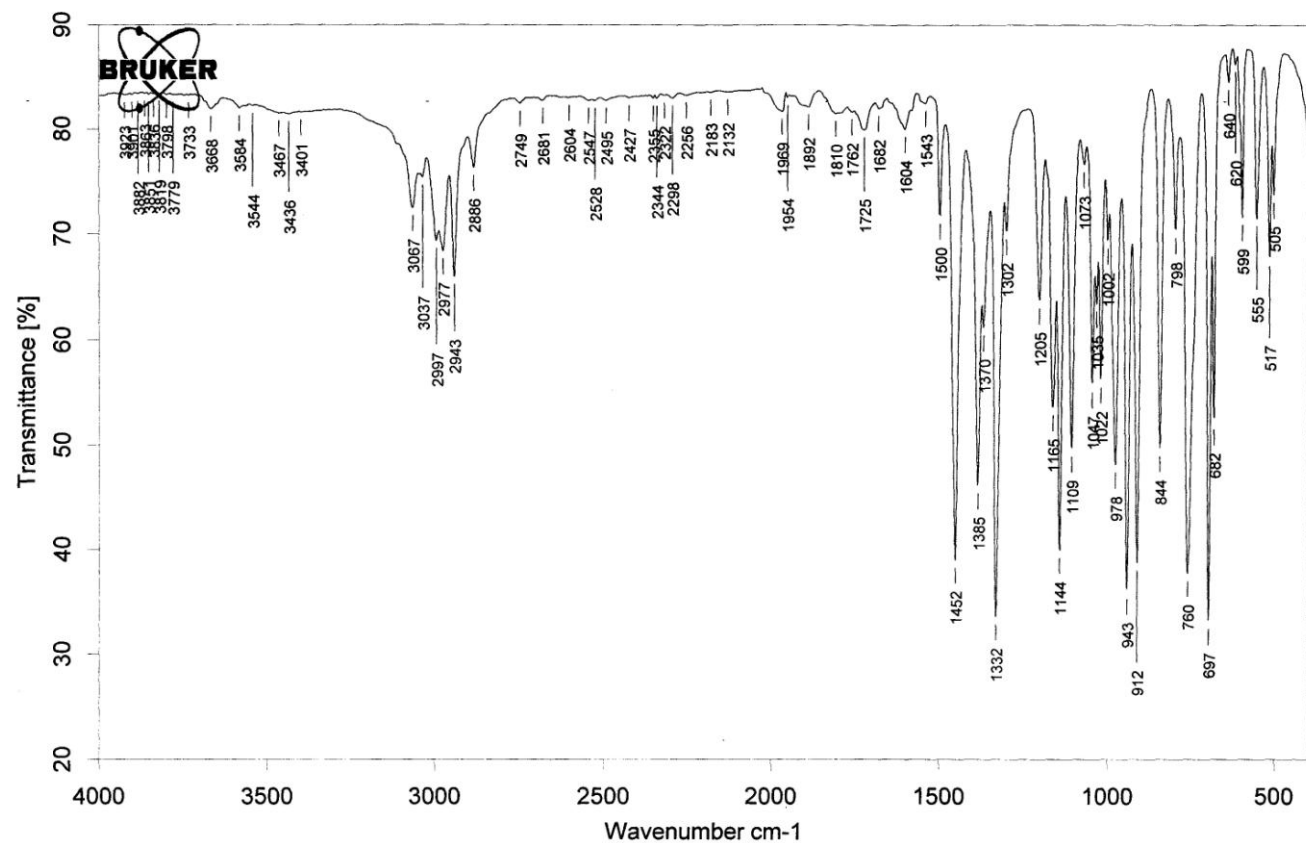

C:\Data\EDL\BB-15.0 VILL. BB-15, thin layer on KBr.

02/10/2012



7-Benzyl-1-methyl-4-phenyl-2,3,5,6-tetraoxabicyclo[2.2.1]heptane (2p)

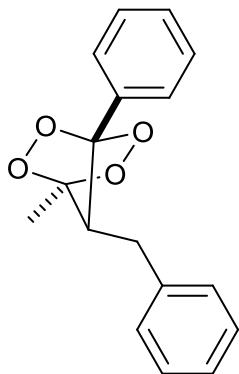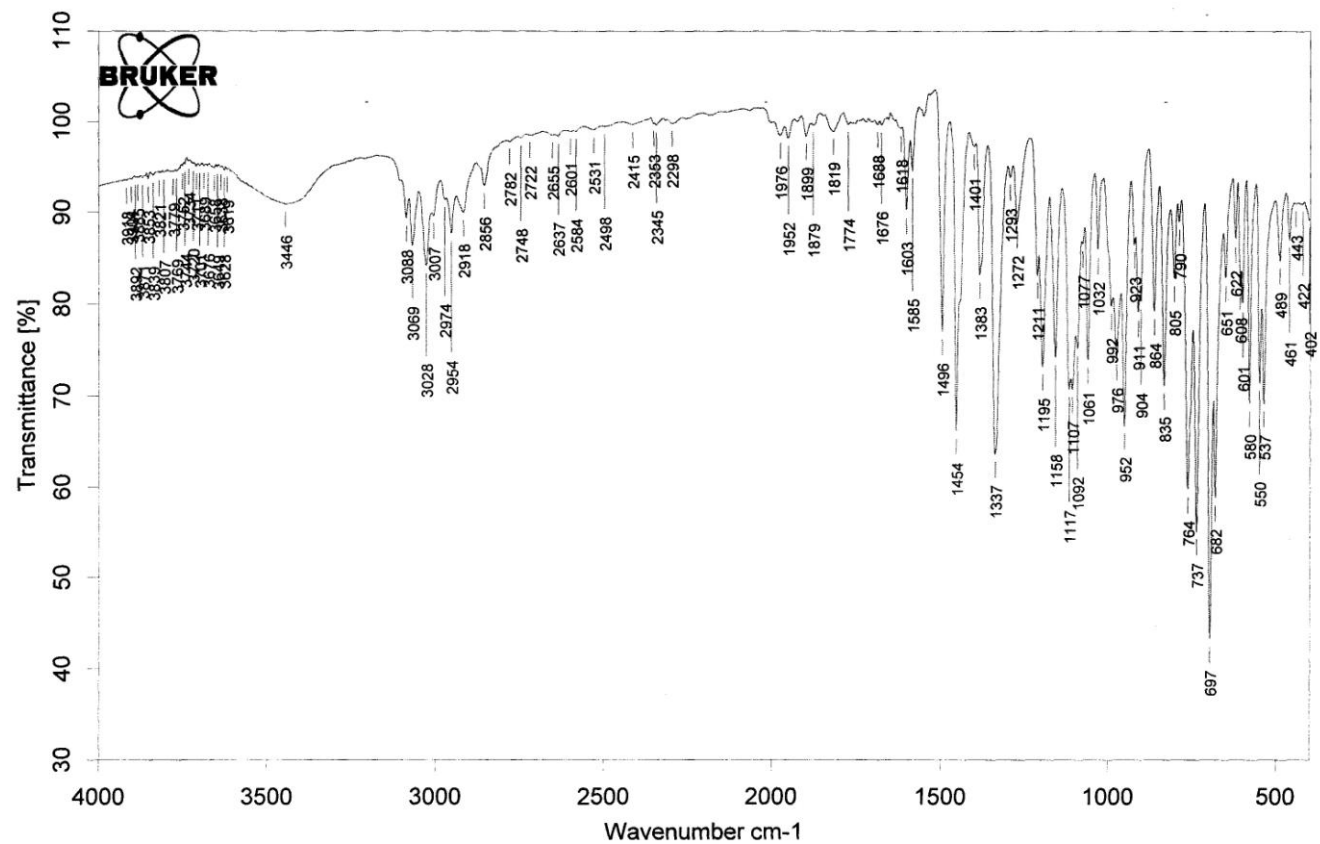

C:\Data\EDL\BB-16.0 VILL. BB-16, press.KBr,2/200.

02/10/2012

1,4-Diphenyl-7-methyl-2,3,5,6-tetraoxabicyclo[2.2.1]heptane (2q)

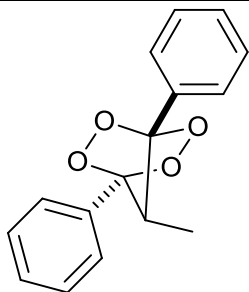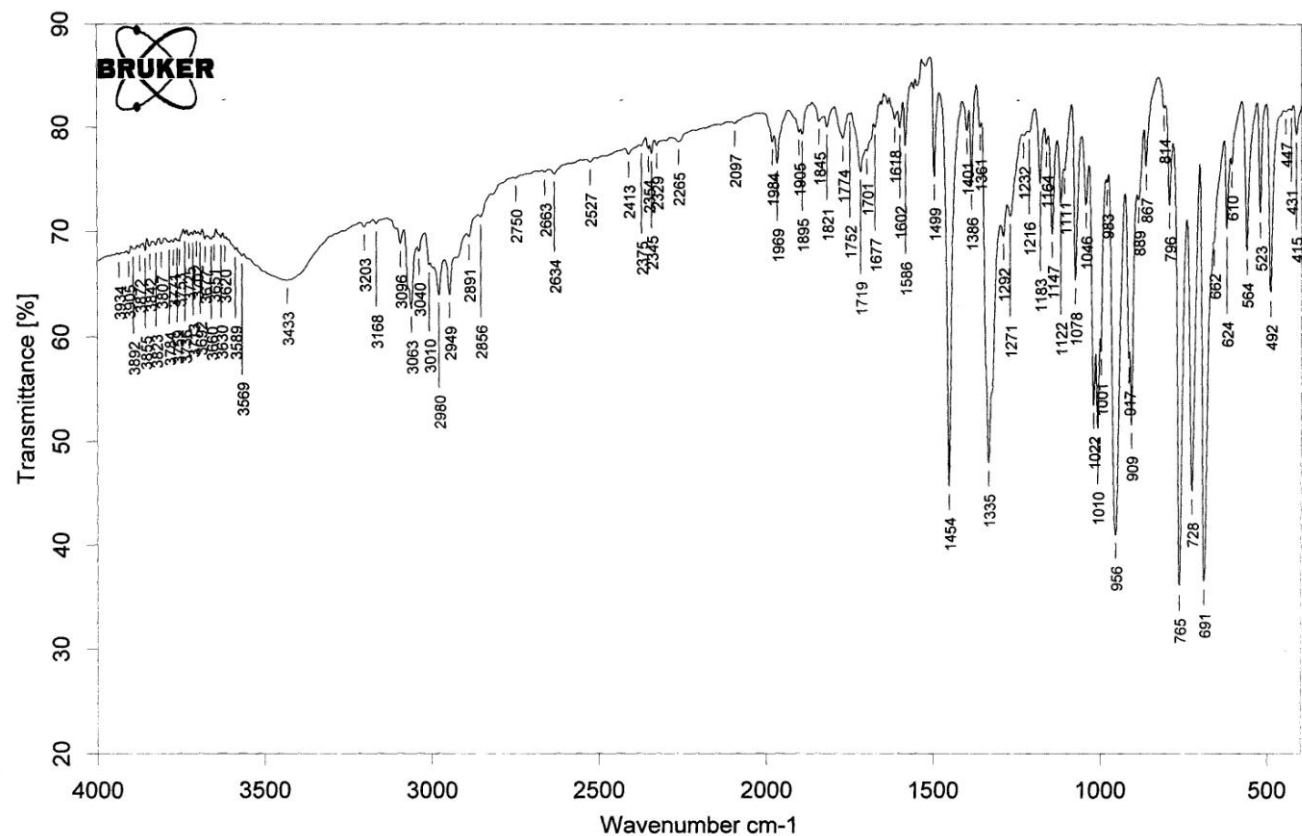

C:\Data\EDL\BB-17.0 VILL. BB-17, press.KBr,2/200.

02/10/2012

7-Benzyl-1,4-diphenyl-2,3,5,6-tetraoxabicyclo[2.2.1]heptane (2r)

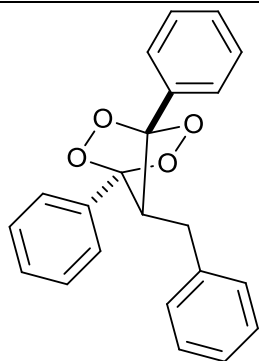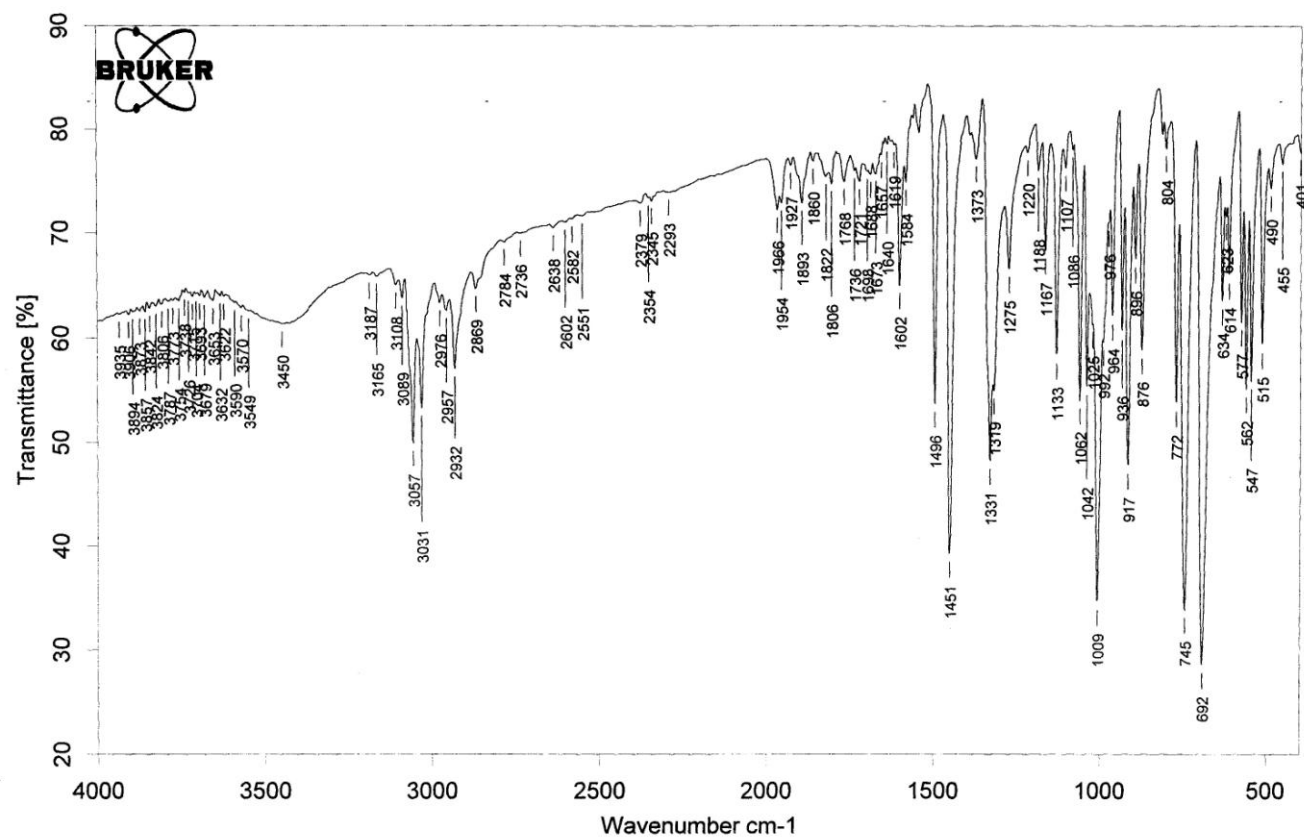

C:\Data\EDL\BB-18.0 VILL. BB-18, press.KBr,2/200.

02/10/2012

## Monitoring of the PMA-catalyzed reaction of pentane-2,4-dione **1a** with H<sub>2</sub>O<sub>2</sub>

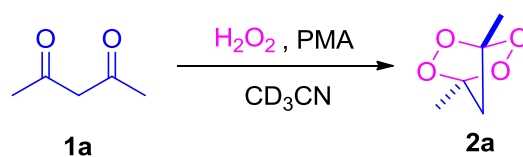

A 37% aqueous H<sub>2</sub>O<sub>2</sub> solution (115.8 mg, 1.26 mmol) and phosphomolybdic acid (PMA) (133.2 mg, 0.06 mmol) were successively added to a solution of diketone **1a** (42 mg, 0.42 mmol) in CD<sub>3</sub>CN (0.7 mL) at room temperature in an NMR tube. The course of the reaction was monitored in an NMR tube.

Pentane-2,4-dione **1a**: <sup>13</sup>C NMR (75.48 MHz, CD<sub>3</sub>CN), δ: 24.9 (CH<sub>3</sub>), 31.0 (CH<sub>3</sub>), 58.7 (CH<sub>2</sub>), 101.1 (CH), 192.7(C(O)), 204.0 (C(O)). CH<sub>3</sub>COOH: <sup>13</sup>C NMR (75.48 MHz, CD<sub>3</sub>CN), δ: 20.73 (CH<sub>3</sub>), 173.21 (CO). <sup>13</sup>C NMR for acetic acid <sup>31</sup>.

1,4-Dimethyl-2,3,5,6-tetraoxabicyclo[2.2.1]heptane **2a**: <sup>13</sup>C NMR (75.48 MHz, CD<sub>3</sub>CN), δ: 10.7 (CH<sub>3</sub>), 51.2 (CH<sub>2</sub>), 111.0 (OCO).

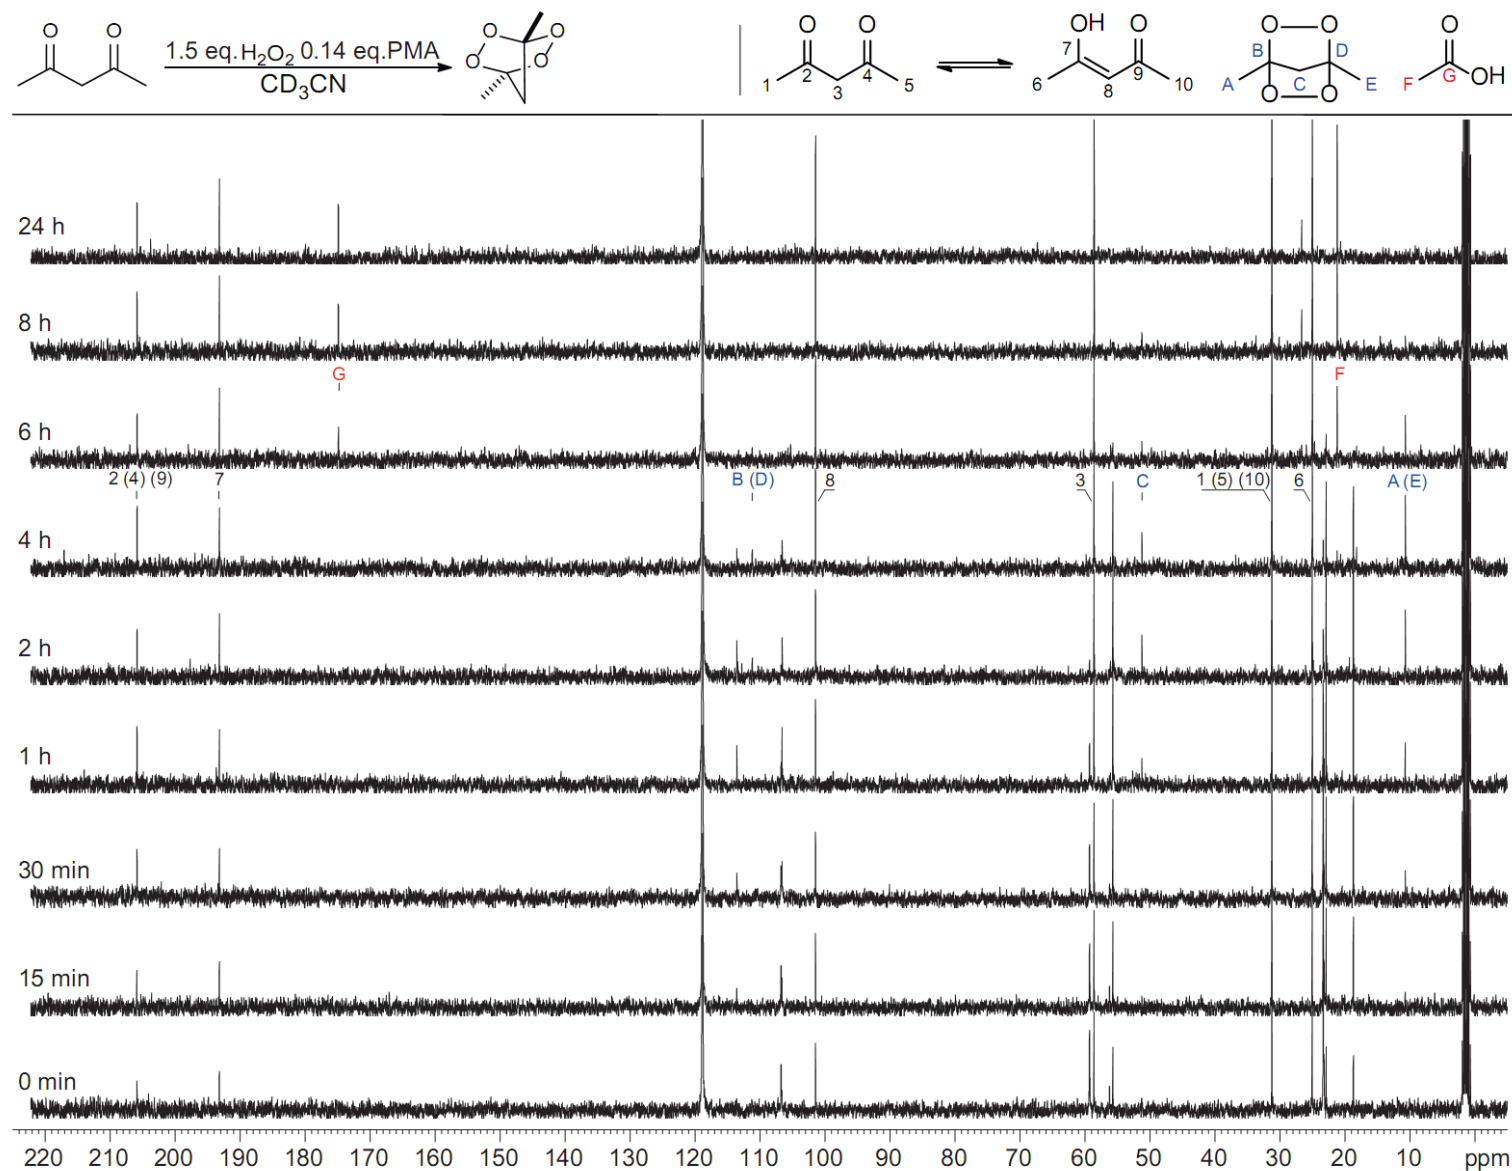

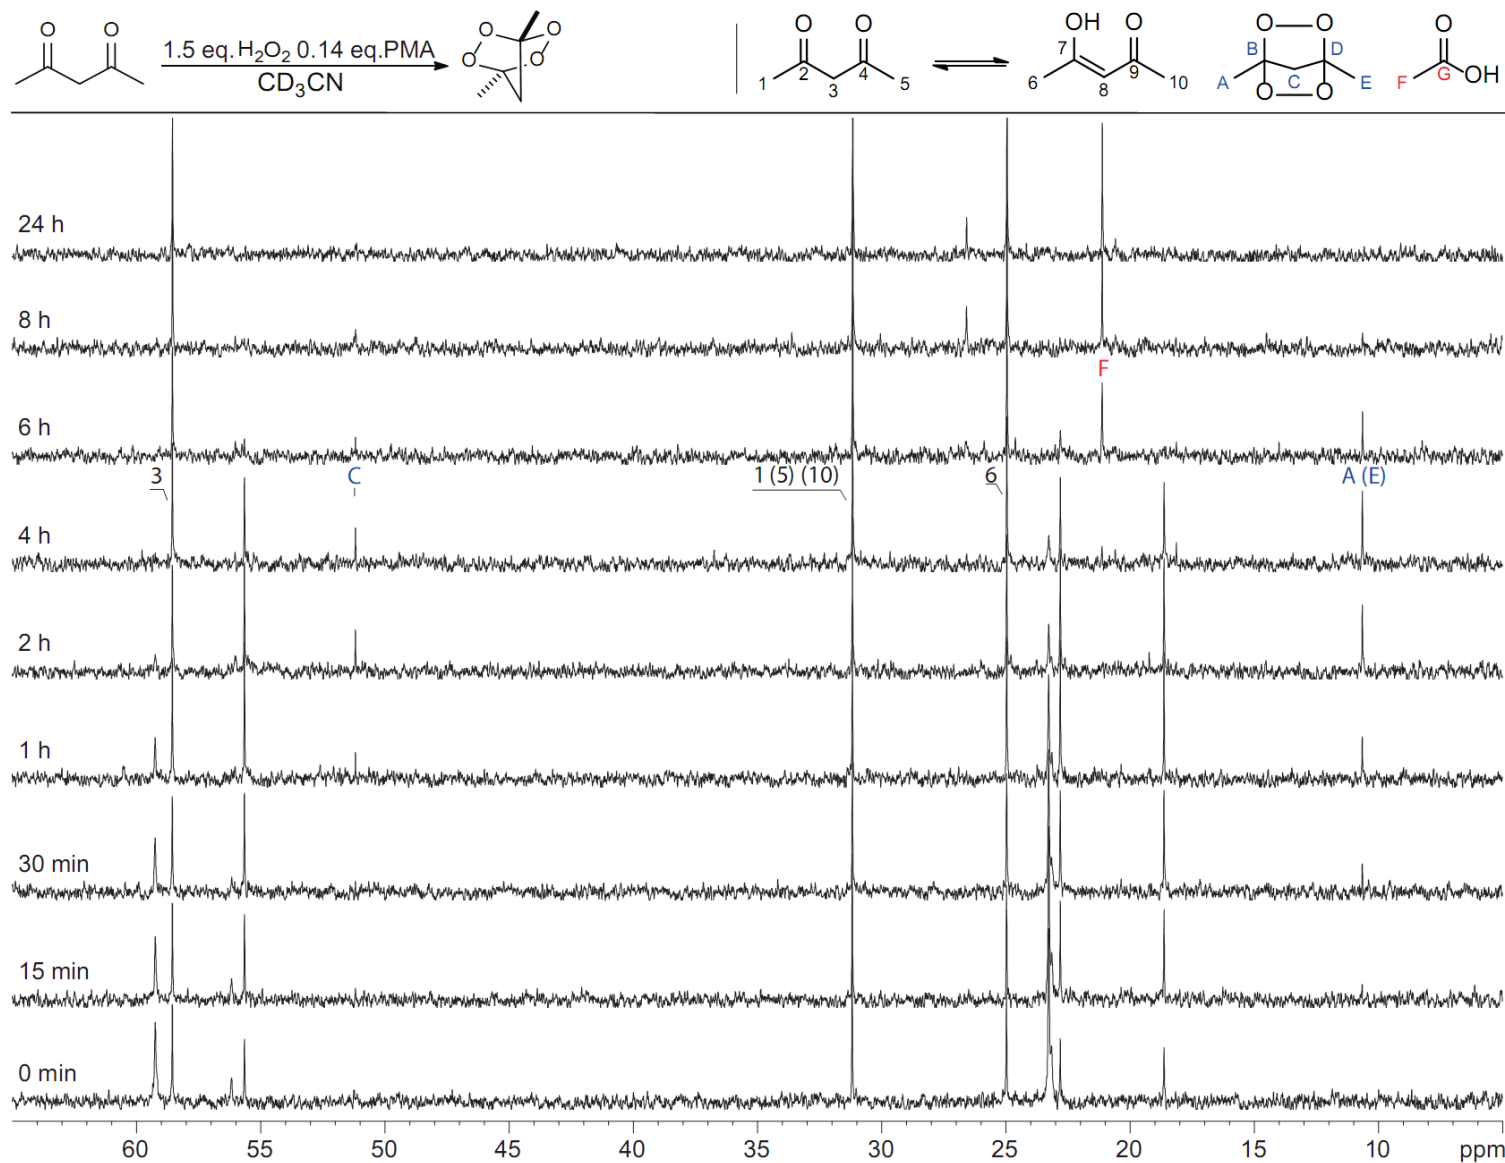

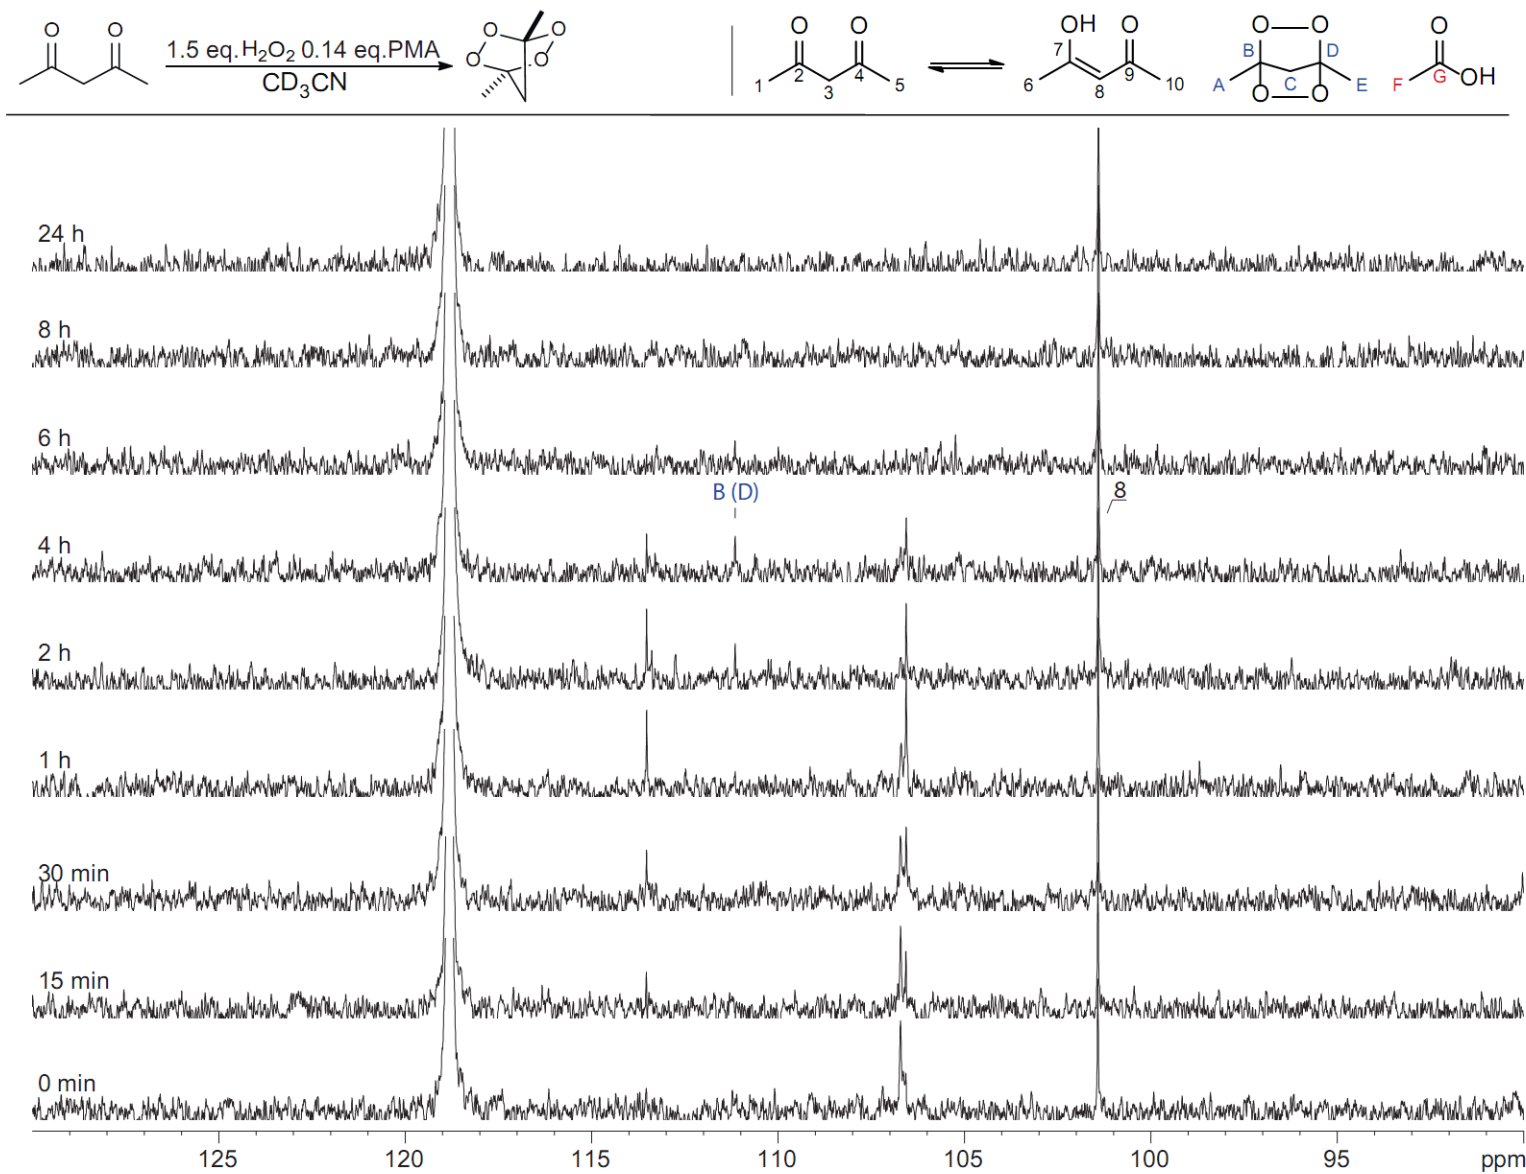

## Monitoring of the PMA-catalyzed reaction of 3-benzylpentane-2,4-dione **1k** with H<sub>2</sub>O<sub>2</sub>

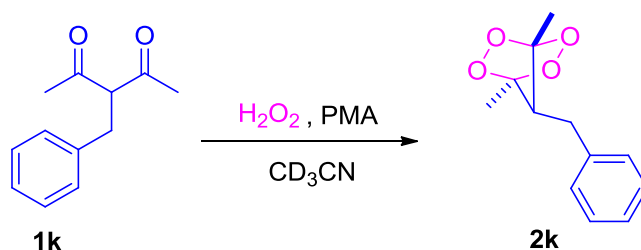

A 37% aqueous H<sub>2</sub>O<sub>2</sub> solution (55.1 mg, 0.60 mmol) and phosphomolybdic acid (PMA) (63.4 mg, 0.027 mmol) were successively added to a solution of diketone **1k** (38.2 mg, 0.20 mmol) in CD<sub>3</sub>CN (0.64 mL) at room temperature in an NMR tube. The course of the reaction was monitored in an NMR tube.

3-Benzylpentane-2,4-dione **1k**: <sup>13</sup>C NMR (75.48 MHz, CD<sub>3</sub>CN), δ: 23.6 (CH<sub>3</sub><sup>enol</sup>), 30.4(CH<sub>3</sub>), 33.3 (CH<sub>2</sub><sup>enol</sup>), 34.5 (CH<sub>2</sub>), 69.4 (CH), 109.6 (C<sup>enol</sup>), 127.1, 127.4, 128.5, 129.5, 129.6, 129.7 (CH<sub>ar</sub>), 139.8(C<sub>ar</sub>), 141.3 (C<sub>ar</sub><sup>enol</sup>), 193.2 (CO<sup>enol</sup>), 204.9 (CO).

(1,4)-7-Benzyl-1,4-dimethyl-2,3,5,6-tetraoxabicyclo[2.2.1]heptane **2k**: <sup>13</sup>C NMR (75.48 MHz, CD<sub>3</sub>CN), δ: 10.0 (CH<sub>3</sub>), 30.8 (CH<sub>2</sub>), 60.0 (CH), 111.7 (OCO), 118.24, 127.6, 129.6, 130.0 (CH<sub>ar</sub>), 138.9 (C<sub>ar</sub>).



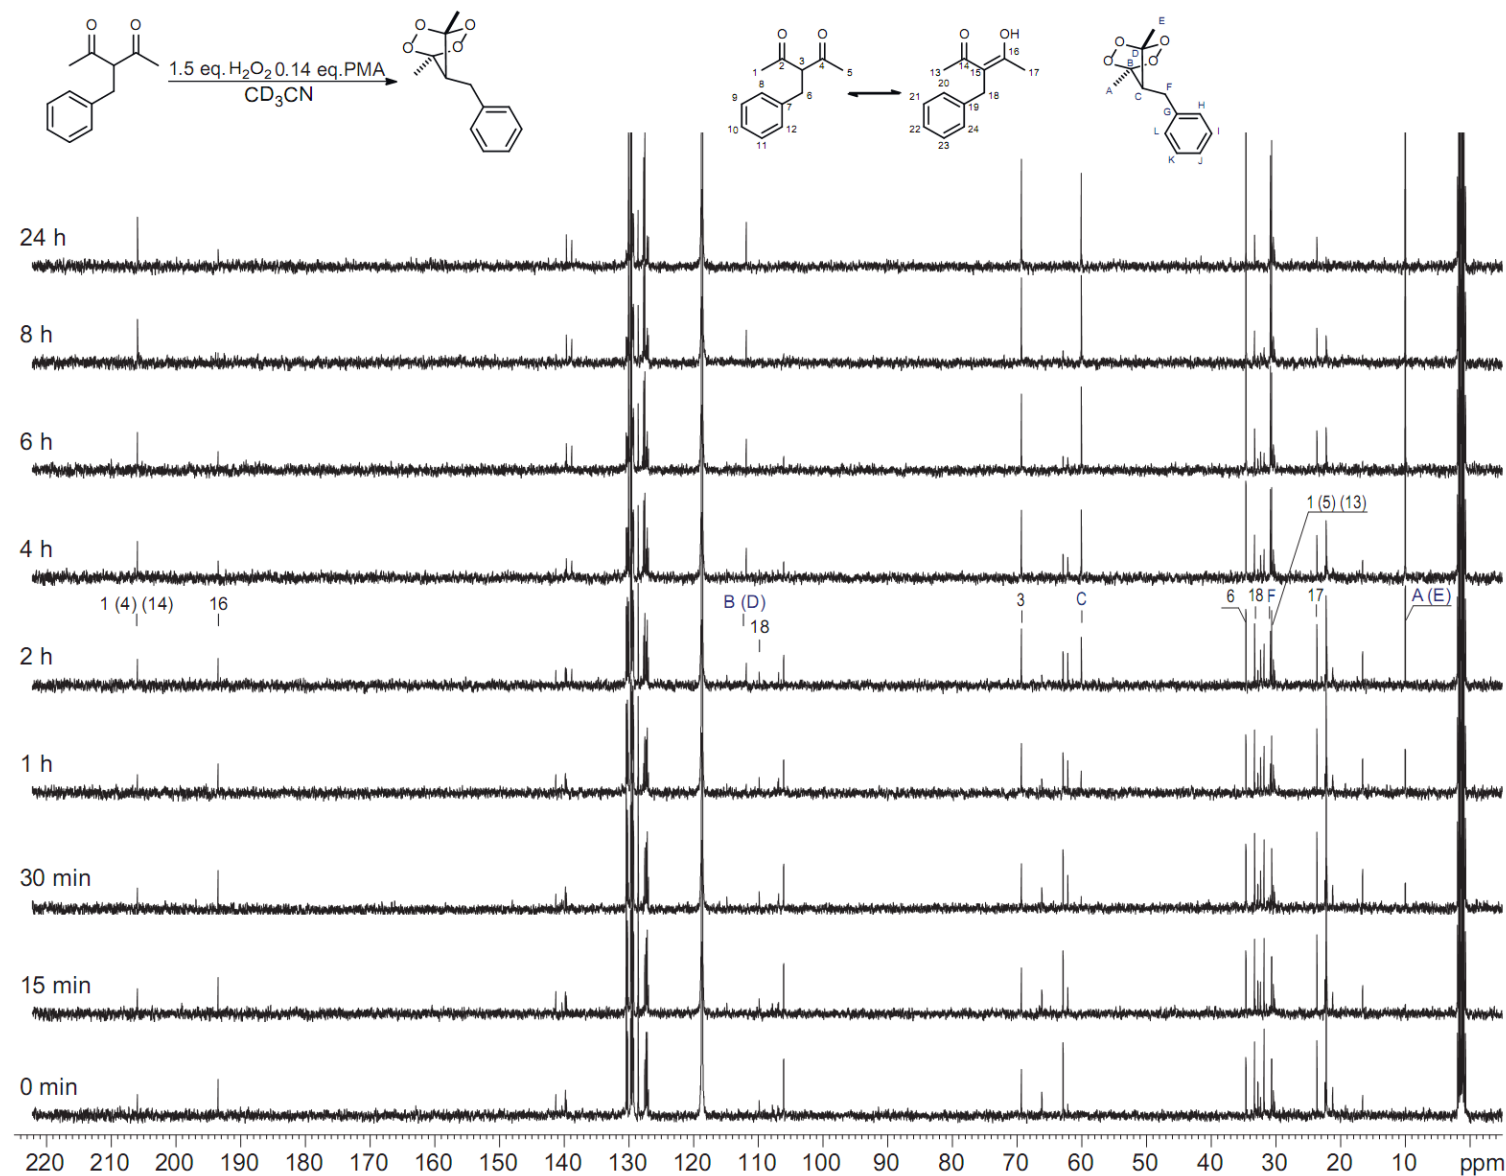

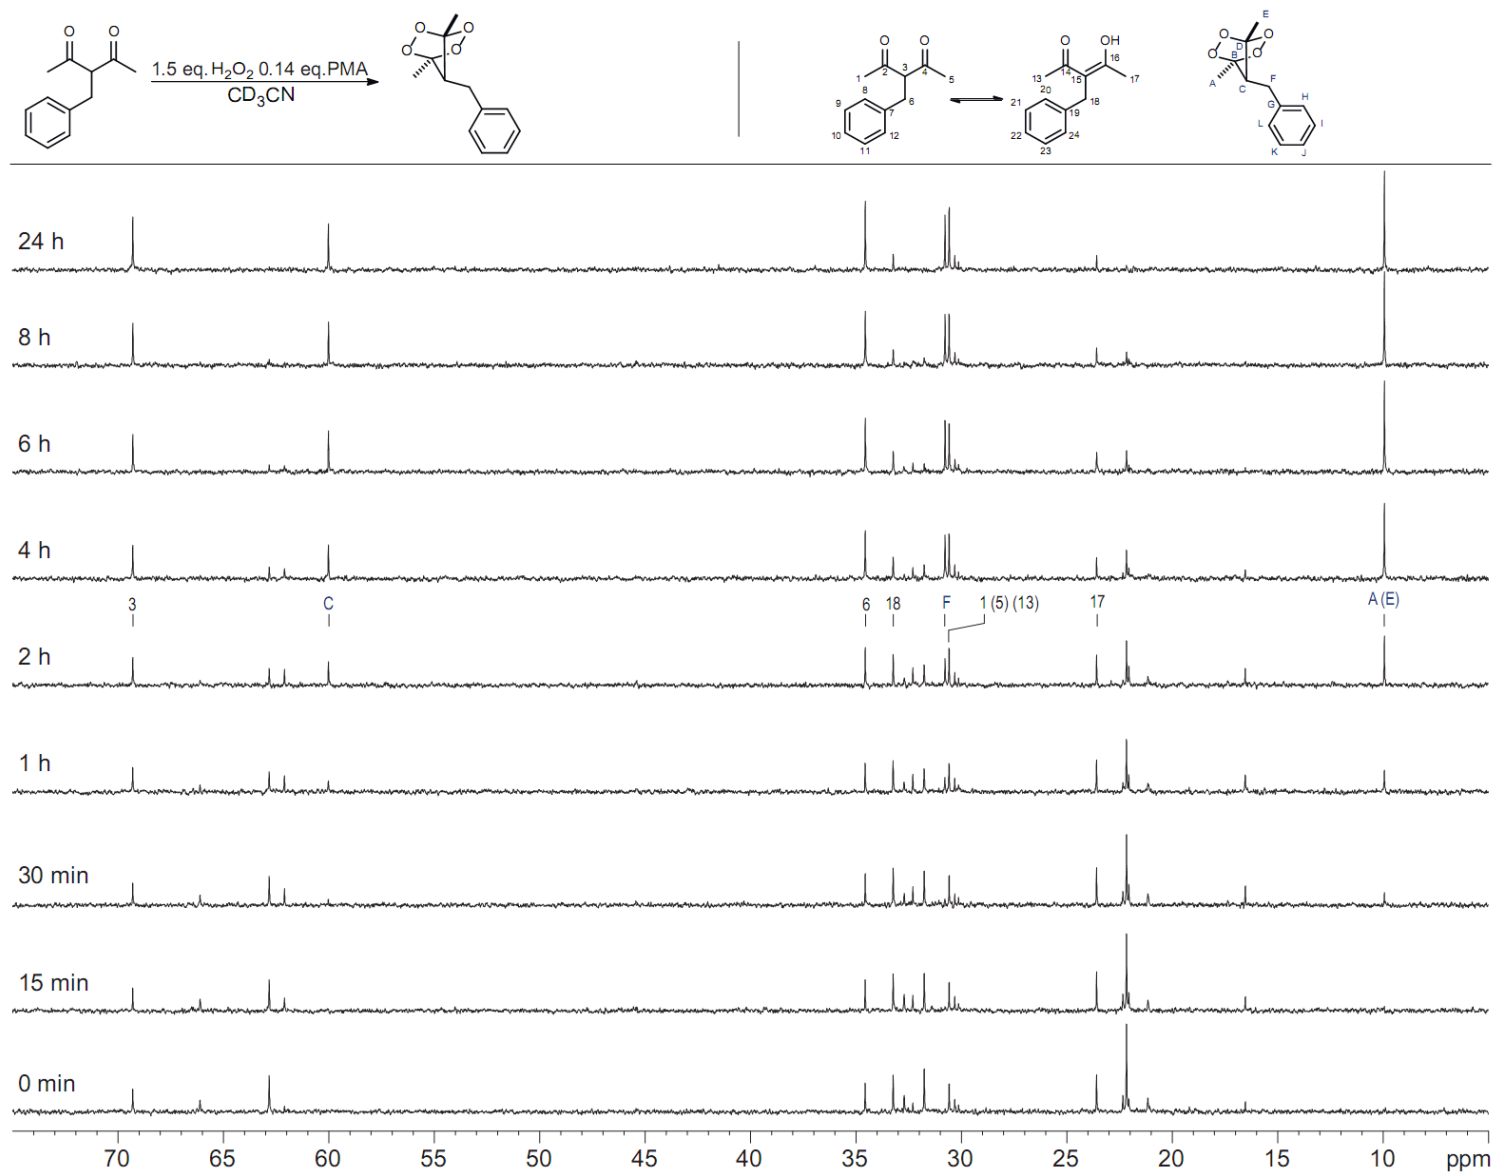

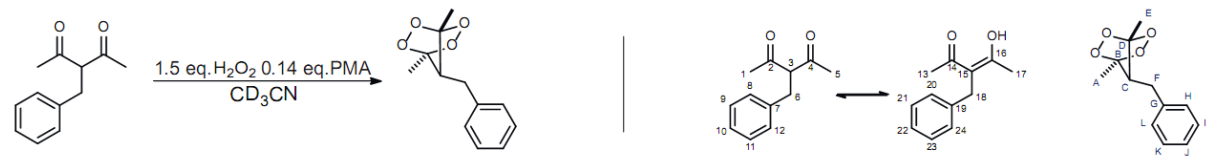

Supplement: c3ob27239g.pdf [file c3ob27239g.pdf]
